# Supplementary material
Source: PubMed Central journal article supplement (PMC3090727)
Supplement: NIHMS284910-supplement-Supp1.pdf [file NIHMS284910-supplement-Supp1.pdf]

## SUPPLEMENTAL MATERIAL

### Supplemental Figure 1. Validation of selected genes by quantitative real-time PCR.

Figure x shows correlation of relative gene expression measured by Affymetrix and RT-PCR for 4 candidate genes in 16 selected samples. Affymetrix values as expressed as units and RT-PCR values were calculated as  $\log_2$  of  $\Delta Ct_{\text{gene}}$  ( $\Delta Ct_{\text{gene}} = Ct_{\text{gene}} - Ct_{\text{HPRT}}$ ). **xA**: Tropomyosin 3 (TPM3), **xB**: Myosin light chain 4 (MYL4), **xC**: Nitric oxide synthase 1 (NOS1) and **xD**: Phosphorylase kinase beta (PHKB). **r**: Spearman rank correlation coefficient,  $P < 0.05$ .

**A**

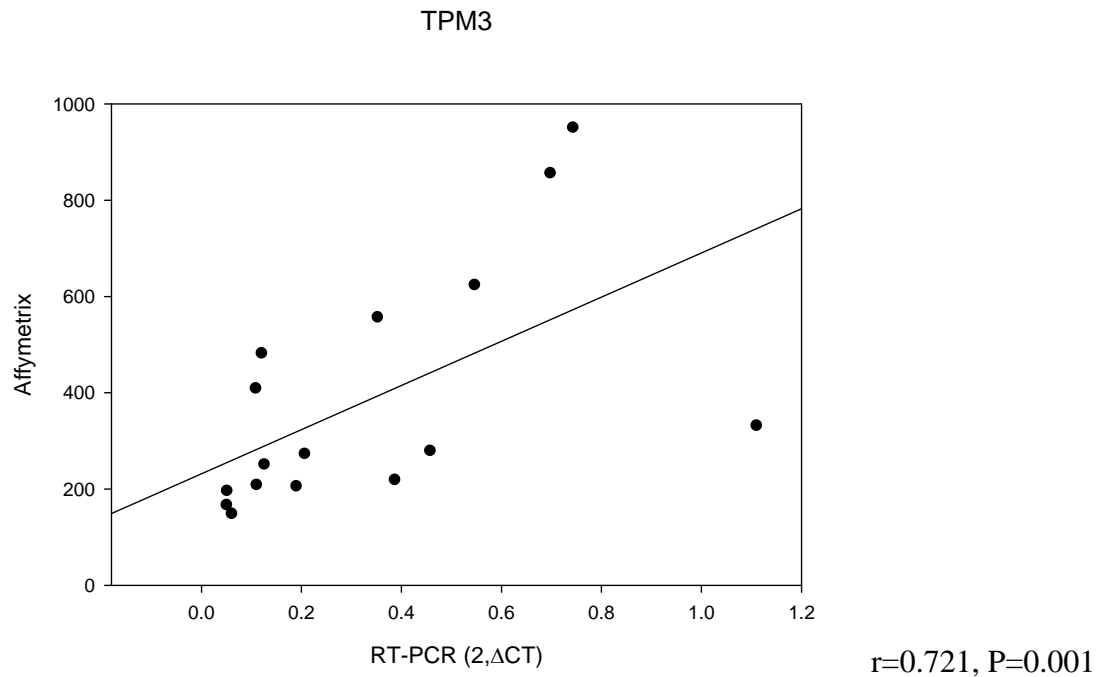

**B**

MYL4

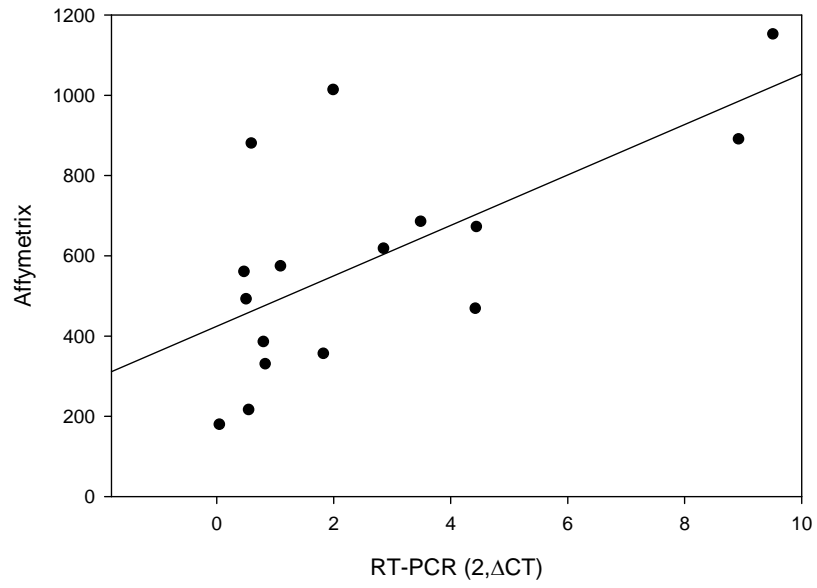

$r=0.635, P=0.008$

**C**

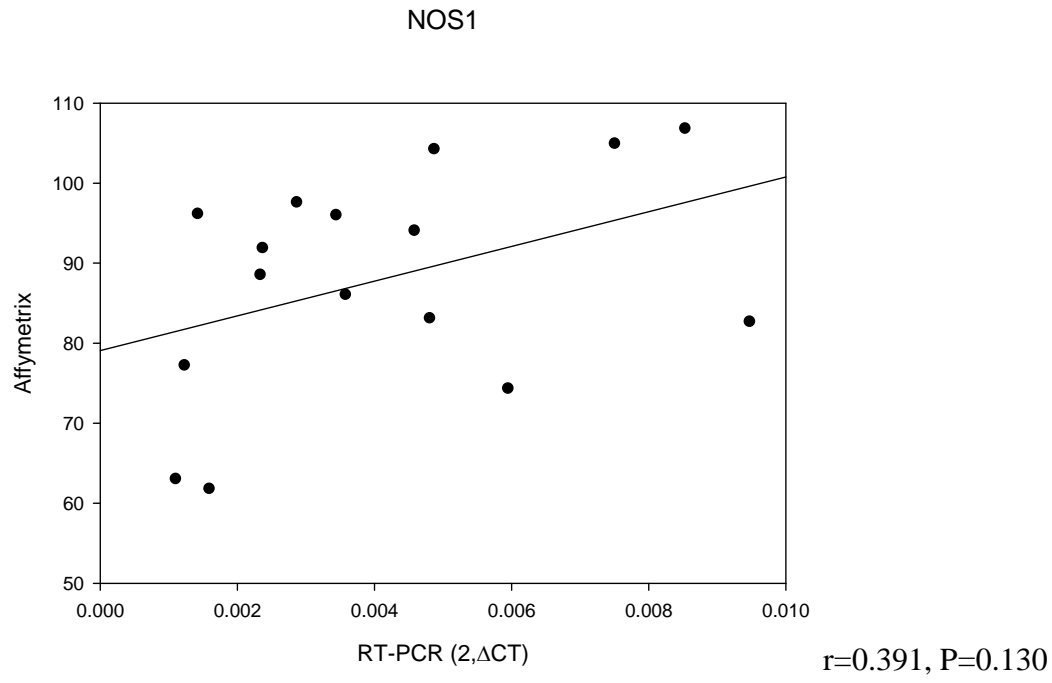

**D**

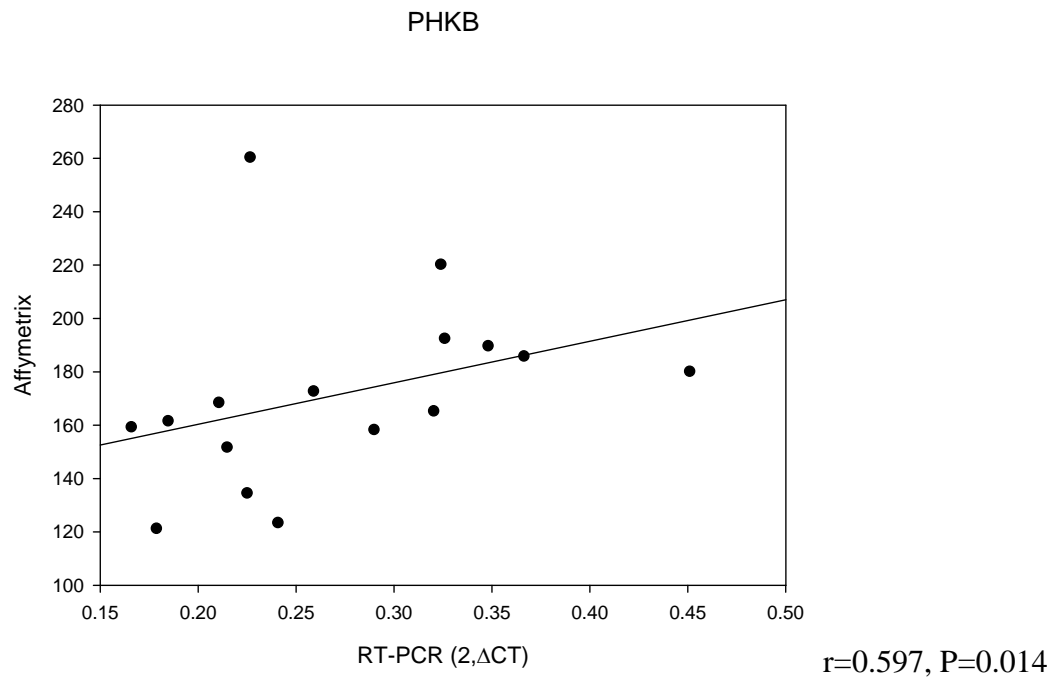

**Supplemental Table 1.** Differentially expressed genes for the all male versus female at the FDR adjusted *P* value significance level set at *P* < 0.05. Expression levels (Av Exp Female, Av Exp Male) are RMA normalized, fold changes (abs FC) are absolute fold changes and *P* values are FDR adjusted using the Benjamini and Hochberg method.

| Probe       | Symbol        | Description                                                            | Gene   | UniGene   | Av Exp Female | Av Exp Male | Fold Change | adj P val |
|-------------|---------------|------------------------------------------------------------------------|--------|-----------|---------------|-------------|-------------|-----------|
| 201909_at   | RPS4Y1        | ribosomal protein S4, Y-linked 1                                       | 6192   | Hs.282376 | 88.82         | 1065.95     | 144.04      | 1.36E-71  |
| 204409_s_at | EIF1AY        | eukaryotic translation initiation factor 1A, Y-linked                  | 9086   | Hs.461178 | 12.51         | 210.22      | 282.41      | 2.03E-63  |
| 221728_x_at | XIST          | X (inactive)-specific transcript                                       | 7503   | Hs.529901 | 275.35        | 37.23       | -54.71      | 6.05E-62  |
| 206700_s_at | JARID1D       | jumonji, AT rich interactive domain 1D                                 | 8284   | Hs.80358  | 68.10         | 175.69      | 6.66        | 6.21E-33  |
| 205000_at   | DDX3Y         | DEAD (Asp-Glu-Ala-Asp) box polypeptide 3, Y-linked                     | 8653   | Hs.99120  | 18.34         | 79.95       | 19.00       | 1.09E-32  |
| 207063_at   | CYorf14       | chromosome Y open reading frame 14                                     | 55410  | Hs.138453 | 47.30         | 87.48       | 3.42        | 7.56E-27  |
| 206624_at   | USP9Y         | ubiquitin specific peptidase 9, Y-linked (fat facets-like, Drosophila) | 8287   | Hs.655309 | 17.05         | 35.70       | 4.38        | 8.89E-17  |
| 201029_s_at | CD99          | CD99 molecule                                                          | 4267   | Hs.654354 | 1233.25       | 1656.04     | 1.80        | 6.87E-10  |
| 214131_at   | CYorf15B      | chromosome Y open reading frame 15B                                    | 84663  | Hs.592254 | 19.65         | 23.88       | 1.48        | 3.15E-06  |
| 207608_x_at | CYP1A2        | cytochrome P450, family 1, subfamily A, polypeptide 2                  | 1544   | Hs.1361   | 125.00        | 100.67      | -1.54       | 1.05E-05  |
| 216877_at   | DKFZp686O1327 | hypothetical gene supported by BC043549; BX648102                      | 401014 | Hs.42192  | 34.92         | 29.16       | -1.43       | 2.88E-05  |
| 219812_at   | PVRIG         | poliovirus receptor related immunoglobulin domain containing           | 79037  | Hs.521075 | 107.95        | 87.57       | -1.52       | 1.13E-04  |
| 200933_x_at | RPS4X         | ribosomal protein S4, X-linked                                         | 6191   | Hs.446628 | 3735.94       | 3258.38     | -1.31       | 1.38E-04  |
| 216342_x_at | LOC390183     | similar to 40S ribosomal protein S4, X isoform                         | 390183 | Hs.647251 | 1910.83       | 1589.74     | -1.44       | 2.20E-04  |
| 203461_at   | CHD2          | chromodomain helicase DNA binding protein 2                            | 1106   | Hs.220864 | 91.80         | 80.58       | -1.30       | 2.20E-04  |
| 208314_at   | RRH           | retinal pigment epithelium-derived rhodopsin homolog                   | 10692  | Hs.658310 | 49.96         | 42.15       | -1.40       | 2.61E-04  |
| 206281_at   | ADCYAP1       | adenylate cyclase activating polypeptide 1 (pituitary)                 | 116    | Hs.592343 | 47.98         | 41.60       | -1.33       | 3.54E-04  |

| Probe       | Symbol   | Description                                                       | Gene  | UniGene                                    | Av Exp Female | Av Exp Male | Fold Change | adj P val |
|-------------|----------|-------------------------------------------------------------------|-------|--------------------------------------------|---------------|-------------|-------------|-----------|
| 203043_at   | ZBED1    | zinc finger, BED-type containing 1                                | 9189  | Hs.131452                                  | 337.70        | 407.99      | 1.46        | 5.23E-04  |
| 221137_at   |          |                                                                   | 29016 |                                            | 20.83         | 18.19       | -1.31       | 5.68E-04  |
| 210648_x_at | SNX3     | sorting nexin 3                                                   | 8724  | Hs.12102                                   | 1498.26       | 1792.50     | 1.43        | 5.68E-04  |
| 213456_at   | SOSTDC1  | sclerostin domain containing 1                                    | 25928 | Hs.648106                                  | 28.40         | 24.53       | -1.34       | 6.06E-04  |
| 211224_s_at | ABCB11   | ATP-binding cassette, sub-family B (MDR/TAP), member 11           | 8647  | Hs.658439                                  | 33.36         | 29.86       | -1.25       | 6.30E-04  |
| 205879_x_at | RET      | ret proto-oncogene                                                | 5979  | Hs.350321                                  | 134.41        | 112.55      | -1.43       | 9.22E-04  |
| 220269_at   | FLJ23049 | hypothetical protein FLJ23049                                     | 79740 | Hs.478143                                  | 16.79         | 15.03       | -1.25       | 9.88E-04  |
| 203992_s_at | UTX      | ubiquitously transcribed tetratricopeptide repeat, X chromosome   | 7403  | Hs.522616                                  | 63.28         | 50.78       | -1.55       | 1.12E-03  |
| 207969_x_at | ACRV1    | acrosomal vesicle protein 1                                       | 56    | Hs.169222, Hs.596575                       | 68.46         | 57.07       | -1.44       | 1.12E-03  |
| 220295_x_at | DEPDC1   | DEP domain containing 1                                           | 55635 | Hs.445098                                  | 36.78         | 30.61       | -1.44       | 1.12E-03  |
| 216785_at   | FKBP1B   | FK506 binding protein 1B, 12.6 kDa                                | 2281  | Hs.407482                                  | 63.21         | 54.59       | -1.34       | 1.13E-03  |
| 220440_at   | LGALS13  | lectin, galactoside-binding, soluble, 13 (galectin 13)            | 29124 | Hs.23671                                   | 32.41         | 28.27       | -1.31       | 1.13E-03  |
| 222053_at   |          |                                                                   | 55310 |                                            | 52.67         | 45.50       | -1.34       | 1.13E-03  |
| 204393_s_at | ACPP     | acid phosphatase, prostate                                        | 55    | Hs.433060                                  | 20.48         | 18.28       | -1.26       | 1.13E-03  |
| 205671_s_at | HLA-DOB  | major histocompatibility complex, class II, DO beta               | 3112  | Hs.1802                                    | 42.78         | 35.20       | -1.48       | 1.14E-03  |
| 220040_x_at | KIAA1166 | KIAA1166                                                          | 55906 | Hs.28249                                   | 120.64        | 105.47      | -1.31       | 1.15E-03  |
| 211364_at   | MTAP     | methylthioadenosine phosphorylase                                 | 4507  | Hs.193268                                  | 85.14         | 72.77       | -1.37       | 1.16E-03  |
| 220355_s_at | PBRM1    | polybromo 1                                                       | 55193 | Hs.189920                                  | 141.53        | 172.71      | 1.49        | 1.24E-03  |
| 201022_s_at | DSTN     | destrin (actin depolymerizing factor)                             | 11034 | Hs.304192, Hs.667348                       | 1909.72       | 2259.38     | 1.40        | 1.24E-03  |
| 205710_at   | LRP2     | low density lipoprotein-related protein 2                         | 4036  | Hs.470538                                  | 47.78         | 42.57       | -1.26       | 1.24E-03  |
| 221258_s_at | KIF18A   | kinesin family member 18A                                         | 81930 | Hs.301052                                  | 13.07         | 12.12       | -1.16       | 1.25E-03  |
| 207874_s_at | CFHR4    | complement factor H-related 4                                     | 10877 | Hs.575869                                  | 28.39         | 24.70       | -1.32       | 1.30E-03  |
| 216437_at   | EPC1     | enhancer of polycomb homolog 1 (Drosophila)                       | 80314 | Hs.167805, Hs.633485, Hs.654404, Hs.654496 | 34.33         | 29.42       | -1.36       | 1.33E-03  |
| 217569_x_at | CAMK2D   | calcium/calmodulin-dependent protein kinase (CaM kinase) II delta | 817   | Hs.144114                                  | 51.13         | 40.84       | -1.57       | 1.33E-03  |

| Probe       | Symbol    | Description                                                                                    | Gene   | UniGene                               | Av Exp Female | Av Exp Male | Fold Change | adj P val |
|-------------|-----------|------------------------------------------------------------------------------------------------|--------|---------------------------------------|---------------|-------------|-------------|-----------|
| 222121_at   | SGEF      | Src homology 3 domain-containing guanine nucleotide exchange factor                            | 26084  | Hs.570682                             | 15.13         | 13.87       | -1.19       | 1.33E-03  |
| 220436_at   | CNTNAP3   | contactin associated protein-like 3                                                            | 79937  | Hs.521495,<br>Hs.604441,<br>Hs.658328 | 18.21         | 16.62       | -1.20       | 1.35E-03  |
| 221393_at   | TAAR3     | trace amine associated receptor 3                                                              | 9288   | Hs.679662                             | 35.76         | 30.74       | -1.35       | 1.46E-03  |
| 221685_s_at | CCDC99    | coiled-coil domain containing 99                                                               | 54908  | Hs.368710                             | 54.53         | 48.95       | -1.24       | 1.46E-03  |
| 209521_s_at | AMOT      | angiomotin                                                                                     | 154796 | Hs.528051                             | 50.89         | 45.14       | -1.27       | 1.46E-03  |
| 219610_at   | RGNEF     | Rho-guanine nucleotide exchange factor                                                         | 64283  | Hs.482521                             | 112.41        | 99.05       | -1.29       | 1.46E-03  |
| 220874_at   |           |                                                                                                | 55441  |                                       | 38.45         | 32.25       | -1.42       | 1.48E-03  |
| 215847_at   | LOC283755 | hypothetical protein LOC283755                                                                 | 283755 | Hs.655732                             | 27.53         | 23.55       | -1.37       | 1.48E-03  |
| 206581_at   | BNC1      | basonuclin 1                                                                                   | 646    | Hs.459153                             | 40.21         | 36.04       | -1.25       | 1.48E-03  |
| 220523_at   |           |                                                                                                | 79880  |                                       | 18.80         | 16.03       | -1.37       | 1.51E-03  |
| 220251_at   |           |                                                                                                | 80064  |                                       | 87.03         | 74.19       | -1.38       | 1.52E-03  |
| 220025_at   | TBR1      | T-box, brain, 1                                                                                | 10716  | Hs.210862                             | 27.03         | 23.83       | -1.29       | 1.52E-03  |
| 221431_s_at | OR12D3    | olfactory receptor, family 12, subfamily D, member 3                                           | 81797  | Hs.272280                             | 72.12         | 60.95       | -1.40       | 1.55E-03  |
| 203398_s_at | GALNT3    | UDP-N-acetyl-alpha-D-galactosamine:polypeptide N-acetylgalactosaminyltransferase 3 (GalNAc-T3) | 2591   | Hs.170986                             | 25.29         | 22.95       | -1.21       | 1.55E-03  |
| 220540_at   | KCNK15    | potassium channel, subfamily K, member 15                                                      | 60598  | Hs.528664                             | 16.19         | 14.80       | -1.20       | 1.58E-03  |
| 220944_at   | PGLYRP4   | peptidoglycan recognition protein 4                                                            | 57115  | Hs.58356                              | 154.30        | 131.19      | -1.38       | 1.58E-03  |
| 200976_s_at | TAX1BP1   | Tax1 (human T-cell leukemia virus type I) binding protein 1                                    | 8887   | Hs.34576                              | 598.16        | 770.81      | 1.66        | 1.58E-03  |
| 207298_at   | SLC17A3   | solute carrier family 17 (sodium phosphate), member 3                                          | 10786  | Hs.327179                             | 57.37         | 49.10       | -1.37       | 1.58E-03  |
| 214825_at   | LOC728215 | similar to transmembrane protein 28                                                            | 728215 | Hs.593580,<br>Hs.653511               | 47.64         | 40.63       | -1.37       | 1.58E-03  |
| 207902_at   | IL5RA     | interleukin 5 receptor, alpha                                                                  | 3568   | Hs.68876                              | 75.18         | 66.49       | -1.28       | 1.61E-03  |
| 220785_at   | UTS2      | urotensin 2                                                                                    | 10911  | Hs.162200                             | 21.46         | 18.82       | -1.30       | 1.66E-03  |
| 215856_at   | SIGLEC15  | sialic acid binding Ig-like lectin 15                                                          | 284266 | Hs.287692                             | 54.67         | 46.01       | -1.41       | 1.71E-03  |
| 211050_x_at | LOC643313 | similar to hypothetical protein LOC284701                                                      | 643313 | Hs.676949                             | 63.12         | 53.31       | -1.40       | 1.71E-03  |

| Probe       | Symbol    | Description                                                           | Gene   | UniGene                 | Av Exp<br>Female | Av Exp<br>Male | Fold<br>Change | adj P val |
|-------------|-----------|-----------------------------------------------------------------------|--------|-------------------------|------------------|----------------|----------------|-----------|
| 210409_at   | C6orf124  | chromosome 6 open reading frame 124                                   | 653483 | Hs.520556,<br>Hs.667982 | 41.41            | 35.46          | -1.36          | 1.81E-03  |
| 221467_at   | MC4R      | melanocortin 4 receptor                                               | 4160   | Hs.532833               | 44.73            | 39.79          | -1.26          | 1.81E-03  |
| 215182_x_at | LOC730096 | hypothetical protein LOC730096                                        | 730096 | Hs.572908               | 189.37           | 155.32         | -1.49          | 1.91E-03  |
| 221932_s_at | GLRX5     | glutaredoxin 5                                                        | 51218  | Hs.532683               | 960.13           | 1108.02        | 1.33           | 1.91E-03  |
| 204300_at   | PET112L   | PET112-like (yeast)                                                   | 5188   | Hs.119316               | 123.26           | 154.10         | 1.56           | 1.91E-03  |
| 220423_at   | PLA2G2D   | phospholipase A2, group IID                                           | 26279  | Hs.189507               | 212.20           | 177.79         | -1.42          | 1.92E-03  |
| 207596_at   |           |                                                                       | 55385  |                         | 13.38            | 12.30          | -1.18          | 1.93E-03  |
| 203974_at   | HDHD1A    | haloacid dehalogenase-like hydrolase domain containing 1A             | 8226   | Hs.185910               | 170.43           | 139.88         | -1.48          | 1.99E-03  |
| 219521_at   | B3GAT1    | beta-1,3-glucuronyltransferase 1 (glucuronosyltransferase P)          | 27087  | Hs.381050               | 82.90            | 71.25          | -1.35          | 1.99E-03  |
| 216622_at   | LAMB4     | laminin, beta 4                                                       | 22798  | Hs.62022                | 34.49            | 31.19          | -1.22          | 1.99E-03  |
| 220972_s_at | KRTAP9-9  | keratin associated protein 9-9                                        | 81870  | Hs.307010               | 14.09            | 12.74          | -1.22          | 1.99E-03  |
| 221144_at   |           |                                                                       | 55369  |                         | 18.78            | 16.75          | -1.26          | 1.99E-03  |
| 215019_x_at | ZNF528    | zinc finger protein 528                                               | 84436  | Hs.662043               | 37.16            | 33.03          | -1.27          | 1.99E-03  |
| 202554_s_at | GSTM3     | glutathione S-transferase M3 (brain)                                  | 2947   | Hs.2006                 | 486.34           | 662.11         | 1.85           | 1.99E-03  |
| 209567_at   | RRS1      | RRS1 ribosome biogenesis regulator homolog (S. cerevisiae)            | 23212  | Hs.71827                | 109.20           | 127.47         | 1.36           | 1.99E-03  |
| 206984_s_at | RIT2      | Ras-like without CAAX 2                                               | 6014   | Hs.464985               | 18.15            | 16.45          | -1.22          | 1.99E-03  |
| 221304_at   | UGT1A8    | UDP glucuronosyltransferase 1 family, polypeptide A8                  | 54576  | Hs.654499               | 22.33            | 19.70          | -1.29          | 2.29E-03  |
| 204637_at   | CGA       | glycoprotein hormones, alpha polypeptide                              | 1081   | Hs.119689               | 71.51            | 59.28          | -1.45          | 2.29E-03  |
| 216522_at   | OR2B6     | olfactory receptor, family 2, subfamily B, member 6                   | 26212  | Hs.532145               | 17.79            | 16.09          | -1.22          | 2.29E-03  |
| 207455_at   | P2RY1     | purinergic receptor P2Y, G-protein coupled, 1                         | 5028   | Hs.654526               | 18.42            | 16.76          | -1.21          | 2.32E-03  |
| 204082_at   | PBX3      | pre-B-cell leukemia homeobox 3                                        | 5090   | Hs.428027               | 265.76           | 332.93         | 1.57           | 2.49E-03  |
| 213828_x_at | H3F3A     | H3 histone, family 3A                                                 | 3020   | Hs.533624,<br>Hs.546259 | 2120.39          | 2454.04        | 1.34           | 2.55E-03  |
| 213544_at   | ING2      | inhibitor of growth family, member 2                                  | 3622   | Hs.107153               | 33.19            | 28.13          | -1.39          | 2.60E-03  |
| 208174_x_at | ZRSR2     | zinc finger (CCCH type), RNA-binding motif and serine/arginine rich 2 | 8233   | Hs.171909               | 156.18           | 135.71         | -1.32          | 2.60E-03  |
| 210750_s_at | DLGAP1    | discs, large                                                          | 9229   | Hs.654793               | 72.95            | 65.04          | -1.26          | 2.60E-03  |

| Probe       | Symbol    | Description                                                                                                  | Gene   | UniGene                 | Av Exp Female | Av Exp Male | Fold Change | adj P val |
|-------------|-----------|--------------------------------------------------------------------------------------------------------------|--------|-------------------------|---------------|-------------|-------------|-----------|
| 218364_at   | LRRFIP2   | (Drosophila) homolog-associated protein 1<br>leucine rich repeat (in FLII) interacting protein 2             | 9209   | Hs.475319               | 185.81        | 227.55      | 1.50        | 2.65E-03  |
| 215430_at   | GK2       | glycerol kinase 2                                                                                            | 2712   | Hs.98008                | 30.87         | 26.51       | -1.36       | 2.77E-03  |
| 202678_at   | GTF2A2    | general transcription factor IIA, 2, 12kDa                                                                   | 2958   | Hs.512934               | 419.86        | 520.58      | 1.54        | 2.77E-03  |
| 206513_at   | AIM2      | absent in melanoma 2                                                                                         | 9447   | Hs.281898               | 62.35         | 52.00       | -1.44       | 2.77E-03  |
| 219855_at   | NUDT11    | nudix (nucleoside diphosphate linked moiety X)-type motif 11                                                 | 55190  | Hs.200016               | 131.81        | 117.54      | -1.26       | 2.77E-03  |
| 218123_at   | C21orf59  | chromosome 21 open reading frame 59                                                                          | 56683  | Hs.5811                 | 105.61        | 126.80      | 1.44        | 2.77E-03  |
| 201423_s_at | CUL4A     | cullin 4A                                                                                                    | 8451   | Hs.339735               | 264.97        | 325.10      | 1.51        | 2.95E-03  |
| 217551_at   | LOC441453 | similar to olfactory receptor, family 7, subfamily A, member 17                                              | 441453 | Hs.523504               | 22.81         | 19.98       | -1.30       | 2.95E-03  |
| 202738_s_at | PHKB      | phosphorylase kinase, beta                                                                                   | 5257   | Hs.78060                | 143.91        | 181.02      | 1.58        | 2.95E-03  |
| 201520_s_at | GRSF1     | G-rich RNA sequence binding factor 1                                                                         | 2926   | Hs.309763,<br>Hs.634071 | 368.65        | 460.56      | 1.56        | 2.95E-03  |
| 220853_at   |           |                                                                                                              | 29036  |                         | 70.39         | 59.35       | -1.41       | 2.95E-03  |
| 207951_at   | CSN2      | casein beta                                                                                                  | 1447   | Hs.2242                 | 39.93         | 34.95       | -1.31       | 2.95E-03  |
| 218773_s_at | MSRB2     | methionine sulfoxide reductase B2                                                                            | 22921  | Hs.461420               | 1190.14       | 1403.61     | 1.39        | 2.95E-03  |
| 218373_at   | AKTIP     | AKT interacting protein                                                                                      | 64400  | Hs.380897               | 199.24        | 238.90      | 1.44        | 2.98E-03  |
| 213909_at   | LRRC15    | leucine rich repeat containing 15                                                                            | 131578 | Hs.288467               | 88.87         | 75.66       | -1.38       | 2.98E-03  |
| 220717_at   | ADAMTS20  | ADAM metalloproteinase with thrombospondin type 1 motif, 20                                                  | 80070  | Hs.287554               | 13.14         | 12.12       | -1.17       | 3.03E-03  |
| 220049_s_at | PDCD1LG2  | programmed cell death 1 ligand 2                                                                             | 80380  | Hs.532279               | 31.59         | 28.54       | -1.23       | 3.06E-03  |
| 207537_at   | PFKFB1    | 6-phosphofructo-2-kinase/fructose-2,6-biphosphatase 1                                                        | 5207   | Hs.444304               | 134.78        | 113.51      | -1.41       | 3.12E-03  |
| 207426_s_at | TNFSF4    | tumor necrosis factor (ligand) superfamily, member 4 (tax-transcriptionally activated glycoprotein 1, 34kDa) | 7292   | Hs.181097               | 56.94         | 50.99       | -1.25       | 3.12E-03  |
| 207441_at   | SMR3B     | submaxillary gland androgen regulated protein 3 homolog B (mouse)                                            | 10879  | Hs.650650               | 33.98         | 29.66       | -1.31       | 3.12E-03  |
| 217215_s_at |           |                                                                                                              | 11134  |                         | 35.24         | 30.29       | -1.35       | 3.12E-03  |
| 205456_at   | CD3E      | CD3e molecule, epsilon                                                                                       | 916    | Hs.3003                 | 169.33        | 142.39      | -1.41       | 3.12E-03  |



| Probe       | Symbol   | Description                                                         | Gene  | UniGene              | Av Exp Female | Av Exp Male | Fold Change | adj P val |
|-------------|----------|---------------------------------------------------------------------|-------|----------------------|---------------|-------------|-------------|-----------|
|             |          | (CD3-TCR complex)                                                   |       |                      |               |             |             |           |
| 220624_s_at | ELF5     | E74-like factor 5 (ets domain transcription factor)                 | 2001  | Hs.11713             | 36.94         | 32.69       | -1.28       | 3.16E-03  |
| 218118_s_at | TIMM23   | translocase of inner mitochondrial membrane 23 homolog (yeast)      | 10431 | Hs.524308, Hs.661964 | 128.84        | 150.47      | 1.36        | 3.16E-03  |
| 205725_at   | SCGB1A1  | secretoglobin, family 1A, member 1 (uteroglobin)                    | 7356  | Hs.523732            | 36.61         | 32.45       | -1.27       | 3.17E-03  |
| 204624_at   | ATP7B    | ATPase, Cu++ transporting, beta polypeptide                         | 540   | Hs.492280            | 58.39         | 52.19       | -1.25       | 3.17E-03  |
| 208165_s_at | PRSS16   | protease, serine, 16 (thymus)                                       | 10279 | Hs.274407            | 27.87         | 24.34       | -1.31       | 3.19E-03  |
| 201632_at   | EIF2B1   | eukaryotic translation initiation factor 2B, subunit 1 alpha, 26kDa | 1967  | Hs.78592             | 177.74        | 205.37      | 1.34        | 3.20E-03  |
| 220232_at   | SCD5     | stearoyl-CoA desaturase 5                                           | 79966 | Hs.379191            | 180.34        | 126.10      | -2.05       | 3.21E-03  |
| 207505_at   | PRKG2    | protein kinase, cGMP-dependent, type II                             | 5593  | Hs.570833            | 102.30        | 90.57       | -1.28       | 3.37E-03  |
| 215334_at   | KIAA0953 | KIAA0953                                                            | 22979 | Hs.654648            | 98.12         | 86.50       | -1.29       | 3.37E-03  |
| 210394_x_at | SSX4     | synovial sarcoma, X breakpoint 4                                    | 6759  | Hs.558402            | 32.46         | 28.44       | -1.30       | 3.37E-03  |
| 208237_x_at | ADAM22   | ADAM metallopeptidase domain 22                                     | 53616 | Hs.592282            | 128.78        | 114.45      | -1.27       | 3.37E-03  |
| 220653_at   | ZIM2     | zinc finger, imprinted 2                                            | 23619 | Hs.201776            | 108.54        | 94.42       | -1.32       | 3.37E-03  |
| 210325_at   | CD1A     | CD1a molecule                                                       | 909   | Hs.1309              | 116.37        | 97.70       | -1.42       | 3.37E-03  |
| 221173_at   |          |                                                                     | 80102 |                      | 42.03         | 35.32       | -1.42       | 3.37E-03  |
| 210356_x_at | MS4A1    | membrane-spanning 4-domains, subfamily A, member 1                  | 931   | Hs.438040            | 40.88         | 32.28       | -1.60       | 3.45E-03  |
| 205636_at   | SH3GL3   | SH3-domain GRB2-like 3                                              | 6457  | Hs.270055, Hs.666365 | 126.28        | 111.57      | -1.28       | 3.45E-03  |
| 211238_at   | ADAM7    | ADAM metallopeptidase domain 7                                      | 8756  | Hs.668805            | 29.53         | 26.47       | -1.24       | 3.45E-03  |
| 203259_s_at | HDDC2    | HD domain containing 2                                              | 51020 | Hs.32826             | 302.16        | 383.73      | 1.61        | 3.50E-03  |
| 207938_at   | PI15     | peptidase inhibitor 15                                              | 51050 | Hs.98558             | 29.15         | 25.70       | -1.29       | 3.50E-03  |
| 220814_at   | SLC30A6  | solute carrier family 30 (zinc transporter), member 6               | 55676 | Hs.23248             | 25.36         | 22.83       | -1.23       | 3.50E-03  |
| 206828_at   | TXK      | TXK tyrosine kinase                                                 | 7294  | Hs.479669            | 17.42         | 15.78       | -1.22       | 3.50E-03  |
| 219511_s_at | SNCAIP   | synuclein, alpha interacting protein (synphilin)                    | 9627  | Hs.426463            | 55.54         | 49.63       | -1.25       | 3.50E-03  |
| 202732_at   | PKIG     | protein kinase (cAMP-dependent, catalytic) inhibitor gamma          | 11142 | Hs.651213            | 614.12        | 751.40      | 1.50        | 3.50E-03  |

| Probe       | Symbol    | Description                                                          | Gene  | UniGene              | Av Exp Female | Av Exp Male | Fold Change | adj P val |
|-------------|-----------|----------------------------------------------------------------------|-------|----------------------|---------------|-------------|-------------|-----------|
| 217882_at   | TMEM111   | transmembrane protein 111                                            | 55831 | Hs.475392            | 360.98        | 432.45      | 1.44        | 3.50E-03  |
| 200761_s_at | ARL6IP5   | ADP-ribosylation-like factor 6 interacting protein 5                 | 10550 | Hs.518060, Hs.694039 | 669.09        | 800.33      | 1.43        | 3.68E-03  |
| 220428_at   | CD207     | CD207 molecule, langerin                                             | 50489 | Hs.199731            | 38.11         | 33.57       | -1.29       | 3.71E-03  |
| 206525_at   | GABRR1    | gamma-aminobutyric acid (GABA) receptor, rho 1                       | 2569  | Hs.437745            | 20.93         | 18.65       | -1.26       | 3.71E-03  |
| 210595_at   | ZNF235    | zinc finger protein 235                                              | 9310  | Hs.298089, Hs.664229 | 42.97         | 38.37       | -1.25       | 3.71E-03  |
| 216535_at   | CADM3     | cell adhesion molecule 3                                             | 57863 | Hs.365689            | 165.73        | 139.27      | -1.42       | 3.77E-03  |
| 205358_at   | GRIA2     | glutamate receptor, ionotropic, AMPA 2                               | 2891  | Hs.32763             | 17.41         | 15.74       | -1.22       | 3.77E-03  |
| 222167_at   | PVRL3     | poliovirus receptor-related 3                                        | 25945 | Hs.293917            | 44.00         | 37.99       | -1.34       | 3.77E-03  |
| 221134_at   | ANGPT4    | angiopoietin 4                                                       | 51378 | Hs.278973            | 59.61         | 52.85       | -1.27       | 3.86E-03  |
| 206310_at   | SPINK2    | serine peptidase inhibitor, Kazal type 2 (acrosin-trypsin inhibitor) | 6691  | Hs.98243             | 59.07         | 50.88       | -1.35       | 3.86E-03  |
| 203264_s_at | ARHGEF9   | Cdc42 guanine nucleotide exchange factor (GEF) 9                     | 23229 | Hs.54697             | 146.00        | 179.99      | 1.52        | 3.88E-03  |
| 220873_at   |           |                                                                      | 55428 |                      | 58.49         | 48.88       | -1.43       | 3.88E-03  |
| 220283_at   | KIAA1822L | KIAA1822-like                                                        | 79802 | Hs.665660            | 53.32         | 46.47       | -1.32       | 3.95E-03  |
| 221859_at   | SYT13     | synaptotagmin XIII                                                   | 57586 | Hs.436643            | 76.96         | 65.83       | -1.37       | 4.04E-03  |
| 215970_at   | ZP4       | zona pellucida glycoprotein 4                                        | 57829 | Hs.136241            | 22.02         | 19.54       | -1.27       | 4.04E-03  |
| 206438_x_at | TCTN2     | tectonic family member 2                                             | 79867 | Hs.167165            | 255.20        | 216.84      | -1.39       | 4.23E-03  |
| 220459_at   |           |                                                                      | 55155 |                      | 17.22         | 15.49       | -1.24       | 4.26E-03  |
| 202432_at   | PPP3CB    | protein phosphatase 3 (formerly 2B), catalytic subunit, beta isoform | 5532  | Hs.500067            | 349.41        | 422.82      | 1.46        | 4.26E-03  |
| 209771_x_at | CD24      | CD24 molecule                                                        | 934   | Hs.644105, Hs.694721 | 32.40         | 41.01       | 1.60        | 4.33E-03  |
| 219551_at   | EAF2      | ELL associated factor 2                                              | 55840 | Hs.477325            | 32.29         | 28.93       | -1.25       | 4.40E-03  |
| 207261_at   | CNGA3     | cyclic nucleotide gated channel alpha 3                              | 1261  | Hs.234785            | 20.03         | 17.67       | -1.29       | 4.47E-03  |
| 216341_s_at | GNRHR     | gonadotropin-releasing hormone receptor                              | 2798  | Hs.407587            | 51.42         | 43.82       | -1.38       | 4.52E-03  |
| 206732_at   | SLITRK3   | SLIT and NTRK-like family, member 3                                  | 22865 | Hs.101745            | 23.24         | 20.85       | -1.24       | 4.54E-03  |
| 208376_at   | CCR4      | chemokine (C-C motif) receptor 4                                     | 1233  | Hs.184926            | 74.93         | 64.24       | -1.36       | 4.84E-03  |
| 207801_s_at | RNF10     | ring finger protein 10                                               | 9921  | Hs.442798            | 417.67        | 488.08      | 1.37        | 4.87E-03  |
| 205480_s_at | UGP2      | UDP-glucose                                                          | 7360  | Hs.516217            | 1159.67       | 1416.26     | 1.49        | 4.89E-03  |

| Probe       | Symbol   | Description                                                            | Gene      | UniGene              | Av Exp Female | Av Exp Male | Fold Change | adj P val |
|-------------|----------|------------------------------------------------------------------------|-----------|----------------------|---------------|-------------|-------------|-----------|
|             |          | pyrophosphorylase 2                                                    |           |                      |               |             |             |           |
| 207068_at   | ZFP37    | zinc finger protein 37 homolog (mouse)                                 | 7539      | Hs.150406            | 29.03         | 26.58       | -1.19       | 4.91E-03  |
| 219859_at   | CLEC4E   | C-type lectin domain family 4, member E                                | 26253     | Hs.236516            | 35.12         | 30.67       | -1.31       | 4.91E-03  |
| 211126_s_at | CSRP2    | cysteine and glycine-rich protein 2                                    | 1466      | Hs.530904            | 96.49         | 121.39      | 1.58        | 5.00E-03  |
| 204405_x_at | DIMT1L   | DIM1 dimethyladenosine transferase 1-like (S. cerevisiae)              | 27292     | Hs.533222            | 171.66        | 211.57      | 1.52        | 5.08E-03  |
| 65517_at    | AP1M2    | adaptor-related protein complex 1, mu 2 subunit                        | 10053     | Hs.18894             | 156.80        | 137.91      | -1.29       | 5.08E-03  |
| 208172_s_at | KCNB2    | potassium voltage-gated channel, Shab-related subfamily, member 2      | 9312      | Hs.661102            | 79.33         | 68.83       | -1.33       | 5.08E-03  |
| 203949_at   | MPO      | myeloperoxidase                                                        | 4353      | Hs.458272            | 38.19         | 33.70       | -1.28       | 5.08E-03  |
| 206704_at   | CLCN5    | chloride channel 5 (nephrolithiasis 2, X-linked, Dent disease)         | 1184      | Hs.166486            | 21.98         | 19.85       | -1.23       | 5.10E-03  |
| 211497_x_at | NKX3-1   | NK3 homeobox 1                                                         | 4824      | Hs.55999             | 119.04        | 103.62      | -1.32       | 5.15E-03  |
| 215057_at   | FLJ44451 | hypothetical protein FLJ44451                                          | 100101122 | Hs.496916, Hs.690082 | 55.03         | 48.46       | -1.29       | 5.16E-03  |
| 221546_at   | PRPF18   | PRP18 pre-mRNA processing factor 18 homolog (S. cerevisiae)            | 8559      | Hs.161181            | 111.95        | 97.50       | -1.32       | 5.32E-03  |
| 220857_at   |          |                                                                        | 29050     |                      | 30.51         | 27.36       | -1.24       | 5.32E-03  |
| 206319_s_at | SPINLW1  | serine peptidase inhibitor-like, with Kunitz and WAP domains 1 (eppin) | 57119     | Hs.121084            | 31.59         | 26.80       | -1.39       | 5.32E-03  |
| 213363_at   | CA5BL    | carbonic anhydrase VB-like                                             | 340591    | Hs.532326            | 119.65        | 106.65      | -1.26       | 5.33E-03  |
| 205226_at   | PDGFRL   | platelet-derived growth factor receptor-like                           | 5157      | Hs.458573            | 47.10         | 60.86       | 1.67        | 5.33E-03  |
| 217708_x_at | BRAP     | BRCA1 associated protein                                               | 8315      | Hs.577448            | 132.84        | 109.19      | -1.48       | 5.36E-03  |
| 206261_at   | ZNF239   | zinc finger protein 239                                                | 8187      | Hs.25040             | 49.33         | 42.49       | -1.35       | 5.42E-03  |
| 210523_at   | BMPR1B   | bone morphogenetic protein receptor, type IB                           | 658       | Hs.661426            | 65.99         | 53.56       | -1.52       | 5.44E-03  |
| 219652_s_at | CXorf36  | chromosome X open reading frame 36                                     | 79742     | Hs.98321, Hs.648299  | 131.02        | 116.19      | -1.27       | 5.64E-03  |
| 203261_at   | DCTN6    | dynactin 6                                                             | 10671     | Hs.158427            | 435.14        | 529.57      | 1.48        | 5.69E-03  |
| 205758_at   | CD8A     | CD8a molecule                                                          | 925       | Hs.85258             | 129.14        | 109.87      | -1.38       | 5.70E-03  |
| 205977_s_at | EPHA1    | EPH receptor A1                                                        | 2041      | Hs.89839             | 52.96         | 47.34       | -1.25       | 5.72E-03  |
| 209827_s_at | IL16     | interleukin 16 (lymphocyte                                             | 3603      | Hs.459095            | 96.91         | 81.59       | -1.41       | 5.72E-03  |

| Probe       | Symbol   | Description                                                                                 | Gene  | UniGene                               | Av Exp Female | Av Exp Male | Fold Change | adj P val |
|-------------|----------|---------------------------------------------------------------------------------------------|-------|---------------------------------------|---------------|-------------|-------------|-----------|
| 200759_x_at | NFE2L1   | chemoattractant factor)<br>nuclear factor (erythroid-derived 2)-like 1                      | 4779  | Hs.514284                             | 1289.27       | 1507.33     | 1.37        | 5.72E-03  |
| 210843_s_at | MFAP3L   | microfibrillar-associated protein 3-like                                                    | 9848  | Hs.178121,<br>Hs.593942               | 32.96         | 29.47       | -1.25       | 5.72E-03  |
| 202761_s_at | SYNE2    | spectrin repeat containing, nuclear envelope 2                                              | 23224 | Hs.525392                             | 177.81        | 281.00      | 2.50        | 5.72E-03  |
| 217287_s_at | TRPC6    | transient receptor potential cation channel, subfamily C, member 6                          | 7225  | Hs.159003                             | 29.21         | 26.51       | -1.21       | 5.72E-03  |
| 207245_at   | UGT2B17  | UDP glucuronosyltransferase 2 family, polypeptide B17                                       | 7367  | Hs.575083                             | 16.10         | 14.25       | -1.28       | 5.72E-03  |
| 207051_at   | SLC17A4  | solute carrier family 17 (sodium phosphate), member 4                                       | 10050 | Hs.282931                             | 91.00         | 79.16       | -1.32       | 5.72E-03  |
| 205103_at   | C1orf61  | chromosome 1 open reading frame 61                                                          | 10485 | Hs.380027                             | 151.75        | 133.59      | -1.29       | 5.72E-03  |
| 220951_s_at | ACF      | apobec-1 complementation factor                                                             | 29974 | Hs.499643                             | 79.16         | 66.29       | -1.43       | 5.74E-03  |
| 204967_at   | SHROOM2  | shroom family member 2                                                                      | 357   | Hs.567236                             | 63.98         | 56.59       | -1.28       | 5.74E-03  |
| 220970_s_at | KRTAP2-4 | keratin associated protein 2-4                                                              | 85294 | Hs.406714,<br>Hs.560502               | 31.59         | 28.65       | -1.22       | 5.84E-03  |
| 201935_s_at | EIF4G3   | eukaryotic translation initiation factor 4 gamma, 3                                         | 8672  | Hs.467084                             | 90.62         | 113.39      | 1.57        | 5.84E-03  |
| 220568_at   | PRO1483  | hypothetical protein PRO1483                                                                | 55448 |                                       | 34.60         | 31.74       | -1.19       | 5.90E-03  |
| 218619_s_at | SUV39H1  | suppressor of variegation 3-9 homolog 1 (Drosophila)                                        | 6839  | Hs.522639                             | 75.84         | 67.12       | -1.28       | 5.90E-03  |
| 205975_s_at | HOXD1    | homeobox D1                                                                                 | 3231  | Hs.83465                              | 169.78        | 150.97      | -1.26       | 5.90E-03  |
| 208000_at   | GML      | GPI anchored molecule like protein                                                          | 2765  | Hs.661218                             | 106.39        | 91.63       | -1.35       | 5.90E-03  |
| 201820_at   | KRT5     | keratin 5 (epidermolysis bullosa simplex, Dowling-Meara/Kobner/Weber-Cockayne types)        | 3852  | Hs.433845,<br>Hs.661062,<br>Hs.674382 | 53.24         | 45.36       | -1.38       | 5.90E-03  |
| 215210_s_at | DLSTP    | dihydrolipoamide S-succinyltransferase pseudogene (E2 component of 2-oxo-glutarate complex) | 1744  |                                       | 200.68        | 269.58      | 1.80        | 5.90E-03  |
| 208411_x_at | PPEF2    | protein phosphatase, EF-hand calcium                                                        | 5470  | Hs.290873                             | 13.04         | 12.02       | -1.18       | 5.90E-03  |

| Probe       | Symbol   | Description                                                            | Gene   | UniGene   | Av Exp Female | Av Exp Male | Fold Change | adj P val |
|-------------|----------|------------------------------------------------------------------------|--------|-----------|---------------|-------------|-------------|-----------|
|             |          | binding domain 2                                                       |        |           |               |             |             |           |
| 210189_at   | HSPA1L   | heat shock 70kDa protein 1-like                                        | 3305   | Hs.690634 | 86.01         | 75.05       | -1.31       | 6.18E-03  |
| 207161_at   | KIAA0087 | KIAA0087                                                               | 9808   | Hs.69749  | 14.15         | 13.00       | -1.19       | 6.18E-03  |
| 207597_at   | ADAM18   | ADAM metallopeptidase domain 18                                        | 8749   | Hs.127930 | 20.11         | 18.35       | -1.20       | 6.18E-03  |
| 204411_at   | KIF21B   | kinesin family member 21B                                              | 23046  | Hs.169182 | 116.46        | 101.56      | -1.31       | 6.22E-03  |
| 211475_s_at | BAG1     | BCL2-associated athanogene                                             | 573    | Hs.377484 | 331.84        | 410.56      | 1.53        | 6.27E-03  |
| 221843_s_at | KIAA1609 | KIAA1609                                                               | 57707  | Hs.288274 | 71.65         | 62.86       | -1.30       | 6.27E-03  |
| 215960_at   | SLC5A4   | solute carrier family 5 (low affinity glucose cotransporter), member 4 | 6527   | Hs.130101 | 36.34         | 33.00       | -1.21       | 6.27E-03  |
| 47571_at    | ZNF236   | zinc finger protein 236                                                | 7776   | Hs.189826 | 187.31        | 164.65      | -1.29       | 6.35E-03  |
| 213835_x_at | GTPBP3   | GTP binding protein 3 (mitochondrial)                                  | 84705  | Hs.334885 | 92.23         | 81.97       | -1.27       | 6.41E-03  |
| 221332_at   | BMP15    | bone morphogenetic protein 15                                          | 9210   | Hs.532692 | 49.13         | 42.78       | -1.32       | 6.41E-03  |
| 204711_at   | KIAA0753 | KIAA0753                                                               | 9851   | Hs.28070  | 107.54        | 95.88       | -1.26       | 6.42E-03  |
| 221703_at   | BRIP1    | BRCA1 interacting protein C-terminal helicase 1                        | 83990  | Hs.532799 | 16.10         | 14.75       | -1.19       | 6.47E-03  |
| 219614_s_at | SLC6A20  | solute carrier family 6 (proline IMINO transporter), member 20         | 54716  | Hs.413095 | 32.21         | 29.19       | -1.22       | 6.51E-03  |
| 211144_x_at | TARP     | TCR gamma alternate reading frame protein                              | 445347 | Hs.534032 | 79.64         | 67.30       | -1.40       | 6.51E-03  |
| 203860_at   | PCCA     | propionyl Coenzyme A carboxylase, alpha polypeptide                    | 5095   | Hs.80741  | 74.23         | 87.33       | 1.38        | 6.64E-03  |
| 203999_at   | SYT1     | synaptotagmin I                                                        | 6857   | Hs.310545 | 34.67         | 30.66       | -1.28       | 6.65E-03  |
| 205950_s_at | CA1      | carbonic anhydrase I                                                   | 759    | Hs.23118  | 107.71        | 95.77       | -1.26       | 6.69E-03  |
| 219381_at   | FLJ13231 | hypothetical protein FLJ13231                                          | 65250  | Hs.643420 | 18.27         | 16.66       | -1.20       | 6.69E-03  |
| 205730_s_at | ABLIM3   | actin binding LIM protein family, member 3                             | 22885  | Hs.49688  | 312.15        | 385.62      | 1.53        | 6.69E-03  |
| 217600_at   | SCUBE3   | signal peptide, CUB domain, EGF-like 3                                 | 222663 | Hs.12923  | 83.73         | 73.73       | -1.29       | 6.69E-03  |
| 217481_x_at | FLJ45455 | FLJ45455 protein                                                       | 388336 | Hs.663760 | 33.85         | 30.29       | -1.25       | 6.70E-03  |
| 213844_at   | HOXA5    | homeobox A5                                                            | 3202   | Hs.655218 | 47.27         | 40.62       | -1.35       | 6.70E-03  |
| 208098_at   | OR5V1    | olfactory receptor, family 5, subfamily V, member 1                    | 81696  | Hs.666316 | 31.23         | 26.48       | -1.39       | 6.70E-03  |
| 218271_s_at | PARL     | presenilin associated, rhomboid-like                                   | 55486  | Hs.478469 | 320.62        | 363.82      | 1.29        | 6.70E-03  |
| 209278_s_at | TFPI2    | tissue factor pathway                                                  | 7980   | Hs.438231 | 28.09         | 25.31       | -1.23       | 6.70E-03  |

| Probe       | Symbol   | Description                                                                                                      | Gene  | UniGene              | Av Exp Female | Av Exp Male | Fold Change | adj P val |
|-------------|----------|------------------------------------------------------------------------------------------------------------------|-------|----------------------|---------------|-------------|-------------|-----------|
|             |          | inhibitor 2                                                                                                      |       |                      |               |             |             |           |
| 219745_at   | TMEM180  | transmembrane protein 180                                                                                        | 79847 | Hs.309069            | 80.10         | 71.27       | -1.26       | 6.70E-03  |
| 200932_s_at | DCTN2    | dynactin 2 (p50)                                                                                                 | 10540 | Hs.289123            | 517.29        | 589.11      | 1.30        | 6.70E-03  |
| 220158_at   | LGALS14  | lectin, galactoside-binding, soluble, 14                                                                         | 56891 | Hs.24236             | 61.65         | 55.13       | -1.25       | 6.70E-03  |
| 219194_at   | SEMA4G   | sema domain, immunoglobulin domain (Ig), transmembrane domain (TM) and short cytoplasmic domain, (semaphorin) 4G | 57715 | Hs.591923            | 113.28        | 98.66       | -1.32       | 6.80E-03  |
| 217963_s_at | NGFRAP1  | nerve growth factor receptor (TNFRSF16) associated protein 1                                                     | 27018 | Hs.448588            | 1994.57       | 2330.16     | 1.36        | 6.81E-03  |
| 207733_x_at | PSG9     | pregnancy specific beta-1-glycoprotein 9                                                                         | 5678  | Hs.502092            | 102.07        | 91.05       | -1.26       | 6.81E-03  |
| 216042_at   | TNFRSF25 | tumor necrosis factor receptor superfamily, member 25                                                            | 8718  | Hs.462529            | 143.24        | 129.00      | -1.23       | 6.81E-03  |
| 205929_at   | GPA33    | glycoprotein A33 (transmembrane)                                                                                 | 10223 | Hs.651244            | 97.97         | 86.90       | -1.27       | 6.81E-03  |
| 206626_x_at | SSX1     | synovial sarcoma, X breakpoint 1                                                                                 | 6756  | Hs.434142, Hs.694472 | 89.42         | 79.69       | -1.26       | 6.82E-03  |
| 220421_at   | BTNL8    | butyrophilin-like 8                                                                                              | 79908 | Hs.189109            | 110.31        | 91.80       | -1.44       | 6.82E-03  |
| 206561_s_at | AKR1B10  | aldo-keto reductase family 1, member B10 (aldose reductase)                                                      | 57016 | Hs.116724            | 41.40         | 36.48       | -1.29       | 6.82E-03  |
| 207897_at   | CRHR2    | corticotropin releasing hormone receptor 2                                                                       | 1395  | Hs.546246            | 51.44         | 44.39       | -1.34       | 6.90E-03  |
| 213230_at   | CDR2L    | cerebellar degeneration-related protein 2-like                                                                   | 30850 | Hs.78358             | 155.94        | 179.81      | 1.33        | 6.90E-03  |
| 218250_s_at | CNOT7    | CCR4-NOT transcription complex, subunit 7                                                                        | 29883 | Hs.598387            | 226.55        | 300.00      | 1.75        | 6.93E-03  |
| 208585_at   | BTN2A3   | butyrophilin, subfamily 2, member A3                                                                             | 54718 | Hs.370522            | 61.13         | 54.44       | -1.26       | 6.93E-03  |
| 206914_at   | CRTAM    | cytotoxic and regulatory T cell molecule                                                                         | 56253 | Hs.159523            | 12.23         | 11.38       | -1.16       | 6.93E-03  |
| 220329_s_at | RMND1    | required for meiotic nuclear division 1 homolog ( <i>S. cerevisiae</i> )                                         | 55005 | Hs.486835            | 19.31         | 21.89       | 1.29        | 7.00E-03  |
| 202003_s_at | ACAA2    | acetyl-Coenzyme A acyltransferase 2 (mitochondrial 3-oxoacyl-Coenzyme A thiolase)                                | 10449 | Hs.200136            | 792.49        | 962.81      | 1.48        | 7.04E-03  |
| 211831_s_at | THPO     | thrombopoietin (myeloproliferative leukemia virus                                                                | 7066  | Hs.1166              | 39.46         | 35.60       | -1.23       | 7.04E-03  |

| Probe       | Symbol    | Description                                                                                       | Gene   | UniGene   | Av Exp Female | Av Exp Male | Fold Change | adj P val |
|-------------|-----------|---------------------------------------------------------------------------------------------------|--------|-----------|---------------|-------------|-------------|-----------|
|             |           | oncogene ligand, megakaryocyte growth and development factor)                                     |        |           |               |             |             |           |
| 218355_at   | KIF4A     | kinesin family member 4A                                                                          | 24137  | Hs.648326 | 32.70         | 28.46       | -1.32       | 7.04E-03  |
| 220766_at   | BTG4      | B-cell translocation gene 4                                                                       | 54766  | Hs.128180 | 34.08         | 30.19       | -1.27       | 7.04E-03  |
| 214842_s_at | ALB       | albumin                                                                                           | 213    | Hs.418167 | 23.14         | 20.60       | -1.26       | 7.09E-03  |
| 204850_s_at | DCX       | doublecortex; lissencephaly, X-linked (doublecortin)                                              | 1641   | Hs.34780  | 26.34         | 23.83       | -1.22       | 7.09E-03  |
| 220022_at   | ZNF334    | zinc finger protein 334                                                                           | 55713  | Hs.584933 | 13.09         | 12.05       | -1.18       | 7.09E-03  |
| 210739_x_at | SLC4A4    | solute carrier family 4, sodium bicarbonate cotransporter, member 4                               | 8671   | Hs.5462   | 148.90        | 126.50      | -1.39       | 7.09E-03  |
| 216476_at   | OR7E37P   | olfactory receptor, family 7, subfamily E, member 37 pseudogene                                   | 26636  |           | 97.90         | 89.21       | -1.20       | 7.09E-03  |
| 208154_at   | LOC51336  | mesenchymal stem cell protein DSCD28                                                              | 51336  | Hs.675523 | 14.33         | 13.21       | -1.18       | 7.09E-03  |
| 209497_s_at | RBM4B     | RNA binding motif protein 4B                                                                      | 83759  | Hs.656291 | 97.02         | 84.45       | -1.32       | 7.14E-03  |
| 220082_at   | PPP1R14D  | protein phosphatase 1, regulatory (inhibitor) subunit 14D                                         | 54866  | Hs.192927 | 104.86        | 93.09       | -1.27       | 7.14E-03  |
| 219461_at   | PAK6      | p21(CDKN1A)-activated kinase 6                                                                    | 56924  | Hs.513645 | 35.98         | 40.87       | 1.29        | 7.14E-03  |
| 217240_at   | LOC654056 | similar to Signal-regulatory protein beta-1 precursor (SIRP-beta-1)                               | 654056 |           | 121.56        | 102.58      | -1.40       | 7.15E-03  |
| 208285_at   | OR7A5     | olfactory receptor, family 7, subfamily A, member 5                                               | 26659  | Hs.137573 | 88.39         | 77.90       | -1.29       | 7.15E-03  |
| 210052_s_at | TPX2      | TPX2, microtubule-associated, homolog (Xenopus laevis)                                            | 22974  | Hs.244580 | 52.25         | 44.19       | -1.40       | 7.16E-03  |
| 71933_at    | WNT6      | wingless-type MMTV integration site family, member 6                                              | 7475   | Hs.29764  | 310.87        | 272.35      | -1.30       | 7.16E-03  |
| 219080_s_at | CTPS2     | CTP synthase II                                                                                   | 56474  | Hs.227049 | 24.01         | 21.96       | -1.20       | 7.16E-03  |
| 219271_at   | GALNT14   | UDP-N-acetyl-alpha-D-galactosamine: polypeptide N-acetylgalactosaminyltransferase 14 (GalNAc-T14) | 79623  | Hs.468058 | 61.22         | 52.22       | -1.37       | 7.16E-03  |
| 205831_at   | CD2       | CD2 molecule                                                                                      | 914    | Hs.523500 | 137.09        | 109.57      | -1.57       | 7.25E-03  |
| 211469_s_at | CXCR6     | chemokine (C-X-C                                                                                  | 10663  | Hs.34526  | 69.62         | 60.40       | -1.33       | 7.27E-03  |

| Probe       | Symbol  | Description                                                               | Gene  | UniGene                         | Av Exp Female | Av Exp Male | Fold Change | adj P val |
|-------------|---------|---------------------------------------------------------------------------|-------|---------------------------------|---------------|-------------|-------------|-----------|
|             |         | motif) receptor 6                                                         |       |                                 |               |             |             |           |
| 221397_at   | TAS2R10 | taste receptor, type 2, member 10                                         | 50839 | Hs.533756                       | 16.88         | 15.64       | -1.16       | 7.29E-03  |
| 220702_at   |         |                                                                           | 55480 |                                 | 19.26         | 17.51       | -1.21       | 7.37E-03  |
| 214567_s_at | XCL2    | chemokine (C motif) ligand 2                                              | 6846  | Hs.458346                       | 36.68         | 32.59       | -1.27       | 7.37E-03  |
| 210447_at   | GLUD2   | glutamate dehydrogenase 2                                                 | 2747  | Hs.368538                       | 13.08         | 12.31       | -1.13       | 7.37E-03  |
| 220424_at   | NPHS2   | nephrosis 2, idiopathic, steroid-resistant (podocin)                      | 7827  | Hs.412710                       | 107.76        | 92.77       | -1.35       | 7.37E-03  |
| 200642_at   | SOD1    | superoxide dismutase 1, soluble (amyotrophic lateral sclerosis 1 (adult)) | 6647  | Hs.443914                       | 1738.41       | 1983.88     | 1.30        | 7.37E-03  |
| 221313_at   | GPR52   | G protein-coupled receptor 52                                             | 9293  | Hs.673850                       | 88.92         | 74.82       | -1.41       | 7.40E-03  |
| 201471_s_at | SQSTM1  | sequestosome 1                                                            | 8878  | Hs.437277                       | 904.50        | 1032.27     | 1.30        | 7.45E-03  |
| 219741_x_at | ZNF552  | zinc finger protein 552                                                   | 79818 | Hs.560727                       | 97.56         | 85.32       | -1.31       | 7.45E-03  |
| 203147_s_at | TRIM14  | tripartite motif-containing 14                                            | 9830  | Hs.575631                       | 96.06         | 84.53       | -1.29       | 7.51E-03  |
| 201840_at   | NEDD8   | neural precursor cell expressed, developmentally down-regulated 8         | 4738  | Hs.531064, Hs.657248            | 493.99        | 586.02      | 1.41        | 7.55E-03  |
| 205318_at   | KIF5A   | kinesin family member 5A                                                  | 3798  | Hs.151219                       | 108.03        | 92.28       | -1.37       | 7.56E-03  |
| 217908_s_at | IQWD1   | IQ motif and WD repeats 1                                                 | 55827 | Hs.435741                       | 283.53        | 352.35      | 1.54        | 7.58E-03  |
| 219564_at   | KCNJ16  | potassium inwardly-rectifying channel, subfamily J, member 16             | 3773  | Hs.463985                       | 15.78         | 14.53       | -1.18       | 7.63E-03  |
| 202364_at   | MXI1    | MAX interactor 1                                                          | 4601  | Hs.501023, Hs.602078            | 457.17        | 563.61      | 1.52        | 7.64E-03  |
| 218233_s_at |         |                                                                           | 54772 |                                 | 884.79        | 1014.13     | 1.31        | 7.67E-03  |
| 220520_s_at | NUP62CL | nucleoporin 62kDa C-terminal like                                         | 54830 | Hs.163629                       | 17.33         | 15.90       | -1.19       | 7.72E-03  |
| 206928_at   | ZNF124  | zinc finger protein 124                                                   | 7678  | Hs.421238, Hs.651454, Hs.655205 | 23.90         | 21.32       | -1.26       | 7.72E-03  |
| 219464_at   | CA14    | carbonic anhydrase XIV                                                    | 23632 | Hs.528988                       | 125.50        | 107.86      | -1.35       | 7.78E-03  |
| 206235_at   | LIG4    | ligase IV, DNA, ATP-dependent                                             | 3981  | Hs.166091                       | 21.13         | 23.98       | 1.29        | 7.78E-03  |
| 221445_at   | OR1A2   | olfactory receptor, family 1, subfamily A, member 2                       | 26189 | Hs.532660                       | 35.03         | 30.34       | -1.33       | 7.78E-03  |
| 209249_s_at | GHITM   | growth hormone inducible transmembrane protein                            | 27069 | Hs.352656                       | 2186.40       | 2619.87     | 1.44        | 7.78E-03  |
| 208260_at   | AVPR1B  | arginine vasopressin                                                      | 553   | Hs.1372                         | 171.01        | 148.60      | -1.32       | 7.78E-03  |



| Probe       | Symbol    | Description                                                               | Gene   | UniGene   | Av Exp Female | Av Exp Male | Fold Change | adj P val |
|-------------|-----------|---------------------------------------------------------------------------|--------|-----------|---------------|-------------|-------------|-----------|
|             |           | receptor 1B                                                               |        |           |               |             |             |           |
| 214601_at   | TPH1      | tryptophan hydroxylase 1 (tryptophan 5-monooxygenase)                     | 7166   | Hs.591999 | 11.02         | 10.42       | -1.12       | 7.85E-03  |
| 219928_s_at | CABYR     | calcium binding tyrosine-(Y)-phosphorylation regulated (fibrousheathin 2) | 26256  | Hs.511983 | 31.12         | 27.79       | -1.25       | 7.85E-03  |
| 205821_at   | KLRK1     | killer cell lectin-like receptor subfamily K, member 1                    | 22914  | Hs.387787 | 166.23        | 141.48      | -1.38       | 7.85E-03  |
| 215396_at   | GPR98     | G protein-coupled receptor 98                                             | 84059  | Hs.591777 | 20.60         | 18.40       | -1.25       | 7.85E-03  |
| 220833_at   |           |                                                                           | 51169  |           | 57.83         | 50.12       | -1.33       | 7.85E-03  |
| 208868_s_at | GABARAPL1 | GABA(A) receptor-associated protein like 1                                | 23710  | Hs.524250 | 242.06        | 311.89      | 1.66        | 7.85E-03  |
| 209933_s_at | CD300A    | CD300a molecule                                                           | 11314  | Hs.9688   | 108.18        | 91.59       | -1.39       | 7.94E-03  |
| 218959_at   | HOXC10    | homeobox C10                                                              | 3226   | Hs.44276  | 47.88         | 42.36       | -1.28       | 7.94E-03  |
| 209394_at   | ASMTL     | acetylserotonin O-methyltransferase-like                                  | 8623   | Hs.533514 | 174.53        | 204.01      | 1.37        | 7.94E-03  |
| 221266_s_at | TM7SF4    | transmembrane 7 superfamily member 4                                      | 81501  | Hs.652230 | 82.40         | 72.89       | -1.28       | 8.00E-03  |
| 214950_at   | IL9R      | interleukin 9 receptor                                                    | 3581   | Hs.406228 | 135.46        | 121.51      | -1.24       | 8.20E-03  |
| 220194_at   | NSUN7     | NOL1/NOP2/Sun domain family, member 7                                     | 79730  | Hs.590923 | 24.37         | 21.82       | -1.25       | 8.20E-03  |
| 207725_at   | POU4F2    | POU class 4 homeobox 2                                                    | 5458   | Hs.266    | 17.16         | 15.29       | -1.26       | 8.24E-03  |
| 213240_s_at | KRT4      | keratin 4                                                                 | 3851   | Hs.654610 | 66.67         | 57.86       | -1.33       | 8.24E-03  |
| 201175_at   | TXNDC14   | thioredoxin domain containing 14                                          | 51075  | Hs.654965 | 327.24        | 382.31      | 1.36        | 8.25E-03  |
| 209861_s_at | METAP2    | methionyl aminopeptidase 2                                                | 10988  | Hs.591005 | 202.38        | 258.29      | 1.63        | 8.29E-03  |
| 215614_at   | LOC644974 | similar to beta-1,4-mannosyltransferase                                   | 644974 | Hs.653241 | 116.38        | 103.27      | -1.27       | 8.31E-03  |
| 221112_at   | IL1RAPL2  | interleukin 1 receptor accessory protein-like 2                           | 26280  | Hs.675519 | 121.91        | 107.10      | -1.30       | 8.39E-03  |
| 221073_s_at | NOD1      | nucleotide-binding oligomerization domain containing 1                    | 10392  | Hs.405153 | 270.91        | 244.59      | -1.23       | 8.49E-03  |
| 205648_at   | WNT2      | wingless-type MMTV integration site family member 2                       | 7472   | Hs.567356 | 118.21        | 105.81      | -1.25       | 8.49E-03  |
| 220395_at   | DNAJA4    | DnaJ (Hsp40) homolog, subfamily A, member 4                               | 55466  | Hs.513053 | 275.85        | 245.62      | -1.26       | 8.50E-03  |
| 209563_x_at | CALM1     | calmodulin 1 (phosphorylase kinase, delta)                                | 801    | Hs.282410 | 1085.97       | 1228.01     | 1.28        | 8.60E-03  |

| Probe       | Symbol  | Description                                                          | Gene   | UniGene                         | Av Exp Female | Av Exp Male | Fold Change | adj P val |
|-------------|---------|----------------------------------------------------------------------|--------|---------------------------------|---------------|-------------|-------------|-----------|
| 205825_at   | PCSK1   | proprotein convertase subtilisin/kexin type 1                        | 5122   | Hs.78977                        | 15.28         | 14.30       | -1.14       | 8.60E-03  |
| 219860_at   | LY6G5C  | lymphocyte antigen 6 complex, locus G5C                              | 80741  | Hs.25738                        | 47.50         | 41.88       | -1.29       | 8.60E-03  |
| 209297_at   | ITSN1   | intersectin 1 (SH3 domain protein)                                   | 6453   | Hs.160324                       | 243.96        | 267.81      | 1.21        | 8.60E-03  |
| 207064_s_at | AOC2    | amine oxidase, copper containing 2 (retina-specific)                 | 314    | Hs.143102                       | 39.97         | 35.75       | -1.25       | 8.60E-03  |
| 217187_at   | MUC5AC  | mucin 5AC, oligomeric mucus/gel-forming                              | 4586   | Hs.534332, Hs.558950, Hs.654574 | 256.94        | 212.27      | -1.47       | 8.60E-03  |
| 206342_x_at | IDS     | iduronate 2-sulfatase (Hunter syndrome)                              | 3423   | Hs.460960                       | 117.80        | 138.66      | 1.39        | 8.60E-03  |
| 208248_x_at | APLP2   | amyloid beta (A4) precursor-like protein 2                           | 334    | Hs.370247                       | 1172.92       | 1351.34     | 1.33        | 8.60E-03  |
| 202954_at   | UBE2C   | ubiquitin-conjugating enzyme E2C                                     | 11065  | Hs.93002                        | 105.88        | 91.39       | -1.34       | 8.60E-03  |
| 220977_x_at | EPB41L5 | erythrocyte membrane protein band 4.1 like 5                         | 57669  | Hs.654802                       | 55.31         | 48.63       | -1.29       | 8.60E-03  |
| 212341_at   | YIPF6   | Yip1 domain family, member 6                                         | 286451 | Hs.82719, Hs.694797             | 224.38        | 266.14      | 1.41        | 8.60E-03  |
| 221180_at   | YSK4    | yeast Sps1/Ste20-related kinase 4 (S. cerevisiae)                    | 80122  | Hs.659395                       | 255.87        | 224.53      | -1.30       | 8.60E-03  |
| 211201_at   | FSHR    | follicle stimulating hormone receptor                                | 2492   | Hs.1428                         | 30.56         | 27.13       | -1.27       | 8.62E-03  |
| 219968_at   | ZNF589  | zinc finger protein 589                                              | 51385  | Hs.172602                       | 129.68        | 116.11      | -1.25       | 8.62E-03  |
| 220223_at   | ATAD5   | ATPase family, AAA domain containing 5                               | 79915  | Hs.528902                       | 51.97         | 46.37       | -1.26       | 8.62E-03  |
| 206904_at   | MATN1   | matrilin 1, cartilage matrix protein                                 | 4146   | Hs.150366, Hs.617221            | 59.70         | 52.52       | -1.29       | 8.62E-03  |
| 201896_s_at | PSRC1   | proline/serine-rich coiled-coil 1                                    | 84722  | Hs.405925                       | 30.55         | 27.85       | -1.20       | 8.62E-03  |
| 206954_at   | WIT1    | Wilms tumor upstream neighbor 1                                      | 51352  | Hs.567499                       | 99.27         | 88.44       | -1.26       | 8.62E-03  |
| 203108_at   | GPRC5A  | G protein-coupled receptor, family C, group 5, member A              | 9052   | Hs.631733                       | 144.59        | 126.67      | -1.30       | 8.62E-03  |
| 206969_at   | KRT34   | keratin 34                                                           | 3885   | Hs.296942                       | 29.88         | 26.64       | -1.26       | 8.62E-03  |
| 220398_at   | GNPTAB  | N-acetylglucosamine-1-phosphate transferase, alpha and beta subunits | 79158  | Hs.46850                        | 78.04         | 69.46       | -1.26       | 8.62E-03  |
| 201652_at   | COP5    | COP9 constitutive photomorphogenic homolog subunit 5 (Arabidopsis)   | 10987  | Hs.491912                       | 393.18        | 485.91      | 1.53        | 8.62E-03  |
| 208273_at   | ZNF695  | zinc finger protein 695                                              | 57116  | Hs.669893                       | 25.58         | 22.90       | -1.25       | 8.62E-03  |
| 205900_at   | KRT1    | keratin 1 (epidermolytic hyperkeratosis)                             | 3848   | Hs.80828                        | 62.26         | 55.40       | -1.26       | 8.62E-03  |
| 218089_at   | C20orf4 | chromosome 20 open                                                   | 25980  | Hs.11314                        | 173.26        | 158.28      | -1.20       | 8.62E-03  |

| Probe       | Symbol    | Description                                                     | Gene   | UniGene              | Av Exp Female | Av Exp Male | Fold Change | adj P val |
|-------------|-----------|-----------------------------------------------------------------|--------|----------------------|---------------|-------------|-------------|-----------|
|             |           | reading frame 4                                                 |        |                      |               |             |             |           |
| 207429_at   | SLC22A2   | solute carrier family 22 (organic cation transporter), member 2 | 6582   | Hs.436385            | 89.83         | 77.17       | -1.36       | 8.62E-03  |
| 205230_at   | RPH3A     | rabphilin 3A homolog (mouse)                                    | 22895  | Hs.21239             | 59.09         | 54.11       | -1.19       | 8.62E-03  |
| 216408_at   | OR2B2     | olfactory receptor, family 2, subfamily B, member 2             | 81697  | Hs.553551            | 16.62         | 15.19       | -1.20       | 8.64E-03  |
| 205046_at   | CENPE     | centromere protein E, 312kDa                                    | 1062   | Hs.75573             | 40.56         | 34.95       | -1.35       | 8.67E-03  |
| 207633_s_at | MUSK      | muscle, skeletal, receptor tyrosine kinase                      | 4593   | Hs.521653            | 27.49         | 24.00       | -1.31       | 8.77E-03  |
| 219973_at   | ARSJ      | arylsulfatase family, member J                                  | 79642  | Hs.22895             | 18.56         | 17.46       | -1.13       | 8.77E-03  |
| 206299_at   | TMEM28    | transmembrane protein 28                                        | 27112  | Hs.87619             | 158.10        | 201.57      | 1.63        | 8.77E-03  |
| 221391_at   | TAS2R14   | taste receptor, type 2, member 14                               | 50840  | Hs.408153, Hs.679406 | 26.48         | 24.13       | -1.20       | 8.85E-03  |
| 220106_at   | NPC1L1    | NPC1 (Niemann-Pick disease, type C1, gene)-like 1               | 29881  | Hs.567486            | 80.59         | 71.02       | -1.29       | 8.86E-03  |
| 206282_at   | NEUROD1   | neurogenic differentiation 1                                    | 4760   | Hs.440955, Hs.574626 | 28.76         | 26.03       | -1.22       | 8.90E-03  |
| 221465_at   | OR6A2     | olfactory receptor, family 6, subfamily A, member 2             | 8590   | Hs.652252            | 71.46         | 62.93       | -1.29       | 9.16E-03  |
| 207908_at   | KRT2      | keratin 2 (epidermal ichthyosis bullosa of Siemens)             | 3849   | Hs.707               | 84.70         | 73.03       | -1.35       | 9.16E-03  |
| 207787_at   | KRT33B    | keratin 33B                                                     | 3884   | Hs.32950             | 60.06         | 53.11       | -1.28       | 9.16E-03  |
| 217568_at   | FAM12A    | family with sequence similarity 12, member A                    | 10876  | Hs.304757            | 30.27         | 26.17       | -1.34       | 9.19E-03  |
| 211036_x_at | ANAPC5    | anaphase promoting complex subunit 5                            | 51433  | Hs.7101              | 559.91        | 618.29      | 1.22        | 9.22E-03  |
| 215761_at   | DMXL2     | Dmx-like 2                                                      | 23312  | Hs.511386            | 87.31         | 74.47       | -1.37       | 9.22E-03  |
| 210130_s_at | TM7SF2    | transmembrane 7 superfamily member 2                            | 7108   | Hs.31130             | 260.33        | 317.94      | 1.49        | 9.22E-03  |
| 220645_at   | FAM55D    | family with sequence similarity 55, member D                    | 54827  | Hs.179100, Hs.668531 | 65.00         | 58.09       | -1.25       | 9.22E-03  |
| 206785_s_at | KLRC2     | killer cell lectin-like receptor subfamily C, member 2          | 3822   | Hs.591157            | 12.74         | 11.86       | -1.15       | 9.22E-03  |
| 207759_s_at |           |                                                                 | 80138  |                      | 28.76         | 25.69       | -1.25       | 9.22E-03  |
| 217374_x_at | TRGV5     | T cell receptor gamma variable 5                                | 6978   | Hs.534032            | 62.73         | 55.55       | -1.28       | 9.36E-03  |
| 221302_at   | KLF15     | Kruppel-like factor 15                                          | 28999  | Hs.272215            | 174.80        | 153.51      | -1.30       | 9.36E-03  |
| 217376_at   | LOC441938 | similar to Signal-regulatory protein                            | 441938 | Hs.651103            | 116.47        | 101.35      | -1.32       | 9.50E-03  |

| Probe       | Symbol   | Description                                                                                 | Gene   | UniGene                         | Av Exp Female | Av Exp Male | Fold Change | adj P val |
|-------------|----------|---------------------------------------------------------------------------------------------|--------|---------------------------------|---------------|-------------|-------------|-----------|
|             |          | gamma precursor (Signal-regulatory protein beta-2) (SIRP-beta-2) (SIRP-b2) (CD172g antigen) |        |                                 |               |             |             |           |
| 211231_x_at | CYP4A11  | cytochrome P450, family 4, subfamily A, polypeptide 11                                      | 1579   | Hs.1645, Hs.567807              | 166.11        | 148.38      | -1.25       | 9.50E-03  |
| 200942_s_at | HSBP1    | heat shock factor binding protein 1                                                         | 3281   | Hs.250899                       | 676.54        | 787.10      | 1.35        | 9.50E-03  |
| 207519_at   | SLC6A4   | solute carrier family 6 (neurotransmitter transporter, serotonin), member 4                 | 6532   | Hs.591192                       | 85.69         | 75.99       | -1.27       | 9.50E-03  |
| 221297_at   | GPRC5D   | G protein-coupled receptor, family C, group 5, member D                                     | 55507  | Hs.644599                       | 92.42         | 81.67       | -1.28       | 9.50E-03  |
| 215315_at   | ZNF549   | zinc finger protein 549                                                                     | 256051 | Hs.564295                       | 17.75         | 16.18       | -1.20       | 9.50E-03  |
| 207944_at   | LOC4951  | parvalbumin                                                                                 | 4951   | Hs.510456                       | 31.04         | 28.13       | -1.22       | 9.50E-03  |
| 215881_x_at | SSX3     | synovial sarcoma, X breakpoint 3                                                            | 10214  | Hs.558445                       | 103.68        | 93.67       | -1.23       | 9.53E-03  |
| 207774_at   |          |                                                                                             | 80087  |                                 | 53.17         | 47.68       | -1.24       | 9.56E-03  |
| 216677_at   | ZNF154   | zinc finger protein 154                                                                     | 7710   | Hs.646378                       | 61.93         | 55.65       | -1.24       | 9.56E-03  |
| 200983_x_at | CD59     | CD59 molecule, complement regulatory protein                                                | 966    | Hs.278573, Hs.653685, Hs.693685 | 1061.48       | 1313.09     | 1.53        | 9.56E-03  |
| 219904_at   | ZSCAN5   | zinc finger and SCAN domain containing 5                                                    | 79149  | Hs.177688                       | 62.72         | 57.78       | -1.18       | 9.56E-03  |
| 38158_at    | ESPL1    | extra spindle pole bodies homolog 1 (S. cerevisiae)                                         | 9700   | Hs.153479                       | 97.19         | 86.88       | -1.25       | 9.56E-03  |
| 206057_x_at | SPN      | sialophorin (leukosialin, CD43)                                                             | 6693   | Hs.632188                       | 162.79        | 141.91      | -1.32       | 9.68E-03  |
| 208106_x_at | PSG6     | pregnancy specific beta-1-glycoprotein 6                                                    | 5675   | Hs.654414                       | 111.55        | 97.04       | -1.32       | 9.81E-03  |
| 205753_at   | CRP      | C-reactive protein, pentraxin-related                                                       | 1401   | Hs.76452, Hs.694799             | 45.39         | 40.43       | -1.26       | 9.90E-03  |
| 213496_at   | LPPR4    | plasticity related gene 1                                                                   | 9890   | Hs.13245                        | 18.38         | 16.74       | -1.21       | 9.90E-03  |
| 219727_at   | DUOX2    | dual oxidase 2                                                                              | 50506  | Hs.71377                        | 49.37         | 45.08       | -1.20       | 0.010     |
| 214465_at   | ORM2     | orosomuroid 2                                                                               | 5005   | Hs.522356                       | 20.45         | 18.60       | -1.21       | 0.010     |
| 220011_at   | C1orf135 | chromosome 1 open reading frame 135                                                         | 79000  | Hs.149305                       | 65.55         | 57.26       | -1.31       | 0.010     |
| 207240_s_at | LHCGR    | luteinizing hormone/choriagonadotropin receptor                                             | 3973   | Hs.468490                       | 14.23         | 13.21       | -1.16       | 0.010     |
| 202635_s_at | POLR2K   | polymerase (RNA) II (DNA directed) polypeptide K, 7.0kDa                                    | 5440   | Hs.351475                       | 219.50        | 279.51      | 1.62        | 0.010     |
| 211359_s_at | OPRM1    | opioid receptor, mu 1                                                                       | 4988   | Hs.2353                         | 60.91         | 53.52       | -1.30       | 0.010     |
| 220806_x_at | GNG13    | guanine nucleotide                                                                          | 51764  | Hs.247888                       | 29.29         | 26.46       | -1.23       | 0.010     |

| Probe       | Symbol  | Description                                                                                                              | Gene   | UniGene                 | Av Exp Female | Av Exp Male | Fold Change | adj P val |
|-------------|---------|--------------------------------------------------------------------------------------------------------------------------|--------|-------------------------|---------------|-------------|-------------|-----------|
| 208179_x_at | KIR2DL3 | binding protein (G protein), gamma 13<br>killer cell immunoglobulin-like receptor, two domains, long cytoplasmic tail, 3 | 3804   | Hs.654605,<br>Hs.654608 | 78.74         | 70.39       | -1.25       | 0.010     |
| 220783_at   | MMP27   | matrix metalloproteinase 27                                                                                              | 64066  | Hs.534479               | 27.83         | 25.24       | -1.22       | 0.011     |
| 206837_at   | ALX1    | ALX homeobox 1                                                                                                           | 8092   | Hs.41683                | 30.96         | 27.88       | -1.23       | 0.011     |
| 201628_s_at | RRAGA   | Ras-related GTP binding A                                                                                                | 10670  | Hs.432330               | 504.42        | 580.43      | 1.32        | 0.011     |
| 207200_at   | OTC     | ornithine carbamoyltransferase                                                                                           | 5009   | Hs.117050               | 34.83         | 28.30       | -1.52       | 0.011     |
| 206713_at   | NTNG1   | netrin G1                                                                                                                | 22854  | Hs.657434               | 85.11         | 73.65       | -1.34       | 0.011     |
| 207075_at   | NLRP3   | NLR family, pyrin domain containing 3                                                                                    | 114548 | Hs.159483               | 31.97         | 28.08       | -1.30       | 0.011     |
| 220627_at   | CST8    | cystatin 8 (cystatin-related epididymal specific)                                                                        | 10047  | Hs.121602               | 50.93         | 44.71       | -1.30       | 0.011     |
| 201077_s_at | NHP2L1  | NHP2 non-histone chromosome protein 2-like 1 ( <i>S. cerevisiae</i> )                                                    | 4809   | Hs.182255               | 787.27        | 903.27      | 1.32        | 0.011     |
| 216615_s_at | HTR3A   | 5-hydroxytryptamine (serotonin) receptor 3A                                                                              | 3359   | Hs.413899               | 116.91        | 103.34      | -1.28       | 0.011     |
| 217797_at   | UFC1    | ubiquitin-fold modifier conjugating enzyme 1                                                                             | 51506  | Hs.301412               | 349.17        | 404.76      | 1.34        | 0.011     |
| 217677_at   | PLEKHA2 | pleckstrin homology domain containing, family A (phosphoinositide binding specific) member 2                             | 59339  | Hs.369123               | 27.67         | 25.10       | -1.22       | 0.011     |
| 206707_x_at | C6orf32 | chromosome 6 open reading frame 32                                                                                       | 9750   | Hs.559459               | 59.20         | 51.48       | -1.32       | 0.011     |
| 205625_s_at | CALB1   | calbindin 1, 28kDa                                                                                                       | 793    | Hs.65425                | 24.33         | 22.32       | -1.19       | 0.011     |
| 208283_at   | GAGE1   | G antigen 1                                                                                                              | 2543   | Hs.632815               | 18.74         | 17.00       | -1.22       | 0.011     |
| 210853_at   | SCN11A  | sodium channel, voltage-gated, type XI, alpha subunit                                                                    | 11280  | Hs.591657               | 26.78         | 24.69       | -1.18       | 0.011     |
| 220622_at   | LRRC31  | leucine rich repeat containing 31                                                                                        | 79782  | Hs.411295               | 20.46         | 18.44       | -1.23       | 0.011     |
| 205014_at   | FGFBP1  | fibroblast growth factor binding protein 1                                                                               | 9982   | Hs.1690                 | 81.93         | 73.95       | -1.23       | 0.011     |
| 202416_at   | DNAJC7  | DnaJ (Hsp40) homolog, subfamily C, member 7                                                                              | 7266   | Hs.500156               | 155.03        | 201.07      | 1.68        | 0.011     |
| 207911_s_at | TGM5    | transglutaminase 5                                                                                                       | 9333   | Hs.129719               | 174.43        | 154.10      | -1.28       | 0.011     |
| 209586_s_at | PRUNE   | prune homolog ( <i>Drosophila</i> )                                                                                      | 58497  | Hs.78524                | 274.01        | 321.86      | 1.38        | 0.011     |
| 218557_at   | NIT2    | nitrilase family, member 2                                                                                               | 56954  | Hs.439152               | 190.84        | 216.73      | 1.29        | 0.011     |

| Probe       | Symbol        | Description                                                                                        | Gene   | UniGene              | Av Exp Female | Av Exp Male | Fold Change | adj P val |
|-------------|---------------|----------------------------------------------------------------------------------------------------|--------|----------------------|---------------|-------------|-------------|-----------|
| 220485_s_at | SIRPG         | signal-regulatory protein gamma                                                                    | 55423  | Hs.590883            | 32.46         | 27.73       | -1.37       | 0.011     |
| 202313_at   | PPP2R2A       | protein phosphatase 2 (formerly 2A), regulatory subunit B, alpha isoform                           | 5520   | Hs.146339            | 303.76        | 350.66      | 1.33        | 0.011     |
| 219091_s_at | MMRN2         | multimerin 2                                                                                       | 79812  | Hs.524479            | 125.35        | 145.07      | 1.34        | 0.011     |
| 204614_at   | SERPINB2      | serpin peptidase inhibitor, clade B (ovalbumin), member 2                                          | 5055   | Hs.594481            | 21.55         | 19.28       | -1.25       | 0.011     |
| 202640_s_at | RANBP3        | RAN binding protein 3                                                                              | 8498   | Hs.531752            | 159.21        | 175.54      | 1.22        | 0.011     |
| 215040_at   | RNASEH2B      | ribonuclease H2, subunit B                                                                         | 79621  | Hs.306291            | 180.22        | 156.46      | -1.33       | 0.011     |
| 219642_s_at | PEX5L         | peroxisomal biogenesis factor 5-like                                                               | 51555  | Hs.478393            | 23.19         | 20.94       | -1.23       | 0.011     |
| 216773_at   | COMMD1        | copper metabolism (Murr1) domain containing 1                                                      | 150684 | Hs.468702            | 27.52         | 25.64       | -1.15       | 0.011     |
| 220721_at   | ZNF614        | zinc finger protein 614                                                                            | 80110  | Hs.292336            | 40.12         | 35.98       | -1.24       | 0.011     |
| 218526_s_at | RANGRF        | RAN guanine nucleotide release factor                                                              | 29098  | Hs.408233            | 156.85        | 179.35      | 1.31        | 0.011     |
| 211607_x_at | EGFR          | epidermal growth factor receptor (erythroblastic leukemia viral (v-erb-b) oncogene homolog, avian) | 1956   | Hs.488293            | 175.54        | 155.20      | -1.28       | 0.011     |
| 215467_x_at | LOC647070     | hypothetical LOC647070                                                                             | 647070 | Hs.660884            | 73.83         | 64.68       | -1.30       | 0.011     |
| 206643_at   | HAL           | histidine ammonia-lyase                                                                            | 3034   | Hs.190783            | 29.84         | 26.12       | -1.30       | 0.011     |
| 206429_at   | F2RL1         | coagulation factor II (thrombin) receptor-like 1                                                   | 2150   | Hs.154299            | 86.05         | 77.12       | -1.25       | 0.011     |
| 206349_at   | LGI1          | leucine-rich, glioma inactivated 1                                                                 | 9211   | Hs.533670            | 14.78         | 13.68       | -1.17       | 0.011     |
| 213199_at   | DKFZP586P0123 | hypothetical protein                                                                               | 26005  | Hs.557938, Hs.694798 | 70.35         | 62.68       | -1.26       | 0.011     |
| 203916_at   | NDST2         | N-deacetylase/N-sulfotransferase (heparan glucosaminy) 2                                           | 8509   | Hs.654758            | 174.45        | 157.02      | -1.23       | 0.012     |
| 211545_at   | GHRHR         | growth hormone releasing hormone receptor                                                          | 2692   | Hs.767               | 68.44         | 60.33       | -1.29       | 0.012     |
| 215756_at   | LOC730227     | hypothetical protein LOC730227                                                                     | 730227 | Hs.293928            | 88.26         | 78.11       | -1.28       | 0.012     |
| 216738_at   | HRH1          | histamine receptor H1                                                                              | 3269   | Hs.1570, Hs.657237   | 96.71         | 83.30       | -1.35       | 0.012     |
| 218622_at   | NUP37         | nucleoporin 37kDa                                                                                  | 79023  | Hs.444276            | 80.72         | 94.71       | 1.38        | 0.012     |
| 205344_at   | CSPG5         | chondroitin sulfate proteoglycan 5                                                                 | 10675  | Hs.45127             | 151.29        | 137.36      | -1.21       | 0.012     |

| Probe       | Symbol  | Description                                                              | Gene   | UniGene              | Av Exp Female | Av Exp Male | Fold Change | adj P val |
|-------------|---------|--------------------------------------------------------------------------|--------|----------------------|---------------|-------------|-------------|-----------|
|             |         | (neuroglycan C)                                                          |        |                      |               |             |             |           |
| 221236_s_at | STMN4   | stathmin-like 4                                                          | 81551  | Hs.201058            | 43.36         | 37.75       | -1.32       | 0.012     |
| 215484_at   | TRIM3   | tripartite motif-containing 3                                            | 10612  | Hs.591992            | 102.38        | 87.11       | -1.38       | 0.012     |
| 207126_x_at | UGT1A1  | UDP glucuronosyltransferase 1 family, polypeptide A1                     | 54658  | Hs.654499            | 66.09         | 60.59       | -1.19       | 0.012     |
| 203554_x_at | PTTG1   | pituitary tumor-transforming 1                                           | 9232   | Hs.350966            | 193.42        | 167.27      | -1.34       | 0.012     |
| 220897_at   |         |                                                                          | 80029  |                      | 17.27         | 16.09       | -1.15       | 0.012     |
| 208448_x_at | IFNA16  | interferon, alpha 16                                                     | 3449   | Hs.56303             | 34.93         | 31.56       | -1.22       | 0.012     |
| 221399_at   | EDA2R   | ectodysplasin A2 receptor                                                | 60401  | Hs.302017            | 84.71         | 75.61       | -1.26       | 0.012     |
| 218826_at   | SLC35F2 | solute carrier family 35, member F2                                      | 54733  | Hs.524014            | 56.94         | 50.35       | -1.28       | 0.012     |
| 209629_s_at | NXT2    | nuclear transport factor 2-like export factor 2                          | 55916  | Hs.25010             | 31.10         | 27.61       | -1.27       | 0.012     |
| 202705_at   | CCNB2   | cyclin B2                                                                | 9133   | Hs.194698            | 73.43         | 64.07       | -1.31       | 0.012     |
| 220615_s_at | MLSTD1  | male sterility domain containing 1                                       | 55711  | Hs.298851            | 57.33         | 50.66       | -1.28       | 0.012     |
| 205834_s_at | PART1   | prostate androgen-regulated transcript 1                                 | 25859  | Hs.661347            | 93.38         | 82.31       | -1.29       | 0.012     |
| 219542_at   | NEK11   | NIMA (never in mitosis gene a)- related kinase 11                        | 79858  | Hs.657336            | 79.81         | 68.71       | -1.35       | 0.012     |
| 203966_s_at | PPM1A   | protein phosphatase 1A (formerly 2C), magnesium-dependent, alpha isoform | 5494   | Hs.592298            | 288.13        | 333.99      | 1.34        | 0.012     |
| 206137_at   | RIMS2   | regulating synaptic membrane exocytosis 2                                | 9699   | Hs.655271, Hs.675990 | 64.68         | 58.09       | -1.24       | 0.012     |
| 219165_at   | PDLIM2  | PDZ and LIM domain 2 (mystique)                                          | 64236  | Hs.632034            | 68.13         | 85.81       | 1.59        | 0.012     |
| 215523_at   | ZNF391  | zinc finger protein 391                                                  | 346157 | Hs.651176, Hs.680366 | 17.35         | 15.78       | -1.21       | 0.012     |
| 220957_at   | CTAGE1  | cutaneous T-cell lymphoma-associated antigen 1                           | 64693  | Hs.406709            | 18.21         | 16.39       | -1.23       | 0.012     |
| 203702_s_at | TTL4    | tubulin tyrosine ligase-like family, member 4                            | 9654   | Hs.471405            | 57.87         | 51.87       | -1.24       | 0.012     |
| 220958_at   | ULK4    | unc-51-like kinase 4 (C. elegans)                                        | 54986  | Hs.656192            | 42.81         | 38.25       | -1.25       | 0.012     |
| 207443_at   | NR2E1   | nuclear receptor subfamily 2, group E, member 1                          | 7101   | Hs.157688            | 41.79         | 37.24       | -1.26       | 0.012     |
| 221670_s_at | LHX3    | LIM homeobox 3                                                           | 8022   | Hs.148427            | 188.97        | 167.76      | -1.27       | 0.012     |
| 204868_at   | ICT1    | immature colon carcinoma transcript 1                                    | 3396   | Hs.407955            | 154.27        | 180.96      | 1.38        | 0.012     |
| 215515_at   | KIRREL  | kin of IRRE like                                                         | 55243  | Hs.609291,           | 80.87         | 70.52       | -1.32       | 0.012     |

| Probe       | Symbol  | Description                                                                       | Gene  | UniGene              | Av Exp Female | Av Exp Male | Fold Change | adj P val |
|-------------|---------|-----------------------------------------------------------------------------------|-------|----------------------|---------------|-------------|-------------|-----------|
|             |         | (Drosophila)                                                                      |       | Hs.657006            |               |             |             |           |
| 217483_at   | FOLH1   | folate hydrolase (prostate-specific membrane antigen) 1                           | 2346  | Hs.654487            | 68.22         | 61.55       | -1.23       | 0.012     |
| 212403_at   | UBE3B   | ubiquitin protein ligase E3B                                                      | 89910 | Hs.374067            | 191.59        | 220.60      | 1.33        | 0.012     |
| 214642_x_at | MAGEA5  | melanoma antigen family A, 5                                                      | 4104  | Hs.668021            | 24.97         | 23.36       | -1.14       | 0.012     |
| 206708_at   | FOXN2   | forkhead box N2                                                                   | 3344  | Hs.468478            | 31.45         | 28.14       | -1.25       | 0.012     |
| 219939_s_at | CSDE1   | cold shock domain containing E1, RNA-binding                                      | 7812  | Hs.69855             | 1292.41       | 1666.59     | 1.66        | 0.012     |
| 207093_s_at | OMG     | oligodendrocyte myelin glycoprotein                                               | 4974  | Hs.113874            | 135.61        | 121.85      | -1.24       | 0.012     |
| 206625_at   | PRPH2   | peripherin 2 (retinal degeneration, slow)                                         | 5961  | Hs.654489            | 104.25        | 94.37       | -1.22       | 0.012     |
| 207462_at   | GLRA2   | glycine receptor, alpha 2                                                         | 2742  | Hs.2700              | 68.98         | 60.88       | -1.28       | 0.012     |
| 207600_at   | KCNC3   | potassium voltage-gated channel, Shaw-related subfamily, member 3                 | 3748  | Hs.467146            | 63.05         | 56.98       | -1.22       | 0.013     |
| 221451_s_at | OR2W1   | olfactory receptor, family 2, subfamily W, member 1                               | 26692 | Hs.553526            | 23.01         | 21.03       | -1.20       | 0.013     |
| 201982_s_at | PAPPA   | pregnancy-associated plasma protein A, pappalysin 1                               | 5069  | Hs.643599, Hs.694735 | 84.25         | 75.43       | -1.25       | 0.013     |
| 217305_s_at | SAC     | testicular soluble adenylyl cyclase                                               | 55811 | Hs.320892            | 29.44         | 27.39       | -1.16       | 0.013     |
| 213338_at   | TMEM158 | transmembrane protein 158                                                         | 25907 | Hs.35861             | 29.84         | 26.45       | -1.27       | 0.013     |
| 207230_at   | CDON    | Cdon homolog (mouse)                                                              | 50937 | Hs.38034             | 85.48         | 76.26       | -1.26       | 0.013     |
| 216907_x_at | KIR3DL2 | killer cell immunoglobulin-like receptor, three domains, long cytoplasmic tail, 2 | 3812  | Hs.645228, Hs.645532 | 44.69         | 39.96       | -1.25       | 0.013     |
| 210261_at   | KCNK2   | potassium channel, subfamily K, member 2                                          | 3776  | Hs.497745            | 27.10         | 24.74       | -1.20       | 0.013     |
| 209860_s_at | ANXA7   | annexin A7                                                                        | 310   | Hs.631827            | 317.73        | 385.91      | 1.48        | 0.013     |
| 219715_s_at | TDP1    | tyrosyl-DNA phosphodiesterase 1                                                   | 55775 | Hs.209945            | 57.22         | 52.12       | -1.21       | 0.013     |
| 207143_at   | CDK6    | cyclin-dependent kinase 6                                                         | 1021  | Hs.119882            | 55.01         | 47.90       | -1.32       | 0.013     |
| 215704_at   | FLG     | filaggrin                                                                         | 2312  | Hs.654510            | 13.41         | 12.72       | -1.11       | 0.013     |
| 202645_s_at | MEN1    | multiple endocrine neoplasia 1                                                    | 4221  | Hs.423348            | 101.34        | 91.02       | -1.24       | 0.013     |
| 206833_s_at | ACYP2   | acylphosphatase 2, muscle type                                                    | 98    | Hs.516173, Hs.642983 | 245.08        | 305.30      | 1.55        | 0.013     |



| Probe       | Symbol       | Description                                                                    | Gene  | UniGene              | Av Exp Female | Av Exp Male | Fold Change | adj P val |
|-------------|--------------|--------------------------------------------------------------------------------|-------|----------------------|---------------|-------------|-------------|-----------|
| 48659_at    | RP5-1077B9.4 | invasion inhibitory protein 45                                                 | 60672 | Hs.8595              | 210.66        | 190.61      | -1.22       | 0.013     |
| 220133_at   | ODAM         | odontogenic, ameloblast associated                                             | 54959 | Hs.143811            | 32.69         | 29.28       | -1.25       | 0.013     |
| 220029_at   | ELOVL2       | elongation of very long chain fatty acids (FEN1/Elo2, SUR4/Elo3, yeast)-like 2 | 54898 | Hs.656436            | 49.52         | 44.16       | -1.26       | 0.013     |
| 204770_at   | TAP2         | transporter 2, ATP-binding cassette, sub-family B (MDR/TAP)                    | 6891  | Hs.502               | 73.43         | 63.32       | -1.34       | 0.013     |
| 201256_at   | COX7A2L      | cytochrome c oxidase subunit VIIa polypeptide 2 like                           | 9167  | Hs.339639            | 647.18        | 727.58      | 1.26        | 0.013     |
| 207400_at   | NPY5R        | neuropeptide Y receptor Y5                                                     | 4889  | Hs.519058, Hs.598503 | 50.80         | 45.45       | -1.25       | 0.013     |
| 204454_at   | LDOC1        | leucine zipper, down-regulated in cancer 1                                     | 23641 | Hs.45231             | 142.59        | 126.31      | -1.27       | 0.013     |
| 220743_at   | C16orf72     | chromosome 16 open reading frame 72                                            | 29035 | Hs.221497            | 121.14        | 106.60      | -1.29       | 0.013     |
| 205785_at   | ITGAM        | integrin, alpha M (complement component 3 receptor 3 subunit)                  | 3684  | Hs.172631            | 64.54         | 57.60       | -1.26       | 0.013     |
| 214639_s_at | HOXA1        | homeobox A1                                                                    | 3198  | Hs.67397             | 30.28         | 26.63       | -1.29       | 0.013     |
| 220542_s_at | PLUNC        | palate, lung and nasal epithelium carcinoma associated                         | 51297 | Hs.211092            | 131.09        | 116.08      | -1.28       | 0.013     |
| 206849_at   | GABRG2       | gamma-aminobutyric acid (GABA) A receptor, gamma 2                             | 2566  | Hs.7195              | 29.69         | 25.93       | -1.31       | 0.013     |
| 217245_at   | EPAG         | early lymphoid activation protein                                              | 10824 | Hs.654372            | 33.13         | 28.56       | -1.35       | 0.013     |
| 206478_at   | KIAA0125     | KIAA0125                                                                       | 9834  | Hs.632338, Hs.649259 | 45.18         | 39.89       | -1.28       | 0.013     |
| 206939_at   | DCC          | deleted in colorectal carcinoma                                                | 1630  | Hs.694733            | 45.49         | 39.56       | -1.32       | 0.013     |
| 215582_x_at | MCM3AP       | minichromosome maintenance complex component 3 associated protein              | 8888  | Hs.389037            | 163.15        | 140.62      | -1.35       | 0.013     |
| 219685_at   | TMEM35       | transmembrane protein 35                                                       | 59353 | Hs.45140             | 27.82         | 25.13       | -1.23       | 0.013     |
| 208737_at   | ATP6V1G1     | ATPase, H+ transporting, lysosomal 13kDa, V1 subunit G1                        | 9550  | Hs.388654            | 337.36        | 429.27      | 1.62        | 0.013     |
| 216895_at   | GABRG3       | gamma-aminobutyric acid (GABA) A receptor, gamma 3                             | 2567  | Hs.569475, Hs.592027 | 21.51         | 19.46       | -1.22       | 0.013     |
| 201522_x_at | SNRPN        | small nuclear ribonucleoprotein                                                | 6638  | Hs.564847, Hs.632166 | 2231.66       | 2539.96     | 1.30        | 0.013     |

| Probe       | Symbol  | Description                                                                     | Gene  | UniGene              | Av Exp Female | Av Exp Male | Fold Change | adj P val |
|-------------|---------|---------------------------------------------------------------------------------|-------|----------------------|---------------|-------------|-------------|-----------|
|             |         | polypeptide N                                                                   |       |                      |               |             |             |           |
| 205752_s_at | GSTM5   | glutathione S-transferase M5                                                    | 2949  | Hs.75652             | 159.02        | 140.32      | -1.28       | 0.013     |
| 206104_at   | ISL1    | ISL LIM homeobox 1                                                              | 3670  | Hs.505               | 19.50         | 17.64       | -1.22       | 0.013     |
| 213601_at   | SLIT1   | slit homolog 1 (Drosophila)                                                     | 6585  | Hs.632082            | 83.71         | 75.08       | -1.24       | 0.013     |
| 204529_s_at | TOX     | thymocyte selection-associated high mobility group box                          | 9760  | Hs.491805, Hs.634856 | 17.17         | 15.01       | -1.31       | 0.013     |
| 204087_s_at | SLC5A6  | solute carrier family 5 (sodium-dependent vitamin transporter), member 6        | 8884  | Hs.435735            | 150.97        | 136.11      | -1.23       | 0.013     |
| 216058_s_at | CYP2C19 | cytochrome P450, family 2, subfamily C, polypeptide 19                          | 1557  | Hs.282409            | 50.55         | 45.72       | -1.22       | 0.013     |
| 215745_at   | NOL14   | nucleolar protein 14                                                            | 8602  | Hs.694747            | 36.62         | 32.99       | -1.23       | 0.013     |
| 210040_at   | SLC12A5 | solute carrier family 12, (potassium-chloride transporter) member 5             | 57468 | Hs.21413             | 49.67         | 43.11       | -1.33       | 0.013     |
| 220148_at   | ALDH8A1 | aldehyde dehydrogenase 8 family, member A1                                      | 64577 | Hs.486520            | 14.39         | 13.65       | -1.11       | 0.013     |
| 215491_at   | MYCL1   | v-myc myelocytomatosis viral oncogene homolog 1, lung carcinoma derived (avian) | 4610  | Hs.437922            | 159.29        | 143.89      | -1.23       | 0.013     |
| 216275_at   | BUB1    | BUB1 budding uninhibited by benzimidazoles 1 homolog (yeast)                    | 699   | Hs.469649            | 98.09         | 87.92       | -1.24       | 0.013     |
| 213036_x_at | ATP2A3  | ATPase, Ca++ transporting, ubiquitous                                           | 489   | Hs.513870            | 183.97        | 165.10      | -1.24       | 0.013     |
| 220790_s_at | MS4A5   | membrane-spanning 4-domains, subfamily A, member 5                              | 64232 | Hs.178066            | 51.00         | 44.61       | -1.31       | 0.013     |
| 221165_s_at | IL22    | interleukin 22                                                                  | 50616 | Hs.287369            | 123.81        | 113.10      | -1.20       | 0.013     |
| 221092_at   | IKZF3   | IKAROS family zinc finger 3 (Aiolos)                                            | 22806 | Hs.444388            | 15.82         | 14.37       | -1.21       | 0.013     |
| 216879_at   | HR44    | Hr44 antigen                                                                    | 27251 |                      | 62.03         | 54.93       | -1.28       | 0.013     |
| 220567_at   | IKZF2   | IKAROS family zinc finger 2 (Helios)                                            | 22807 | Hs.604950            | 37.98         | 33.98       | -1.25       | 0.013     |
| 204434_at   | SPATA2  | spermatogenesis associated 2                                                    | 9825  | Hs.48513             | 98.87         | 89.37       | -1.22       | 0.013     |
| 209995_s_at | TCL1A   | T-cell leukemia/lymphoma 1A                                                     | 8115  | Hs.2484              | 91.54         | 81.35       | -1.27       | 0.014     |
| 206192_at   | CDSN    | corneodesmosin                                                                  | 1041  | Hs.556031            | 109.17        | 94.00       | -1.35       | 0.014     |
| 205044_at   | GABRP   | gamma-aminobutyric acid (GABA) A receptor,                                      | 2568  | Hs.26225             | 34.60         | 30.83       | -1.26       | 0.014     |

| Probe       | Symbol    | Description                                                                  | Gene   | UniGene              | Av Exp Female | Av Exp Male | Fold Change | adj P val |
|-------------|-----------|------------------------------------------------------------------------------|--------|----------------------|---------------|-------------|-------------|-----------|
|             |           | pi                                                                           |        |                      |               |             |             |           |
| 207840_at   | CD160     | CD160 molecule                                                               | 11126  | Hs.488237            | 22.96         | 20.91       | -1.21       | 0.014     |
| 210131_x_at | SDHC      | succinate dehydrogenase complex, subunit C, integral membrane protein, 15kDa | 6391   | Hs.444472            | 459.14        | 543.09      | 1.40        | 0.014     |
| 202587_s_at | AK1       | adenylate kinase 1                                                           | 203    | Hs.175473            | 990.08        | 1240.57     | 1.57        | 0.014     |
| 210143_at   | ANXA10    | annexin A10                                                                  | 11199  | Hs.188401            | 28.25         | 24.87       | -1.29       | 0.014     |
| 210674_s_at | PCDHA12   | protocadherin alpha 12                                                       | 56137  | Hs.199343, Hs.608548 | 18.47         | 17.32       | -1.14       | 0.014     |
| 209046_s_at | GABARAPL2 | GABA(A) receptor-associated protein-like 2                                   | 11345  | Hs.461379            | 1464.20       | 1737.93     | 1.41        | 0.014     |
| 215105_at   | CG030     | hypothetical gene CG030                                                      | 116828 | Hs.658751            | 30.26         | 27.36       | -1.22       | 0.014     |
| 216539_at   | ATXN3L    | ataxin 3-like                                                                | 92552  | Hs.382641            | 29.38         | 26.53       | -1.23       | 0.014     |
| 215129_at   | PIK3C2G   | phosphoinositide-3-kinase, class 2, gamma polypeptide                        | 5288   | Hs.22500             | 22.93         | 20.75       | -1.22       | 0.014     |
| 207628_s_at | WBSCR22   | Williams Beuren syndrome chromosome region 22                                | 114049 | Hs.647063            | 237.60        | 281.52      | 1.40        | 0.014     |
| 207523_at   | C6orf10   | chromosome 6 open reading frame 10                                           | 10665  | Hs.567414            | 23.50         | 21.08       | -1.24       | 0.014     |
| 221034_s_at | TEX13B    | testis expressed 13B                                                         | 56156  | Hs.333130            | 75.65         | 67.30       | -1.26       | 0.014     |
| 208188_at   | KRT9      | keratin 9 (epidermolytic palmoplantar keratoderma)                           | 3857   | Hs.654569            | 82.52         | 74.42       | -1.23       | 0.014     |
| 207642_at   | HCRT      | hypocretin (orexin) neuropeptide precursor                                   | 3060   | Hs.158348            | 43.13         | 38.46       | -1.26       | 0.014     |
| 214983_at   | TTY15     | testis-specific transcript, Y-linked 15                                      | 64595  | Hs.433656            | 22.11         | 25.08       | 1.29        | 0.014     |
| 205832_at   | CPA4      | carboxypeptidase A4                                                          | 51200  | Hs.93764             | 84.35         | 74.41       | -1.28       | 0.014     |
| 217906_at   | KLHDC2    | kelch domain containing 2                                                    | 23588  | Hs.509264            | 472.46        | 571.16      | 1.46        | 0.014     |
| 211614_at   |           |                                                                              | 51581  |                      | 150.61        | 129.27      | -1.36       | 0.014     |
| 206761_at   | CD96      | CD96 molecule                                                                | 10225  | Hs.142023            | 23.34         | 21.25       | -1.21       | 0.014     |
| 209331_s_at | MAX       | MYC associated factor X                                                      | 4149   | Hs.285354            | 188.05        | 233.92      | 1.55        | 0.014     |
| 214482_at   | ZBTB25    | zinc finger and BTB domain containing 25                                     | 7597   | Hs.654571            | 58.65         | 52.90       | -1.23       | 0.015     |
| 206241_at   | KPNA5     | karyopherin alpha 5 (importin alpha 6)                                       | 3841   | Hs.182971            | 12.84         | 12.02       | -1.14       | 0.015     |
| 216242_x_at | POLR2J3   | RPB11b2 protein                                                              | 548644 | Hs.654726            | 175.62        | 219.40      | 1.56        | 0.015     |
| 221025_x_at | PUS7L     | pseudouridylyl synthase 7 homolog (S. cerevisiae)-like                       | 83448  | Hs.445814            | 133.35        | 120.16      | -1.23       | 0.015     |
| 205544_s_at | CR2       | complement component (3d/Epstein Barr virus) receptor 2                      | 1380   | Hs.445757            | 21.88         | 20.05       | -1.19       | 0.015     |

| Probe       | Symbol    | Description                                                                      | Gene  | UniGene                         | Av Exp Female | Av Exp Male | Fold Change | adj P val |
|-------------|-----------|----------------------------------------------------------------------------------|-------|---------------------------------|---------------|-------------|-------------|-----------|
| 210774_s_at | NCOA4     | nuclear receptor coactivator 4                                                   | 8031  | Hs.643658, Hs.656841            | 1086.06       | 1278.44     | 1.39        | 0.015     |
| 207712_at   | BAGE      | B melanoma antigen                                                               | 574   | Hs.545789, Hs.624542, Hs.624543 | 14.47         | 13.53       | -1.14       | 0.015     |
| 220787_at   |           |                                                                                  | 55492 |                                 | 14.66         | 13.52       | -1.18       | 0.015     |
| 202824_s_at | TCEB1     | transcription elongation factor B (SIII), polypeptide 1 (15kDa, elongin C)       | 6921  | Hs.554594                       | 250.12        | 299.60      | 1.43        | 0.015     |
| 217852_s_at | ARL8B     | ADP-ribosylation factor-like 8B                                                  | 55207 | Hs.250009                       | 378.13        | 453.92      | 1.44        | 0.015     |
| 208198_x_at | KIR2DS1   | killer cell immunoglobulin-like receptor, two domains, short cytoplasmic tail, 1 | 3806  | Hs.661101                       | 205.02        | 183.96      | -1.24       | 0.015     |
| 218168_s_at | CABC1     | chaperone, ABC1 activity of bc1 complex homolog ( <i>S. pombe</i> )              | 56997 | Hs.118241                       | 379.44        | 444.08      | 1.37        | 0.015     |
| 220869_at   |           |                                                                                  | 55368 |                                 | 29.68         | 26.39       | -1.26       | 0.015     |
| 220613_s_at | SYTL2     | synaptotagmin-like 2                                                             | 54843 | Hs.369520                       | 36.21         | 32.69       | -1.23       | 0.015     |
| 208709_s_at | NRD1      | nardilysin (N-arginine dibasic convertase)                                       | 4898  | Hs.584782                       | 461.53        | 513.01      | 1.24        | 0.015     |
| 202831_at   | GPX2      | glutathione peroxidase 2 (gastrointestinal)                                      | 2877  | Hs.2704                         | 225.09        | 198.78      | -1.28       | 0.015     |
| 218711_s_at | SDPR      | serum deprivation response (phosphatidylserine binding protein)                  | 8436  | Hs.26530                        | 107.60        | 147.13      | 1.87        | 0.015     |
| 221477_s_at | MGC5618   | hypothetical protein MGC5618                                                     | 79099 |                                 | 387.71        | 490.25      | 1.60        | 0.015     |
| 209233_at   | EMG1      | EMG1 nucleolar protein homolog ( <i>S. cerevisiae</i> )                          | 10436 | Hs.558447                       | 228.64        | 259.01      | 1.28        | 0.015     |
| 207065_at   | KRT75     | keratin 75                                                                       | 9119  | Hs.661062                       | 83.44         | 72.68       | -1.32       | 0.015     |
| 220384_at   | TXNDC3    | thioredoxin domain containing 3 (spermatzoa)                                     | 51314 | Hs.134079                       | 24.36         | 21.86       | -1.24       | 0.015     |
| 219964_at   | ST7L      | suppression of tumorigenicity 7 like                                             | 54879 | Hs.201921                       | 75.47         | 68.20       | -1.22       | 0.015     |
| 208678_at   | ATP6V1E1  | ATPase, H+ transporting, lysosomal 31kDa, V1 subunit E1                          | 529   | Hs.517338                       | 764.60        | 864.95      | 1.28        | 0.015     |
| 221779_at   | MICALL1   | MICAL-like 1                                                                     | 85377 | Hs.517610                       | 122.71        | 110.95      | -1.22       | 0.015     |
| 217993_s_at | MAT2B     | methionine adenosyltransferase II, beta                                          | 27430 | Hs.54642                        | 559.56        | 672.98      | 1.45        | 0.015     |
| 213837_at   | C20orf194 | chromosome 20 open reading frame 194                                             | 25943 | Hs.516853                       | 110.17        | 99.19       | -1.23       | 0.015     |
| 219071_x_at | C8orf30A  | chromosome 8 open reading frame 30A                                              | 51236 | Hs.300224                       | 247.69        | 221.14      | -1.25       | 0.015     |

| Probe       | Symbol   | Description                                                           | Gene  | UniGene   | Av Exp Female | Av Exp Male | Fold Change | adj P val |
|-------------|----------|-----------------------------------------------------------------------|-------|-----------|---------------|-------------|-------------|-----------|
| 206797_at   | NAT2     | N-acetyltransferase 2 (arylamine N-acetyltransferase)                 | 10    | Hs.2      | 93.63         | 81.67       | -1.31       | 0.015     |
| 210413_x_at | SERPINB4 | serpin peptidase inhibitor, clade B (ovalbumin), member 4             | 6318  | Hs.123035 | 58.25         | 51.04       | -1.30       | 0.015     |
| 202296_s_at | RER1     | RER1 retention in endoplasmic reticulum 1 homolog (S. cerevisiae)     | 11079 | Hs.525527 | 259.25        | 304.98      | 1.38        | 0.015     |
| 206510_at   | SIX2     | SIX homeobox 2                                                        | 10736 | Hs.101937 | 43.90         | 40.10       | -1.20       | 0.015     |
| 207599_at   | MMP20    | matrix metalloproteinase 20 (enamelysin)                              | 9313  | Hs.591946 | 21.93         | 19.86       | -1.22       | 0.015     |
| 210395_x_at | MYL4     | myosin, light chain 4, alkali; atrial, embryonic                      | 4635  | Hs.463300 | 388.33        | 616.54      | 2.52        | 0.015     |
| 206936_x_at |          |                                                                       | 58479 |           | 59.00         | 51.00       | -1.34       | 0.015     |
| 205479_s_at | PLAU     | plasminogen activator, urokinase                                      | 5328  | Hs.77274  | 141.13        | 168.04      | 1.42        | 0.015     |
| 201554_x_at | GYG1     | glycogenin 1                                                          | 2992  | Hs.477892 | 809.58        | 980.62      | 1.47        | 0.015     |
| 221675_s_at | CHPT1    | choline phosphotransferase 1                                          | 56994 | Hs.293077 | 457.91        | 541.14      | 1.40        | 0.015     |
| 207915_at   | MYCL2    | v-myc myelocytomatosis viral oncogene homolog 2 (avian)               | 4611  |           | 47.78         | 40.26       | -1.41       | 0.015     |
| 208680_at   | PRDX1    | peroxiredoxin 1                                                       | 5052  | Hs.180909 | 690.71        | 804.70      | 1.36        | 0.015     |
| 205342_s_at | SULT1C2  | sulfotransferase family, cytosolic, 1C, member 2                      | 6819  | Hs.436123 | 39.43         | 35.44       | -1.24       | 0.015     |
| 206486_at   | LAG3     | lymphocyte-activation gene 3                                          | 3902  | Hs.409523 | 29.38         | 25.75       | -1.30       | 0.015     |
| 214859_at   | FSTL4    | follistatin-like 4                                                    | 23105 | Hs.483390 | 50.45         | 46.43       | -1.18       | 0.015     |
| 208543_at   | OR10H2   | olfactory receptor, family 10, subfamily H, member 2                  | 26538 | Hs.247694 | 27.76         | 25.67       | -1.17       | 0.015     |
| 220679_s_at | CDH7     | cadherin 7, type 2                                                    | 1005  | Hs.657522 | 63.05         | 55.93       | -1.27       | 0.015     |
| 207648_at   | DRP2     | dystrophin related protein 2                                          | 1821  | Hs.159291 | 146.44        | 129.15      | -1.29       | 0.015     |
| 208425_s_at | TANC2    | tetratricopeptide repeat, ankyrin repeat and coiled-coil containing 2 | 26115 | Hs.410889 | 54.21         | 49.10       | -1.22       | 0.015     |
| 206979_at   | C8B      | complement component 8, beta polypeptide                              | 732   | Hs.391835 | 167.10        | 148.81      | -1.26       | 0.015     |
| 200794_x_at | DAZAP2   | DAZ associated protein 2                                              | 9802  | Hs.369761 | 945.06        | 1107.38     | 1.37        | 0.015     |
| 207267_s_at | DSCR6    | Down syndrome critical region gene 6                                  | 53820 | Hs.254560 | 25.01         | 23.15       | -1.17       | 0.015     |
| 221602_s_at | FAIM3    | Fas apoptotic inhibitory molecule 3                                   | 9214  | Hs.58831  | 112.97        | 97.62       | -1.34       | 0.015     |

| Probe       | Symbol   | Description                                                                                                                   | Gene   | UniGene                         | Av Exp Female | Av Exp Male | Fold Change | adj P val |
|-------------|----------|-------------------------------------------------------------------------------------------------------------------------------|--------|---------------------------------|---------------|-------------|-------------|-----------|
| 215548_s_at | SCFD1    | sec1 family domain containing 1                                                                                               | 23256  | Hs.369168                       | 110.08        | 129.04      | 1.37        | 0.015     |
| 220530_at   | PRO2266  | hypothetical protein PRO2266                                                                                                  | 55389  | Hs.662132                       | 15.16         | 14.08       | -1.16       | 0.015     |
| 219265_at   | MOBKL2B  | MOB1, Mps One Binder kinase activator-like 2B (yeast)                                                                         | 79817  | Hs.690014, Hs.694807            | 146.87        | 130.95      | -1.26       | 0.015     |
| 206988_at   | CCL25    | chemokine (C-C motif) ligand 25                                                                                               | 6370   | Hs.310511                       | 84.03         | 71.82       | -1.37       | 0.015     |
| 206835_at   | STATH    | statherin                                                                                                                     | 6779   | Hs.654495                       | 31.96         | 28.09       | -1.29       | 0.015     |
| 206990_at   | TNR      | tenascin R (restrictin, janusin)                                                                                              | 7143   | Hs.659864                       | 61.26         | 53.96       | -1.29       | 0.015     |
| 216149_at   | LRRC37B2 | leucine rich repeat containing 37, member B2                                                                                  | 147172 | Hs.568209                       | 33.24         | 29.95       | -1.23       | 0.015     |
| 220646_s_at | KLRF1    | killer cell lectin-like receptor subfamily F, member 1                                                                        | 51348  | Hs.183125                       | 12.94         | 12.01       | -1.16       | 0.015     |
| 206225_at   | ZNF507   | zinc finger protein 507                                                                                                       | 22847  | Hs.205392                       | 59.35         | 51.13       | -1.35       | 0.016     |
| 206838_at   | TBX19    | T-box 19                                                                                                                      | 9095   | Hs.645440                       | 66.51         | 60.23       | -1.22       | 0.016     |
| 207509_s_at | LAIR2    | leukocyte-associated immunoglobulin-like receptor 2                                                                           | 3904   | Hs.43803                        | 69.49         | 59.36       | -1.37       | 0.016     |
| 207706_at   | USH2A    | Usher syndrome 2A (autosomal recessive, mild)                                                                                 | 7399   | Hs.655974                       | 17.57         | 16.36       | -1.15       | 0.016     |
| 220737_at   | RPS6KA6  | ribosomal protein S6 kinase, 90kDa, polypeptide 6                                                                             | 27330  | Hs.368153                       | 96.06         | 83.07       | -1.34       | 0.016     |
| 209445_x_at | C7orf44  | chromosome 7 open reading frame 44                                                                                            | 55744  | Hs.654779, Hs.655165, Hs.658441 | 290.18        | 328.42      | 1.28        | 0.016     |
| 220100_at   | SLC22A11 | solute carrier family 22 (organic anion/cation transporter), member 11                                                        | 55867  | Hs.220844                       | 48.20         | 42.75       | -1.27       | 0.016     |
| 207333_at   | NMBR     | neuromedin B receptor                                                                                                         | 4829   | Hs.654478                       | 23.68         | 21.14       | -1.25       | 0.016     |
| 220880_at   |          |                                                                                                                               | 55465  |                                 | 17.16         | 16.05       | -1.14       | 0.016     |
| 204305_at   | MIPEP    | mitochondrial intermediate peptidase                                                                                          | 4285   | Hs.507498                       | 137.29        | 156.26      | 1.30        | 0.016     |
| 32032_at    | DGCR14   | DiGeorge syndrome critical region gene 14                                                                                     | 8220   | Hs.517407, Hs.686112            | 117.32        | 108.54      | -1.17       | 0.016     |
| 210039_s_at | PRKCO    | protein kinase C, theta                                                                                                       | 5588   | Hs.498570                       | 143.18        | 128.07      | -1.25       | 0.016     |
| 208643_s_at | XRCC5    | X-ray repair complementing defective repair in Chinese hamster cells 5 (double-strand-break rejoining; Ku autoantigen, 80kDa) | 7520   | Hs.388739                       | 370.14        | 437.17      | 1.40        | 0.016     |

| Probe       | Symbol       | Description                                                              | Gene   | UniGene                               | Av Exp Female | Av Exp Male | Fold Change | adj P val |
|-------------|--------------|--------------------------------------------------------------------------|--------|---------------------------------------|---------------|-------------|-------------|-----------|
| 208597_at   | CNTF         | ciliary neurotrophic factor                                              | 1270   | Hs.632114                             | 44.66         | 40.12       | -1.24       | 0.016     |
| 206210_s_at | CETP         | cholesteryl ester transfer protein, plasma                               | 1071   | Hs.89538                              | 57.49         | 50.59       | -1.29       | 0.016     |
| 218785_s_at | RABL5        | RAB, member RAS oncogene family-like 5                                   | 64792  | Hs.389104                             | 44.05         | 39.59       | -1.24       | 0.016     |
| 207362_at   | SLC30A4      | solute carrier family 30 (zinc transporter), member 4                    | 7782   | Hs.162989                             | 16.94         | 15.57       | -1.18       | 0.016     |
| 204920_at   | CPS1         | carbamoyl-phosphate synthetase 1, mitochondrial                          | 1373   | Hs.149252                             | 71.70         | 64.57       | -1.23       | 0.016     |
| 215011_at   | SNHG3        | small nucleolar RNA host gene (non-protein coding) 3                     | 8420   | Hs.469723                             | 27.21         | 24.92       | -1.19       | 0.016     |
| 202673_at   | DPM1         | dolichyl-phosphate mannosyltransferase polypeptide 1, catalytic subunit  | 8813   | Hs.654951                             | 192.40        | 237.34      | 1.52        | 0.016     |
| 215223_s_at | SOD2         | superoxide dismutase 2, mitochondrial                                    | 6648   | Hs.487046                             | 157.11        | 201.25      | 1.64        | 0.016     |
| 208375_at   | IFNA1        | interferon, alpha 1                                                      | 3439   | Hs.37026                              | 19.31         | 17.93       | -1.16       | 0.016     |
| 206998_x_at | PRB3         | proline-rich protein BstNI subfamily 3                                   | 5544   | Hs.73031                              | 54.59         | 48.82       | -1.25       | 0.016     |
| 213118_at   | KIAA0701     | KIAA0701 protein                                                         | 23074  | Hs.620701                             | 27.57         | 31.77       | 1.33        | 0.016     |
| 204272_at   | LGALS4       | lectin, galactoside-binding, soluble, 4 (galectin 4)                     | 3960   | Hs.5302                               | 40.74         | 36.44       | -1.25       | 0.016     |
| 200594_x_at | HNRNPU       | heterogeneous nuclear ribonucleoprotein U (scaffold attachment factor A) | 3192   | Hs.166463                             | 594.41        | 737.75      | 1.54        | 0.016     |
| 217273_at   | PRAMEF10     | PRAME family member 10                                                   | 343071 | Hs.684629                             | 70.26         | 61.76       | -1.29       | 0.016     |
| 218194_at   | REXO2        | REX2, RNA exonuclease 2 homolog (S. cerevisiae)                          | 25996  | Hs.7527,<br>Hs.677190                 | 1262.65       | 1466.38     | 1.35        | 0.016     |
| 205184_at   | GNG4         | guanine nucleotide binding protein (G protein), gamma 4                  | 2786   | Hs.159711,<br>Hs.591531,<br>Hs.658122 | 139.28        | 122.82      | -1.29       | 0.016     |
| 215349_at   | hCG_173047_4 | hCG1730474                                                               | 643376 | Hs.652246                             | 47.81         | 42.62       | -1.26       | 0.016     |
| 219657_s_at | KLF3         | Kruppel-like factor 3 (basic)                                            | 51274  | Hs.298658                             | 133.27        | 118.44      | -1.27       | 0.016     |
| 220589_s_at | ITFG2        | integrin alpha FG-GAP repeat containing 2                                | 55846  | Hs.446098,<br>Hs.448720               | 34.85         | 39.63       | 1.29        | 0.016     |
| 207452_s_at | CNTN5        | contactin 5                                                              | 53942  | Hs.656783                             | 15.71         | 14.67       | -1.15       | 0.016     |
| 204124_at   | SLC34A2      | solute carrier family 34 (sodium phosphate), member 2                    | 10568  | Hs.479372                             | 21.93         | 20.31       | -1.17       | 0.016     |
| 219429_at   | FA2H         | fatty acid 2-hydroxylase                                                 | 79152  | Hs.461329                             | 23.42         | 21.67       | -1.17       | 0.016     |

| Probe       | Symbol    | Description                                                                                                                                                                                  | Gene   | UniGene   | Av Exp<br>Female | Av Exp<br>Male | Fold<br>Change | adj P val |
|-------------|-----------|----------------------------------------------------------------------------------------------------------------------------------------------------------------------------------------------|--------|-----------|------------------|----------------|----------------|-----------|
| 206672_at   | AQP2      | aquaporin 2 (collecting duct)                                                                                                                                                                | 359    | Hs.130730 | 199.85           | 183.63         | -1.18          | 0.016     |
| 208344_x_at | IFNA13    | interferon, alpha 13                                                                                                                                                                         | 3447   | Hs.533471 | 193.33           | 170.22         | -1.29          | 0.016     |
| 202941_at   | NDUFV2    | NADH dehydrogenase (ubiquinone) flavoprotein 2, 24kDa                                                                                                                                        | 4729   | Hs.464572 | 1185.01          | 1427.50        | 1.45           | 0.016     |
| 208521_at   | OR511     | olfactory receptor, family 5, subfamily I, member 1                                                                                                                                          | 10798  | Hs.533706 | 61.61            | 52.52          | -1.38          | 0.017     |
| 219454_at   | EGFL6     | EGF-like-domain, multiple 6                                                                                                                                                                  | 25975  | Hs.12844  | 22.52            | 20.48          | -1.21          | 0.017     |
| 204602_at   | DKK1      | dickkopf homolog 1 (Xenopus laevis)                                                                                                                                                          | 22943  | Hs.40499  | 35.46            | 31.60          | -1.26          | 0.017     |
| 206079_at   | CHML      | choroideremia-like (Rab escort protein 2)                                                                                                                                                    | 1122   | Hs.654545 | 18.52            | 16.97          | -1.19          | 0.017     |
| 220085_at   | HELLS     | helicase, lymphoid-specific                                                                                                                                                                  | 3070   | Hs.655830 | 21.18            | 19.47          | -1.18          | 0.017     |
| 208210_at   | MAS1      | MAS1 oncogene                                                                                                                                                                                | 4142   | Hs.99900  | 89.98            | 77.81          | -1.34          | 0.017     |
| 208263_at   |           |                                                                                                                                                                                              | 55447  |           | 17.99            | 16.57          | -1.18          | 0.017     |
| 208234_x_at | FGFR2     | fibroblast growth factor receptor 2 (bacteria-expressed kinase, keratinocyte growth factor receptor, craniofacial dysostosis 1, Crouzon syndrome, Pfeiffer syndrome, Jackson-Weiss syndrome) | 2263   | Hs.533683 | 109.32           | 95.27          | -1.32          | 0.017     |
| 210302_s_at | MAB21L2   | mab-21-like 2 (C. elegans)                                                                                                                                                                   | 10586  | Hs.584852 | 23.10            | 21.09          | -1.20          | 0.017     |
| 208191_x_at | PSG4      | pregnancy specific beta-1-glycoprotein 4                                                                                                                                                     | 5672   | Hs.654468 | 120.57           | 107.58         | -1.26          | 0.017     |
| 217874_at   | SUCLG1    | succinate-CoA ligase, GDP-forming, alpha subunit                                                                                                                                             | 8802   | Hs.270428 | 1364.35          | 1551.32        | 1.29           | 0.017     |
| 216469_at   | LOC727867 | similar to zinc finger protein 43 (HTF6)                                                                                                                                                     | 727867 |           | 14.57            | 13.47          | -1.17          | 0.017     |
| 212301_at   | RTF1      | Rtf1, Paf1/RNA polymerase II complex component, homolog (S. cerevisiae)                                                                                                                      | 23168  | Hs.511096 | 113.59           | 134.25         | 1.40           | 0.017     |
| 216169_at   |           |                                                                                                                                                                                              | 84169  |           | 17.31            | 15.74          | -1.21          | 0.017     |
| 220413_at   | SLC39A2   | solute carrier family 39 (zinc transporter), member 2                                                                                                                                        | 29986  | Hs.175783 | 152.59           | 139.35         | -1.20          | 0.017     |
| 218341_at   | PPCS      | phosphopantothenoylcy steine synthetase                                                                                                                                                      | 79717  | Hs.473495 | 161.84           | 182.76         | 1.28           | 0.017     |
| 208134_x_at | PSG2      | pregnancy specific beta-1-glycoprotein 2                                                                                                                                                     | 5670   | Hs.654453 | 33.11            | 29.55          | -1.26          | 0.017     |
| 222244_s_at | TUG1      | taurine upregulated                                                                                                                                                                          | 55000  | Hs.554829 | 479.01           | 572.63         | 1.43           | 0.017     |



| Probe       | Symbol  | Description                                                        | Gene   | UniGene              | Av Exp Female | Av Exp Male | Fold Change | adj P val |
|-------------|---------|--------------------------------------------------------------------|--------|----------------------|---------------|-------------|-------------|-----------|
|             |         | gene 1                                                             |        |                      |               |             |             |           |
| 202926_at   | NAG     | neuroblastoma-amplified protein                                    | 51594  | Hs.467759            | 148.16        | 166.25      | 1.26        | 0.017     |
| 222106_at   | PRND    | prion protein 2 (dublet)                                           | 23627  | Hs.406696            | 19.16         | 17.75       | -1.16       | 0.017     |
| 207716_at   | KRT38   | keratin 38                                                         | 8687   | Hs.248188            | 58.48         | 52.74       | -1.23       | 0.017     |
| 220115_s_at | CDH10   | cadherin 10, type 2 (T2-cadherin)                                  | 1008   | Hs.92489             | 35.24         | 32.54       | -1.17       | 0.017     |
| 219502_at   | NEIL3   | nei endonuclease VIII-like 3 (E. coli)                             | 55247  | Hs.405467            | 25.68         | 23.63       | -1.18       | 0.017     |
| 215532_x_at | ZNF492  | zinc finger protein 492                                            | 57615  | Hs.232108            | 11.71         | 11.00       | -1.13       | 0.017     |
| 206651_s_at | CPB2    | carboxypeptidase B2 (plasma)                                       | 1361   | Hs.512937            | 20.41         | 18.44       | -1.22       | 0.017     |
| 215174_at   | FMO6P   | flavin containing monooxygenase 6 pseudogene                       | 388714 | Hs.448988            | 48.66         | 44.59       | -1.19       | 0.017     |
| 219877_at   | ZMAT4   | zinc finger, matrin type 4                                         | 79698  | Hs.591850            | 92.82         | 82.69       | -1.26       | 0.017     |
| 207183_at   | GPR19   | G protein-coupled receptor 19                                      | 2842   | Hs.657862            | 76.91         | 66.78       | -1.33       | 0.017     |
| 209915_s_at | NRXN1   | neurexin 1                                                         | 9378   | Hs.637685            | 82.98         | 73.61       | -1.27       | 0.017     |
| 201705_at   | PSMD7   | proteasome (prosome, macropain) 26S subunit, non-ATPase, 7         | 5713   | Hs.440604            | 373.53        | 426.51      | 1.30        | 0.017     |
| 200682_s_at | UBE2L3  | ubiquitin-conjugating enzyme E2L 3                                 | 7332   | Hs.108104, Hs.693707 | 359.55        | 409.37      | 1.30        | 0.017     |
| 206639_x_at | HTN1    | histatin 1                                                         | 3346   | Hs.250959            | 20.49         | 18.91       | -1.17       | 0.017     |
| 205798_at   | IL7R    | interleukin 7 receptor                                             | 3575   | Hs.591742, Hs.693675 | 61.75         | 47.77       | -1.67       | 0.017     |
| 207061_at   | ERN1    | endoplasmic reticulum to nucleus signaling 1                       | 2081   | Hs.133982            | 98.28         | 90.43       | -1.18       | 0.017     |
| 221908_at   | TMEM118 | transmembrane protein 118                                          | 84900  | Hs.437195            | 45.75         | 41.37       | -1.22       | 0.017     |
| 207800_at   | AKAP5   | A kinase (PRKA) anchor protein 5                                   | 9495   | Hs.532489            | 36.45         | 33.15       | -1.21       | 0.017     |
| 202300_at   | HBXIP   | hepatitis B virus x interacting protein                            | 10542  | Hs.439815            | 691.22        | 808.20      | 1.37        | 0.017     |
| 213847_at   | PRPH    | peripherin                                                         | 5630   | Hs.37044             | 146.57        | 128.95      | -1.29       | 0.017     |
| 221688_s_at | IMP3    | IMP3, U3 small nucleolar ribonucleoprotein, homolog (yeast)        | 55272  | Hs.513043            | 119.01        | 134.74      | 1.28        | 0.017     |
| 207325_x_at | MAGEA1  | melanoma antigen family A, 1 (directs expression of antigen MZ2-E) | 4100   | Hs.72879             | 18.34         | 16.89       | -1.18       | 0.017     |
| 217927_at   | SPCS1   | signal peptidase complex subunit 1 homolog (S. cerevisiae)         | 28972  | Hs.11125, Hs.297304  | 543.93        | 645.89      | 1.41        | 0.017     |
| 221717_at   |         |                                                                    | 84098  |                      | 104.58        | 94.98       | -1.21       | 0.017     |
| 203538_at   | CAMLG   | calcium modulating                                                 | 819    | Hs.529846            | 137.66        | 160.67      | 1.36        | 0.017     |

| Probe       | Symbol   | Description                                                                             | Gene   | UniGene              | Av Exp Female | Av Exp Male | Fold Change | adj P val |
|-------------|----------|-----------------------------------------------------------------------------------------|--------|----------------------|---------------|-------------|-------------|-----------|
|             |          | ligand                                                                                  |        |                      |               |             |             |           |
| 200007_at   | SRP14    | signal recognition particle 14kDa (homologous Alu RNA binding protein)                  | 6727   | Hs.533732            | 1513.64       | 1680.58     | 1.23        | 0.017     |
| 203475_at   | CYP19A1  | cytochrome P450, family 19, subfamily A, polypeptide 1                                  | 1588   | Hs.654384            | 37.90         | 34.00       | -1.24       | 0.017     |
| 209627_s_at | OSBPL3   | oxysterol binding protein-like 3                                                        | 26031  | Hs.520259            | 54.38         | 48.51       | -1.26       | 0.017     |
| 217932_at   | MRPS7    | mitochondrial ribosomal protein S7                                                      | 51081  | Hs.71787             | 422.39        | 501.03      | 1.41        | 0.017     |
| 208158_s_at | OSBPL1A  | oxysterol binding protein-like 1A                                                       | 114876 | Hs.370725            | 227.83        | 258.43      | 1.29        | 0.017     |
| 204952_at   | LYPD3    | LY6/PLAUR domain containing 3                                                           | 27076  | Hs.631594            | 193.55        | 172.90      | -1.25       | 0.017     |
| 220722_s_at | SLC5A7   | solute carrier family 5 (choline transporter), member 7                                 | 60482  | Hs.287758            | 52.84         | 47.61       | -1.23       | 0.017     |
| 207878_at   | KRT76    | keratin 76                                                                              | 51350  | Hs.654392            | 73.42         | 63.73       | -1.33       | 0.017     |
| 206035_at   | REL      | v-rel reticuloendotheliosis viral oncogene homolog (avian)                              | 5966   | Hs.631886            | 35.06         | 31.34       | -1.25       | 0.017     |
| 201199_s_at | PSMD1    | proteasome (prosome, macropain) 26S subunit, non-ATPase, 1                              | 5707   | Hs.3887              | 473.65        | 528.78      | 1.25        | 0.017     |
| 200606_at   | DSP      | desmoplakin                                                                             | 1832   | Hs.519873            | 1112.68       | 1333.76     | 1.44        | 0.017     |
| 212119_at   | RHOQ     | ras homolog gene family, member Q                                                       | 23433  | Hs.693587            | 1185.89       | 1485.11     | 1.57        | 0.017     |
| 208035_at   | GRM6     | glutamate receptor, metabotropic 6                                                      | 2916   | Hs.248131            | 56.24         | 50.04       | -1.26       | 0.017     |
| 204197_s_at | RUNX3    | runt-related transcription factor 3                                                     | 864    | Hs.170019            | 56.49         | 47.90       | -1.39       | 0.017     |
| 209571_at   | CIR      | CBF1 interacting corepressor                                                            | 9541   | Hs.632531            | 46.87         | 52.72       | 1.27        | 0.017     |
| 213587_s_at | ATP6V0E2 | ATPase, H+ transporting V0 subunit e2                                                   | 155066 | Hs.556998, Hs.694765 | 335.66        | 422.62      | 1.59        | 0.017     |
| 210393_at   | LGR5     | leucine-rich repeat-containing G protein-coupled receptor 5                             | 8549   | Hs.658889            | 65.72         | 59.21       | -1.23       | 0.017     |
| 219412_at   | RAB38    | RAB38, member RAS oncogene family                                                       | 23682  | Hs.591975            | 24.33         | 22.07       | -1.22       | 0.017     |
| 205886_at   | REG1B    | regenerating islet-derived 1 beta (pancreatic stone protein, pancreatic thread protein) | 5968   | Hs.4158              | 48.52         | 43.31       | -1.26       | 0.017     |
| 205012_s_at | HAGH     | hydroxyacylglutathione hydrolase                                                        | 3029   | Hs.157394, Hs.513265 | 272.53        | 307.54      | 1.27        | 0.017     |

| Probe       | Symbol    | Description                                      | Gene   | UniGene                               | Av Exp Female | Av Exp Male | Fold Change | adj P val |
|-------------|-----------|--------------------------------------------------|--------|---------------------------------------|---------------|-------------|-------------|-----------|
| 201266_at   | TXNRD1    | thioredoxin reductase 1                          | 7296   | Hs.654922                             | 267.64        | 334.19      | 1.56        | 0.017     |
| 204398_s_at | EML2      | echinoderm microtubule associated protein like 2 | 24139  | Hs.24178                              | 139.27        | 159.11      | 1.31        | 0.017     |
| 204033_at   | TRIP13    | thyroid hormone receptor interactor 13           | 9319   | Hs.436187                             | 72.99         | 65.42       | -1.25       | 0.017     |
| 202777_at   | SHOC2     | soc-2 suppressor of clear homolog (C. elegans)   | 8036   | Hs.104315                             | 132.32        | 163.25      | 1.52        | 0.017     |
| 214838_at   | SFT2D2    | SFT2 domain containing 2                         | 375035 | Hs.645435                             | 122.93        | 108.38      | -1.29       | 0.017     |
| 211703_s_at | TM2D1     | TM2 domain containing 1                          | 83941  | Hs.656790                             | 108.00        | 131.86      | 1.49        | 0.017     |
| 219329_s_at | C2orf28   | chromosome 2 open reading frame 28               | 51374  | Hs.9527                               | 667.27        | 766.51      | 1.32        | 0.017     |
| 220246_at   | CAMK1D    | calcium/calmodulin-dependent protein kinase ID   | 57118  | Hs.659517                             | 38.64         | 34.56       | -1.25       | 0.017     |
| 214365_at   | TPM3      | tropomyosin 3                                    | 7170   | Hs.535581,<br>Hs.644306,<br>Hs.654421 | 239.43        | 373.63      | 2.44        | 0.017     |
| 201472_at   | VBP1      | von Hippel-Lindau binding protein 1              | 7411   | Hs.436803                             | 446.42        | 549.01      | 1.51        | 0.017     |
| 221453_at   | G6PC2     | glucose-6-phosphatase, catalytic, 2              | 57818  | Hs.283963                             | 71.69         | 64.22       | -1.25       | 0.017     |
| 202022_at   | ALDOC     | aldolase C, fructose-bisphosphate                | 230    | Hs.155247                             | 621.75        | 740.42      | 1.42        | 0.017     |
| 213925_at   | C1orf95   | chromosome 1 open reading frame 95               | 375057 | Hs.116827,<br>Hs.592751               | 94.78         | 82.11       | -1.33       | 0.017     |
| 218386_x_at | USP16     | ubiquitin specific peptidase 16                  | 10600  | Hs.99819                              | 188.23        | 233.14      | 1.53        | 0.018     |
| 208749_x_at | FLOT1     | flotillin 1                                      | 10211  | Hs.179986                             | 994.69        | 1097.99     | 1.22        | 0.018     |
| 220059_at   | STAP1     | signal transducing adaptor family member 1       | 26228  | Hs.435579                             | 23.97         | 21.82       | -1.21       | 0.018     |
| 219916_s_at | RNF39     | ring finger protein 39                           | 80352  | Hs.121178                             | 134.82        | 118.61      | -1.29       | 0.018     |
| 220603_s_at | MCTP2     | multiple C2 domains, transmembrane 2             | 55784  | Hs.592017                             | 37.54         | 33.85       | -1.23       | 0.018     |
| 202488_s_at | FXYP3     | FXYP domain containing ion transport regulator 3 | 5349   | Hs.301350                             | 230.03        | 205.64      | -1.25       | 0.018     |
| 208468_at   | SOX21     | SRY (sex determining region Y)-box 21            | 11166  | Hs.187577                             | 67.45         | 58.66       | -1.32       | 0.018     |
| 220620_at   | CRCT1     | cysteine-rich C-terminal 1                       | 54544  | Hs.110196                             | 21.10         | 19.04       | -1.23       | 0.018     |
| 206520_x_at | SIGLEC6   | sialic acid binding Ig-like lectin 6             | 946    | Hs.397255                             | 104.30        | 94.62       | -1.22       | 0.018     |
| 217768_at   | C14orf166 | chromosome 14 open reading frame 166             | 51637  | Hs.534457                             | 796.50        | 924.44      | 1.35        | 0.018     |
| 210864_x_at | HFE       | hemochromatosis                                  | 3077   | Hs.233325                             | 213.44        | 189.07      | -1.27       | 0.018     |

| Probe       | Symbol  | Description                                                                      | Gene  | UniGene                 | Av Exp<br>Female | Av Exp<br>Male | Fold<br>Change | adj P val |
|-------------|---------|----------------------------------------------------------------------------------|-------|-------------------------|------------------|----------------|----------------|-----------|
| 207209_at   | CETN1   | centrin, EF-hand protein, 1                                                      | 1068  | Hs.122511               | 111.26           | 100.82         | -1.22          | 0.018     |
| 203661_s_at | TMOD1   | tropomodulin 1                                                                   | 7111  | Hs.494595               | 662.37           | 770.57         | 1.35           | 0.018     |
| 202472_at   | MPI     | mannose phosphate isomerase                                                      | 4351  | Hs.75694                | 123.59           | 137.48         | 1.24           | 0.018     |
| 206617_s_at | RENBP   | renin binding protein                                                            | 5973  | Hs.158331               | 81.51            | 73.51          | -1.23          | 0.018     |
| 218866_s_at | POLR3K  | polymerase (RNA) III (DNA directed) polypeptide K, 12.3 kDa                      | 51728 | Hs.632223               | 81.61            | 91.04          | 1.24           | 0.018     |
| 207060_at   | EN2     | engrailed homeobox 2                                                             | 2020  | Hs.134989               | 42.39            | 38.54          | -1.21          | 0.018     |
| 215638_at   | ERBB3   | v-erb-b2 erythroblastic leukemia viral oncogene homolog 3 (avian)                | 2065  | Hs.118681               | 47.98            | 42.83          | -1.26          | 0.018     |
| 211532_x_at | KIR2DS2 | killer cell immunoglobulin-like receptor, two domains, short cytoplasmic tail, 2 | 3807  | Hs.512572,<br>Hs.654605 | 52.74            | 46.89          | -1.27          | 0.018     |
| 210712_at   | LDHAL6B | lactate dehydrogenase A-like 6B                                                  | 92483 | Hs.307052               | 19.22            | 17.02          | -1.28          | 0.018     |
| 208742_s_at | SAP18   | Sin3A-associated protein, 18kDa                                                  | 10284 | Hs.524899               | 826.35           | 982.87         | 1.41           | 0.018     |
| 217147_s_at | TRAT1   | T cell receptor associated transmembrane adaptor 1                               | 50852 | Hs.138701               | 16.60            | 15.32          | -1.17          | 0.018     |
| 220496_at   | CLEC1B  | C-type lectin domain family 1, member B                                          | 51266 | Hs.409794               | 34.41            | 31.67          | -1.18          | 0.018     |
| 206985_at   | HSD17B3 | hydroxysteroid (17-beta) dehydrogenase 3                                         | 3293  | Hs.477                  | 100.82           | 91.43          | -1.22          | 0.018     |
| 208578_at   | SCN10A  | sodium channel, voltage-gated, type X, alpha subunit                             | 6336  | Hs.250443               | 152.95           | 132.59         | -1.33          | 0.018     |
| 203768_s_at | STS     | steroid sulfatase (microsomal), isozyme S                                        | 412   | Hs.522578               | 106.75           | 95.42          | -1.25          | 0.018     |
| 216881_x_at | PRB4    | proline-rich protein BstNI subfamily 4                                           | 5545  | Hs.528651               | 114.61           | 102.54         | -1.25          | 0.018     |
| 205884_at   | ITGA4   | integrin, alpha 4 (antigen CD49D, alpha 4 subunit of VLA-4 receptor)             | 3676  | Hs.694732               | 16.41            | 14.47          | -1.29          | 0.018     |
| 219181_at   | LIPG    | lipase, endothelial                                                              | 9388  | Hs.465102               | 31.21            | 28.63          | -1.19          | 0.018     |
| 204691_x_at | PLA2G6  | phospholipase A2, group VI (cytosolic, calcium-independent)                      | 8398  | Hs.170479               | 191.18           | 174.67         | -1.20          | 0.018     |
| 206872_at   | SLC17A1 | solute carrier family 17 (sodium phosphate), member 1                            | 6568  | Hs.205816               | 80.05            | 71.03          | -1.27          | 0.018     |
| 204133_at   | RRP9    | RRP9, small subunit (SSU) processome                                             | 9136  | Hs.153768               | 103.77           | 118.34         | 1.30           | 0.018     |

| Probe       | Symbol    | Description                                                                                          | Gene   | UniGene                        | Av Exp Female | Av Exp Male | Fold Change | adj P val |
|-------------|-----------|------------------------------------------------------------------------------------------------------|--------|--------------------------------|---------------|-------------|-------------|-----------|
|             |           | component, homolog (yeast)                                                                           |        |                                |               |             |             |           |
| 207940_x_at | CNR1      | cannabinoid receptor 1 (brain)                                                                       | 1268   | Hs.75110, Hs.690472            | 53.31         | 47.90       | -1.24       | 0.018     |
| 217877_s_at | GPBP1L1   | GC-rich promoter binding protein 1-like 1                                                            | 60313  | Hs.238432                      | 274.67        | 308.14      | 1.26        | 0.018     |
| 220375_s_at |           |                                                                                                      | 79808  |                                | 118.07        | 107.46      | -1.21       | 0.018     |
| 213680_at   | KRT6C     | keratin 6C                                                                                           | 286887 | Hs.654613                      | 49.50         | 44.59       | -1.23       | 0.018     |
| 201658_at   | ARL1      | ADP-ribosylation factor-like 1                                                                       | 400    | Hs.372616                      | 163.61        | 193.01      | 1.39        | 0.018     |
| 215788_at   | LOC339457 | hypothetical protein LOC339457                                                                       | 339457 | Hs.259619                      | 179.35        | 160.71      | -1.25       | 0.018     |
| 211195_s_at | TP63      | tumor protein p63                                                                                    | 8626   | Hs.137569                      | 101.67        | 86.89       | -1.37       | 0.018     |
| 203390_s_at | KIF3C     | kinesin family member 3C                                                                             | 3797   | Hs.21611                       | 78.24         | 70.47       | -1.23       | 0.018     |
| 206412_at   | FER       | fer (fps/fes related) tyrosine kinase (phosphoprotein NCP94)                                         | 2241   | Hs.221472                      | 58.22         | 53.99       | -1.16       | 0.018     |
| 218285_s_at | BDH2      | 3-hydroxybutyrate dehydrogenase, type 2                                                              | 56898  | Hs.124696                      | 128.66        | 152.73      | 1.41        | 0.018     |
| 209455_at   | FBXW11    | F-box and WD repeat domain containing 11                                                             | 23291  | Hs.484138                      | 210.96        | 248.15      | 1.38        | 0.018     |
| 202858_at   | U2AF1     | U2 small nuclear RNA auxiliary factor 1                                                              | 7307   | Hs.365116                      | 296.44        | 341.46      | 1.33        | 0.018     |
| 206279_at   | PRKY      | protein kinase, Y-linked                                                                             | 5616   | Hs.632287                      | 30.90         | 34.20       | 1.22        | 0.018     |
| 220348_at   |           |                                                                                                      | 80137  |                                | 32.41         | 29.33       | -1.22       | 0.018     |
| 207778_at   | REGL      | regenerating islet-derived-like, pancreatic stone protein-like, pancreatic thread protein-like (rat) | 5969   | Hs.49407, Hs.584797, Hs.654603 | 75.66         | 67.16       | -1.27       | 0.018     |
| 207403_at   | IRS4      | insulin receptor substrate 4                                                                         | 8471   | Hs.592215                      | 60.28         | 55.11       | -1.20       | 0.018     |
| 220461_at   | PCNXL2    | pecanex-like 2 (Drosophila)                                                                          | 80003  | Hs.370605                      | 56.10         | 49.38       | -1.29       | 0.018     |
| 205064_at   | SPRR1B    | small proline-rich protein 1B (cornifin)                                                             | 6699   | Hs.1076                        | 43.17         | 39.54       | -1.19       | 0.018     |
| 214606_at   | TSPAN2    | tetraspanin 2                                                                                        | 10100  | Hs.310458                      | 11.38         | 10.78       | -1.11       | 0.018     |
| 206991_s_at | CCR5      | chemokine (C-C motif) receptor 5                                                                     | 1234   | Hs.450802, Hs.536735           | 157.87        | 134.51      | -1.38       | 0.018     |
| 64486_at    | CORO1B    | coronin, actin binding protein, 1B                                                                   | 57175  | Hs.6191                        | 251.62        | 229.78      | -1.20       | 0.018     |
| 220243_at   | ZBTB44    | zinc finger and BTB domain containing 44                                                             | 29068  | Hs.178499                      | 111.55        | 96.43       | -1.34       | 0.018     |
| 220867_s_at | SLC24A2   | solute carrier family 24 (sodium/potassium/calcium exchanger), member 2                              | 25769  | Hs.283014                      | 91.30         | 80.06       | -1.30       | 0.018     |
| 206110_at   | HIST1H3H  | histone cluster 1, H3h                                                                               | 8357   | Hs.591778                      | 37.67         | 33.20       | -1.29       | 0.019     |

| Probe       | Symbol   | Description                                                                     | Gene  | UniGene              | Av Exp Female | Av Exp Male | Fold Change | adj P val |
|-------------|----------|---------------------------------------------------------------------------------|-------|----------------------|---------------|-------------|-------------|-----------|
| 215419_at   | KIAA1086 | KIAA1086                                                                        | 23217 | Hs.65750             | 39.56         | 36.64       | -1.17       | 0.019     |
| 221038_at   |          |                                                                                 | 55474 |                      | 21.52         | 20.39       | -1.11       | 0.019     |
| 207021_at   | ZPBP     | zona pellucida binding protein                                                  | 11055 | Hs.388841            | 29.12         | 26.84       | -1.18       | 0.019     |
| 212021_s_at | MKI67    | antigen identified by monoclonal antibody Ki-67                                 | 4288  | Hs.80976             | 98.13         | 87.07       | -1.27       | 0.019     |
| 221378_at   | CER1     | cerberus 1, cysteine knot superfamily, homolog (Xenopus laevis)                 | 9350  | Hs.248204            | 77.92         | 68.01       | -1.31       | 0.019     |
| 208761_s_at | SUMO1    | SMT3 suppressor of mif two 3 homolog 1 (S. cerevisiae)                          | 7341  | Hs.81424, Hs.596171  | 192.99        | 232.20      | 1.45        | 0.019     |
| 204822_at   | TTK      | TTK protein kinase                                                              | 7272  | Hs.169840            | 17.05         | 15.68       | -1.18       | 0.019     |
| 218651_s_at | LARP6    | La ribonucleoprotein domain family, member 6                                    | 55323 | Hs.416755            | 234.87        | 272.10      | 1.34        | 0.019     |
| 211778_s_at | OVOL2    | ovo-like 2 (Drosophila)                                                         | 58495 | Hs.660749, Hs.661013 | 45.55         | 41.30       | -1.22       | 0.019     |
| 220881_at   |          |                                                                                 | 55470 |                      | 57.65         | 50.04       | -1.33       | 0.019     |
| 200903_s_at | AHCY     | S-adenosylhomocysteine hydrolase                                                | 191   | Hs.388004            | 119.75        | 139.31      | 1.35        | 0.019     |
| 201952_at   | ALCAM    | activated leukocyte cell adhesion molecule                                      | 214   | Hs.591293            | 103.87        | 83.72       | -1.54       | 0.019     |
| 220581_at   | C6orf97  | chromosome 6 open reading frame 97                                              | 80129 | Hs.660044            | 36.63         | 33.02       | -1.23       | 0.019     |
| 220359_s_at | ARPP-21  | cyclic AMP-regulated phosphoprotein, 21 kD                                      | 10777 | Hs.475902            | 20.14         | 18.42       | -1.20       | 0.019     |
| 201287_s_at | SDC1     | syndecan 1                                                                      | 6382  | Hs.224607            | 67.77         | 59.49       | -1.30       | 0.019     |
| 218142_s_at | CRBN     | cereblon                                                                        | 51185 | Hs.18925             | 257.68        | 304.00      | 1.39        | 0.019     |
| 208045_at   | SPAR     | surfactant protein A binding protein                                            | 9981  |                      | 18.01         | 16.90       | -1.14       | 0.019     |
| 208434_at   | MDS1     | myelodysplasia syndrome 1                                                       | 4197  | Hs.656395, Hs.659873 | 45.78         | 39.79       | -1.32       | 0.019     |
| 219792_at   | AGMAT    | agmatine ureohydrolase (agmatinase)                                             | 79814 | Hs.567583            | 47.35         | 42.84       | -1.22       | 0.019     |
| 220347_at   |          |                                                                                 | 80091 |                      | 34.64         | 30.52       | -1.29       | 0.019     |
| 201774_s_at | NCAPD2   | non-SMC condensin I complex, subunit D2                                         | 9918  | Hs.5719              | 42.93         | 38.89       | -1.22       | 0.019     |
| 202025_x_at | ACAA1    | acetyl-Coenzyme A acyltransferase 1 (peroxisomal 3-oxoacyl-Coenzyme A thiolase) | 30    | Hs.693598            | 323.67        | 361.14      | 1.24        | 0.019     |
| 200913_at   | PPM1G    | protein phosphatase 1G (formerly 2C), magnesium-dependent, gamma isoform        | 5496  | Hs.17883             | 162.28        | 181.03      | 1.24        | 0.019     |

| Probe       | Symbol   | Description                                                                                     | Gene  | UniGene              | Av Exp Female | Av Exp Male | Fold Change | adj P val |
|-------------|----------|-------------------------------------------------------------------------------------------------|-------|----------------------|---------------|-------------|-------------|-----------|
| 203594_at   | RTCD1    | RNA terminal phosphate cyclase domain 1                                                         | 8634  | Hs.552835            | 116.58        | 149.95      | 1.65        | 0.019     |
| 221145_at   |          |                                                                                                 | 55371 |                      | 21.03         | 19.58       | -1.15       | 0.019     |
| 221184_at   |          |                                                                                                 | 80159 |                      | 43.27         | 38.50       | -1.26       | 0.019     |
| 216832_at   | RUNX1T1  | runt-related transcription factor 1; translocated to, 1 (cyclin D-related)                      | 862   | Hs.368431            | 125.00        | 113.25      | -1.22       | 0.019     |
| 200915_x_at | KTN1     | kinesin 1 (kinesin receptor)                                                                    | 3895  | Hs.509414            | 771.51        | 915.18      | 1.41        | 0.019     |
| 219829_at   | ITGB1BP2 | integrin beta 1 binding protein (melusin) 2                                                     | 26548 | Hs.109999            | 408.73        | 481.22      | 1.39        | 0.019     |
| 219030_at   | TPRKB    | TP53RK binding protein                                                                          | 51002 | Hs.157401            | 98.60         | 123.47      | 1.57        | 0.020     |
| 204510_at   | CDC7     | cell division cycle 7 homolog ( <i>S. cerevisiae</i> )                                          | 8317  | Hs.533573            | 26.36         | 24.21       | -1.19       | 0.020     |
| 217911_s_at | BAG3     | BCL2-associated athanogene 3                                                                    | 9531  | Hs.523309            | 694.01        | 825.29      | 1.41        | 0.020     |
| 204474_at   | ZNF142   | zinc finger protein 142                                                                         | 7701  | Hs.657969            | 131.69        | 118.76      | -1.23       | 0.020     |
| 220094_s_at | CCDC90A  | coiled-coil domain containing 90A                                                               | 63933 | Hs.214043            | 184.11        | 223.92      | 1.48        | 0.020     |
| 208676_s_at | PA2G4    | proliferation-associated 2G4, 38kDa                                                             | 5036  | Hs.524498, Hs.573018 | 260.27        | 287.85      | 1.22        | 0.020     |
| 204702_s_at | NFE2L3   | nuclear factor (erythroid-derived 2)-like 3                                                     | 9603  | Hs.404741, Hs.651505 | 16.10         | 15.04       | -1.14       | 0.020     |
| 218083_at   | PTGES2   | prostaglandin E synthase 2                                                                      | 80142 | Hs.495219            | 333.19        | 379.49      | 1.30        | 0.020     |
| 201241_at   | DDX1     | DEAD (Asp-Glu-Ala-Asp) box polypeptide 1                                                        | 1653  | Hs.440599            | 765.31        | 895.51      | 1.37        | 0.020     |
| 210518_at   | CDH8     | cadherin 8, type 2                                                                              | 1006  | Hs.368322            | 32.03         | 29.15       | -1.21       | 0.020     |
| 203169_at   | KIAA0258 | KIAA0258                                                                                        | 9827  | Hs.493804            | 84.80         | 94.02       | 1.23        | 0.020     |
| 219956_at   | GALNT6   | UDP-N-acetyl-alpha-D-galactosamine: polypeptide N-acetylgalactosaminyltransferase 6 (GalNAc-T6) | 11226 | Hs.505575            | 38.11         | 34.33       | -1.23       | 0.020     |
| 210442_at   | IL1RL1   | interleukin 1 receptor-like 1                                                                   | 9173  | Hs.66                | 104.36        | 92.75       | -1.27       | 0.020     |
| 220623_s_at | TSGA10   | testis specific, 10                                                                             | 80705 | Hs.120267            | 29.90         | 27.52       | -1.18       | 0.020     |
| 206538_at   | MRAS     | muscle RAS oncogene homolog                                                                     | 22808 | Hs.527021            | 172.48        | 199.57      | 1.34        | 0.020     |
| 206180_x_at | ZNF747   | zinc finger protein 747                                                                         | 65988 | Hs.592032            | 276.14        | 241.78      | -1.30       | 0.020     |
| 221388_at   | OR1A1    | olfactory receptor, family 1, subfamily A, member 1                                             | 8383  | Hs.532688            | 53.27         | 46.46       | -1.31       | 0.020     |
| 214354_x_at | SFTPB    | surfactant, pulmonary-associated protein B                                                      | 6439  | Hs.512690            | 167.76        | 144.32      | -1.35       | 0.020     |
| 208517_x_at | BTF3     | basic transcription factor 3                                                                    | 689   | Hs.591768            | 1340.37       | 1525.63     | 1.30        | 0.020     |

| Probe       | Symbol    | Description                                                                            | Gene   | UniGene              | Av Exp Female | Av Exp Male | Fold Change | adj P val |
|-------------|-----------|----------------------------------------------------------------------------------------|--------|----------------------|---------------|-------------|-------------|-----------|
| 210762_s_at | DLC1      | deleted in liver cancer 1                                                              | 10395  | Hs.134296            | 283.72        | 350.31      | 1.52        | 0.020     |
| 206887_at   | CCBP2     | chemokine binding protein 2                                                            | 1238   | Hs.656595            | 70.80         | 63.19       | -1.26       | 0.020     |
| 221412_at   | VN1R1     | vomeronasal 1 receptor 1                                                               | 57191  | Hs.388810, Hs.677423 | 22.97         | 21.18       | -1.18       | 0.020     |
| 207185_at   | SLC10A1   | solute carrier family 10 (sodium/bile acid cotransporter family), member 1             | 6554   | Hs.952               | 110.64        | 96.76       | -1.31       | 0.020     |
| 215211_at   | LOC730092 | RRN3 RNA polymerase I transcription factor homolog (S. cerevisiae) pseudogene          | 730092 | Hs.31290, Hs.348979  | 74.30         | 67.06       | -1.23       | 0.020     |
| 205948_at   | PTPRT     | protein tyrosine phosphatase, receptor type, T                                         | 11122  | Hs.526879            | 114.62        | 102.46      | -1.25       | 0.020     |
| 212231_at   | FBXO21    | F-box protein 21                                                                       | 23014  | Hs.159699            | 199.25        | 229.69      | 1.33        | 0.020     |
| 205599_at   | TRAF1     | TNF receptor-associated factor 1                                                       | 7185   | Hs.531251            | 67.35         | 59.98       | -1.26       | 0.020     |
| 221022_s_at | PMFBP1    | polyamine modulated factor 1 binding protein 1                                         | 83449  | Hs.151218            | 75.69         | 66.44       | -1.30       | 0.020     |
| 207445_s_at | CCR9      | chemokine (C-C motif) receptor 9                                                       | 10803  | Hs.225946            | 23.15         | 21.23       | -1.19       | 0.020     |
| 222327_x_at | OR7E156P  | olfactory receptor, family 7, subfamily E, member 156 pseudogene                       | 283491 | Hs.363054, Hs.694575 | 104.86        | 95.88       | -1.20       | 0.020     |
| 221430_s_at | RNF146    | ring finger protein 146                                                                | 81847  | Hs.267120            | 106.39        | 139.78      | 1.73        | 0.020     |
| 211388_s_at |           |                                                                                        | 51044  |                      | 66.15         | 60.42       | -1.20       | 0.020     |
| 206799_at   | SCGB1D2   | secretoglobin, family 1D, member 2                                                     | 10647  | Hs.204096            | 36.94         | 32.72       | -1.27       | 0.020     |
| 205336_at   | PVALB     | parvalbumin                                                                            | 5816   | Hs.295449            | 86.88         | 79.43       | -1.20       | 0.020     |
| 44822_s_at  | MIER2     | mesoderm induction early response 1, family member 2                                   | 54531  | Hs.101891            | 176.25        | 160.63      | -1.20       | 0.020     |
| 204744_s_at | IARS      | isoleucyl-tRNA synthetase                                                              | 3376   | Hs.445403            | 371.55        | 437.34      | 1.39        | 0.020     |
| 202121_s_at | CHMP2A    | chromatin modifying protein 2A                                                         | 27243  | Hs.12107             | 351.45        | 410.22      | 1.36        | 0.020     |
| 207865_s_at | BMP8B     | bone morphogenetic protein 8b (osteogenic protein 2)                                   | 656    | Hs.664022            | 31.32         | 28.37       | -1.22       | 0.020     |
| 220745_at   | IL19      | interleukin 19                                                                         | 29949  | Hs.661017            | 129.77        | 117.00      | -1.23       | 0.020     |
| 201906_s_at | CTDSPL    | CTD (carboxy-terminal domain, RNA polymerase II, polypeptide A) small phosphatase-like | 10217  | Hs.475963            | 188.26        | 215.23      | 1.31        | 0.020     |
| 212330_at   | TFDP1     | transcription factor Dp-                                                               | 7027   | Hs.79353             | 141.55        | 164.08      | 1.34        | 0.020     |



| Probe       | Symbol   | Description                                                                                    | Gene   | UniGene                                          | Av Exp Female | Av Exp Male | Fold Change | adj P val |
|-------------|----------|------------------------------------------------------------------------------------------------|--------|--------------------------------------------------|---------------|-------------|-------------|-----------|
|             |          | 1                                                                                              |        |                                                  |               |             |             |           |
| 201524_x_at | UBE2N    | ubiquitin-conjugating enzyme E2N (UBC13 homolog, yeast)                                        | 7334   | Hs.524630                                        | 486.07        | 546.92      | 1.27        | 0.020     |
| 207811_at   | KRT12    | keratin 12 (Meesmann corneal dystrophy)                                                        | 3859   | Hs.66739                                         | 40.80         | 36.82       | -1.23       | 0.020     |
| 204603_at   | EXO1     | exonuclease 1                                                                                  | 9156   | Hs.498248                                        | 57.56         | 51.22       | -1.26       | 0.020     |
| 208941_s_at | SEPHS1   | selenophosphate synthetase 1                                                                   | 22929  | Hs.124027                                        | 141.02        | 154.42      | 1.20        | 0.020     |
| 216676_x_at | KIR3DL3  | killer cell immunoglobulin-like receptor, three domains, long cytoplasmic tail, 3              | 115653 | Hs.645224                                        | 89.02         | 80.57       | -1.22       | 0.021     |
| 202916_s_at | FAM20B   | family with sequence similarity 20, member B                                                   | 9917   | Hs.5737,<br>Hs.77961,<br>Hs.449621,<br>Hs.618326 | 109.56        | 125.69      | 1.32        | 0.021     |
| 205747_at   | CBLN1    | cerebellin 1 precursor                                                                         | 869    | Hs.458423                                        | 28.64         | 25.85       | -1.23       | 0.021     |
| 209813_x_at | TRGV9    | T cell receptor gamma variable 9                                                               | 6983   | Hs.534032                                        | 83.75         | 70.59       | -1.41       | 0.021     |
| 206120_at   | CD33     | CD33 molecule                                                                                  | 945    | Hs.83731                                         | 181.14        | 158.44      | -1.31       | 0.021     |
| 208076_at   | HIST1H4D | histone cluster 1, H4d                                                                         | 8360   | Hs.248179                                        | 35.08         | 31.41       | -1.25       | 0.021     |
| 216134_at   | FRMD4B   | FERM domain containing 4B                                                                      | 23150  | Hs.371681                                        | 49.10         | 45.24       | -1.18       | 0.021     |
| 216226_at   | TAF4B    | TAF4b RNA polymerase II, TATA box binding protein (TBP)-associated factor, 105kDa              | 6875   | Hs.369519                                        | 49.37         | 44.48       | -1.23       | 0.021     |
| 201823_s_at | RNF14    | ring finger protein 14                                                                         | 9604   | Hs.483616                                        | 101.13        | 133.70      | 1.75        | 0.021     |
| 206873_at   | CA6      | carbonic anhydrase VI                                                                          | 765    | Hs.100322                                        | 89.81         | 81.66       | -1.21       | 0.021     |
| 216862_s_at | MTCP1    | mature T-cell proliferation 1                                                                  | 4515   | Hs.6917                                          | 456.93        | 531.95      | 1.36        | 0.021     |
| 215969_at   | PIGA     | phosphatidylinositol glycan anchor biosynthesis, class A (paroxysmal nocturnal hemoglobinuria) | 5277   | Hs.137154                                        | 17.65         | 16.21       | -1.18       | 0.021     |
| 200738_s_at | PGK1     | phosphoglycerate kinase 1                                                                      | 5230   | Hs.78771                                         | 1372.96       | 1568.19     | 1.30        | 0.021     |
| 221125_s_at | KCNMB3   | potassium large conductance calcium-activated channel, subfamily M beta member 3               | 27094  | Hs.591285                                        | 85.73         | 78.22       | -1.20       | 0.021     |
| 220250_at   | ZNF286A  | zinc finger protein 286A                                                                       | 57335  | Hs.585799,<br>Hs.659318,<br>Hs.660199            | 70.13         | 63.81       | -1.21       | 0.021     |
| 213266_at   | 76P      | gamma tubulin ring                                                                             | 27229  | Hs.654843                                        | 116.23        | 102.54      | -1.28       | 0.021     |

| Probe       | Symbol    | Description                                                                        | Gene   | UniGene                                             | Av Exp Female | Av Exp Male | Fold Change | adj P val |
|-------------|-----------|------------------------------------------------------------------------------------|--------|-----------------------------------------------------|---------------|-------------|-------------|-----------|
| 201950_x_at | CAPZB     | complex protein (76p gene)<br>capping protein (actin filament) muscle Z-line, beta | 832    | Hs.432760                                           | 522.73        | 620.87      | 1.41        | 0.021     |
| 209174_s_at | QRICH1    | glutamine-rich 1                                                                   | 54870  | Hs.297389                                           | 218.35        | 238.97      | 1.20        | 0.021     |
| 201805_at   | PRKAG1    | protein kinase, AMP-activated, gamma 1 non-catalytic subunit                       | 5571   | Hs.530862                                           | 526.55        | 592.23      | 1.27        | 0.021     |
| 211811_s_at | PCDHA6    | protocadherin alpha 6                                                              | 56142  | Hs.199343,<br>Hs.570901,<br>Hs.599714,<br>Hs.621225 | 22.06         | 20.17       | -1.20       | 0.021     |
| 217102_at   | MAG       | malignancy-associated protein                                                      | 27307  | Hs.348346                                           | 146.99        | 132.46      | -1.23       | 0.021     |
| 207534_at   | MAGEB1    | melanoma antigen family B, 1                                                       | 4112   | Hs.73021                                            | 22.38         | 20.77       | -1.16       | 0.021     |
| 202504_at   | TRIM29    | tripartite motif-containing 29                                                     | 23650  | Hs.504115                                           | 108.63        | 98.13       | -1.23       | 0.021     |
| 204385_at   | KYNU      | kynureninase (L-kynurenine hydrolase)                                              | 8942   | Hs.470126                                           | 160.22        | 145.17      | -1.22       | 0.021     |
| 202783_at   | NNT       | nicotinamide nucleotide transhydrogenase                                           | 23530  | Hs.482043                                           | 317.38        | 410.94      | 1.68        | 0.021     |
| 205673_s_at | ASB9      | ankyrin repeat and SOCS box-containing 9                                           | 140462 | Hs.19404                                            | 47.90         | 43.64       | -1.20       | 0.021     |
| 216714_at   | CCL13     | chemokine (C-C motif) ligand 13                                                    | 6357   | Hs.414629                                           | 98.36         | 88.65       | -1.23       | 0.021     |
| 209063_x_at | LOC645139 | similar to poly(A) binding protein interacting protein 1 isoform 1                 | 645139 | Hs.567929                                           | 284.50        | 333.31      | 1.37        | 0.021     |
| 221199_at   | GFRA4     | GDNF family receptor alpha 4                                                       | 64096  | Hs.302025                                           | 132.92        | 119.18      | -1.24       | 0.021     |
| 200681_at   | GLO1      | glyoxalase I                                                                       | 2739   | Hs.268849                                           | 665.35        | 762.86      | 1.31        | 0.021     |
| 205587_at   | FGFR1OP   | FGFR1 oncogene partner                                                             | 11116  | Hs.487175                                           | 63.87         | 57.19       | -1.25       | 0.021     |
| 206334_at   | LIPF      | lipase, gastric                                                                    | 8513   | Hs.523130                                           | 23.45         | 21.84       | -1.15       | 0.021     |
| 218549_s_at | FAM82B    | family with sequence similarity 82, member B                                       | 51115  | Hs.145386                                           | 131.77        | 163.28      | 1.54        | 0.021     |
| 206119_at   | BHMT      | betaine-homocysteine methyltransferase                                             | 635    | Hs.80756                                            | 87.82         | 76.40       | -1.32       | 0.021     |
| 221247_s_at | WBSCR16   | Williams-Beuren syndrome chromosome region 16                                      | 81554  | Hs.647031                                           | 161.74        | 178.99      | 1.22        | 0.021     |
| 219334_s_at | OBFC2A    | oligonucleotide/oligosaccharide-binding fold containing 2A                         | 64859  | Hs.591610                                           | 12.01         | 11.37       | -1.12       | 0.021     |
| 203588_s_at | TFDP2     | transcription factor Dp-2 (E2F dimerization partner 2)                             | 7029   | Hs.379018                                           | 139.16        | 153.15      | 1.21        | 0.021     |
| 212627_s_at | EXOSC7    | exosome component 7                                                                | 23016  | Hs.115792                                           | 179.01        | 203.51      | 1.29        | 0.021     |

| Probe       | Symbol   | Description                                                                | Gene   | UniGene              | Av Exp Female | Av Exp Male | Fold Change | adj P val |
|-------------|----------|----------------------------------------------------------------------------|--------|----------------------|---------------|-------------|-------------|-----------|
| 219051_x_at | METR1    | meteorin, glial cell differentiation regulator                             | 79006  | Hs.533772            | 184.27        | 224.01      | 1.48        | 0.021     |
| 206189_at   | UNC5C    | unc-5 homolog C (C. elegans)                                               | 8633   | Hs.584831            | 24.33         | 22.58       | -1.16       | 0.021     |
| 220179_at   | DPEP3    | dipeptidase 3                                                              | 64180  | Hs.302028            | 59.19         | 53.85       | -1.21       | 0.021     |
| 207364_at   | TEX28    | testis expressed 28                                                        | 1527   | Hs.115365            | 56.23         | 50.41       | -1.24       | 0.021     |
| 208182_x_at | IFNA14   | interferon, alpha 14                                                       | 3448   | Hs.93907             | 64.91         | 57.14       | -1.29       | 0.021     |
| 204890_s_at | LCK      | lymphocyte-specific protein tyrosine kinase                                | 3932   | Hs.470627            | 57.64         | 49.11       | -1.38       | 0.022     |
| 205411_at   | STK4     | serine/threonine kinase 4                                                  | 6789   | Hs.472838            | 38.91         | 35.59       | -1.20       | 0.022     |
| 208564_at   | KCNA2    | potassium voltage-gated channel, shaker-related subfamily, member 2        | 3737   | Hs.248139, Hs.657199 | 65.46         | 59.04       | -1.23       | 0.022     |
| 219716_at   | APOL6    | apolipoprotein L, 6                                                        | 80830  | Hs.257352            | 82.09         | 70.36       | -1.36       | 0.022     |
| 218867_s_at | C12orf49 | chromosome 12 open reading frame 49                                        | 79794  | Hs.592011            | 87.23         | 77.70       | -1.26       | 0.022     |
| 217918_at   | DYNLRB1  | dynein, light chain, roadblock-type 1                                      | 83658  | Hs.593920            | 719.64        | 827.96      | 1.32        | 0.022     |
| 208427_s_at | ELAVL2   | ELAV (embryonic lethal, abnormal vision, Drosophila)-like 2 (Hu antigen B) | 1993   | Hs.166109            | 15.12         | 13.98       | -1.17       | 0.022     |
| 201336_at   | VAMP3    | vesicle-associated membrane protein 3 (cellubrevin)                        | 9341   | Hs.66708             | 596.71        | 676.66      | 1.29        | 0.022     |
| 220882_at   |          |                                                                            | 55476  |                      | 126.39        | 113.96      | -1.23       | 0.022     |
| 217837_s_at | VPS24    | vacuolar protein sorting 24 homolog (S. cerevisiae)                        | 51652  | Hs.591582            | 344.56        | 406.14      | 1.39        | 0.022     |
| 218666_s_at | STX17    | syntaxin 17                                                                | 55014  | Hs.655706            | 100.54        | 90.14       | -1.24       | 0.022     |
| 210029_at   | INDO     | indoleamine-pyrrole 2,3 dioxygenase                                        | 3620   | Hs.840               | 125.94        | 103.54      | -1.48       | 0.022     |
| 202793_at   | MBOAT5   | membrane bound O-acyltransferase domain containing 5                       | 10162  | Hs.655248            | 78.99         | 90.34       | 1.31        | 0.022     |
| 215124_at   | ZNF550   | zinc finger protein 550                                                    | 162972 | Hs.180257            | 53.53         | 48.30       | -1.23       | 0.022     |
| 208350_at   | CSN1S1   | casein alpha s1                                                            | 1446   | Hs.3155              | 20.77         | 19.40       | -1.15       | 0.022     |
| 221275_s_at |          |                                                                            | 79826  |                      | 29.16         | 26.94       | -1.17       | 0.022     |
| 203880_at   | COX17    | COX17 cytochrome c oxidase assembly homolog (S. cerevisiae)                | 10063  | Hs.534383            | 505.42        | 605.15      | 1.43        | 0.022     |
| 215186_at   | KIAA0984 | KIAA0984 protein                                                           | 23329  | Hs.192492            | 78.70         | 70.99       | -1.23       | 0.022     |
| 210950_s_at | FDFT1    | farnesyl-diphosphate farnesyltransferase 1                                 | 2222   | Hs.593928            | 446.38        | 503.99      | 1.27        | 0.022     |
| 212266_s_at | SFRS5    | splicing factor, arginine/serine-rich 5                                    | 6430   | Hs.632326            | 545.03        | 682.28      | 1.57        | 0.022     |
| 216273_at   | ZNF460   | zinc finger protein 460                                                    | 10794  | Hs.99971             | 111.16        | 100.00      | -1.24       | 0.022     |

| Probe       | Symbol   | Description                                                                      | Gene  | UniGene                 | Av Exp Female | Av Exp Male | Fold Change | adj P val |
|-------------|----------|----------------------------------------------------------------------------------|-------|-------------------------|---------------|-------------|-------------|-----------|
| 205829_at   | HSD17B1  | hydroxysteroid (17-beta) dehydrogenase 1                                         | 3292  | Hs.654385,<br>Hs.655222 | 15.48         | 14.28       | -1.18       | 0.022     |
| 218755_at   | KIF20A   | kinesin family member 20A                                                        | 10112 | Hs.73625                | 24.57         | 22.11       | -1.24       | 0.022     |
| 215251_at   | SHANK2   | SH3 and multiple ankyrin repeat domains 2                                        | 22941 | Hs.268726               | 43.63         | 39.38       | -1.23       | 0.022     |
| 220381_at   | ARHGAP28 | Rho GTPase activating protein 28                                                 | 79822 | Hs.183114               | 43.24         | 39.49       | -1.20       | 0.022     |
| 206569_at   | IL24     | interleukin 24                                                                   | 11009 | Hs.58831,<br>Hs.658964  | 34.21         | 31.38       | -1.19       | 0.022     |
| 201527_at   | ATP6V1F  | ATPase, H+ transporting, lysosomal 14kDa, V1 subunit F                           | 9296  | Hs.78089                | 560.60        | 636.32      | 1.29        | 0.022     |
| 210092_at   | MAGOH    | mago-nashi homolog, proliferation-associated (Drosophila)                        | 4116  | Hs.421576               | 67.95         | 82.46       | 1.47        | 0.022     |
| 209076_s_at | WDR45L   | WDR45-like                                                                       | 56270 | Hs.132161               | 243.62        | 274.28      | 1.27        | 0.022     |
| 221382_at   | OR2N1P   | olfactory receptor, family 2, subfamily N, member 1 pseudogene                   | 26701 |                         | 158.33        | 139.38      | -1.29       | 0.022     |
| 219600_s_at | TMEM50B  | transmembrane protein 50B                                                        | 757   | Hs.433668               | 158.88        | 201.76      | 1.61        | 0.022     |
| 215809_at   | CYP2D6   | cytochrome P450, family 2, subfamily D, polypeptide 6                            | 1565  | Hs.648256               | 176.01        | 158.67      | -1.23       | 0.022     |
| 220665_at   | LUZP4    | leucine zipper protein 4                                                         | 51213 | Hs.242183               | 91.05         | 82.94       | -1.21       | 0.022     |
| 221600_s_at | C11orf67 | chromosome 11 open reading frame 67                                              | 28971 | Hs.503357               | 217.43        | 255.01      | 1.38        | 0.022     |
| 221238_at   | NSBP1    | nucleosomal binding protein 1                                                    | 79366 | Hs.282204               | 26.69         | 24.49       | -1.19       | 0.022     |
| 211753_s_at | RLN1     | relaxin 1                                                                        | 6013  | Hs.368996               | 37.52         | 34.81       | -1.16       | 0.022     |
| 209393_s_at | EIF4E2   | eukaryotic translation initiation factor 4E family member 2                      | 9470  | Hs.292026,<br>Hs.693903 | 144.94        | 166.47      | 1.32        | 0.022     |
| 213133_s_at | GCSH     | glycine cleavage system protein H (aminomethyl carrier)                          | 2653  | Hs.546256               | 230.79        | 272.79      | 1.40        | 0.022     |
| 201015_s_at | JUP      | junction plakoglobin                                                             | 3728  | Hs.514174               | 345.89        | 407.84      | 1.39        | 0.022     |
| 220294_at   | KCNV1    | potassium channel, subfamily V, member 1                                         | 27012 | Hs.13285                | 14.57         | 13.68       | -1.13       | 0.022     |
| 202840_at   | TAF15    | TAF15 RNA polymerase II, TATA box binding protein (TBP)-associated factor, 68kDa | 8148  | Hs.402752               | 101.80        | 124.01      | 1.48        | 0.022     |
| 216800_at   |          |                                                                                  | 84198 |                         | 71.51         | 65.03       | -1.21       | 0.022     |
| 217998_at   | PHLDA1   | pleckstrin homology-like domain, family A, member 1                              | 22822 | Hs.602085               | 222.36        | 197.63      | -1.27       | 0.022     |

| Probe       | Symbol    | Description                                                                     | Gene   | UniGene                               | Av Exp Female | Av Exp Male | Fold Change | adj P val |
|-------------|-----------|---------------------------------------------------------------------------------|--------|---------------------------------------|---------------|-------------|-------------|-----------|
| 218616_at   | INTS12    | integrator complex subunit 12                                                   | 57117  | Hs.480454                             | 112.18        | 129.78      | 1.34        | 0.022     |
| 200978_at   | MDH1      | malate dehydrogenase 1, NAD (soluble)                                           | 4190   | Hs.526521                             | 4744.34       | 5276.81     | 1.24        | 0.022     |
| 211938_at   | EIF4B     | eukaryotic translation initiation factor 4B                                     | 1975   | Hs.648394,<br>Hs.655133               | 723.37        | 826.21      | 1.30        | 0.022     |
| 59433_at    | LOC729137 | hypothetical protein LOC729137                                                  | 729137 | Hs.636199                             | 66.32         | 59.78       | -1.23       | 0.022     |
| 212833_at   | SLC25A46  | solute carrier family 25, member 46                                             | 91137  | Hs.75639                              | 194.47        | 238.55      | 1.50        | 0.022     |
| 217980_s_at | MRPL16    | mitochondrial ribosomal protein L16                                             | 54948  | Hs.530734                             | 270.91        | 311.31      | 1.32        | 0.023     |
| 206367_at   | REN       | renin                                                                           | 5972   | Hs.3210                               | 77.25         | 69.24       | -1.24       | 0.023     |
| 206571_s_at | MAP4K4    | mitogen-activated protein kinase kinase kinase 4                                | 9448   | Hs.431550                             | 92.31         | 107.15      | 1.35        | 0.023     |
| 216673_at   | TTY1      | testis-specific transcript, Y-linked 1                                          | 50858  | Hs.694006                             | 53.90         | 49.22       | -1.20       | 0.023     |
| 201832_s_at | VDP       | vesicle docking protein p115                                                    | 8615   | Hs.292689                             | 372.15        | 435.72      | 1.37        | 0.023     |
| 203774_at   | MTR       | 5-methyltetrahydrofolate-homocysteine methyltransferase                         | 4548   | Hs.498187                             | 83.87         | 100.83      | 1.45        | 0.023     |
| 213449_at   | POP1      | processing of precursor 1, ribonuclease P/MRP subunit ( <i>S. cerevisiae</i> )  | 10940  | Hs.252828                             | 41.97         | 37.71       | -1.24       | 0.023     |
| 214645_at   |           |                                                                                 | 80103  |                                       | 15.06         | 14.10       | -1.14       | 0.023     |
| 205778_at   | KLK7      | kallikrein-related peptidase 7                                                  | 5650   | Hs.151254                             | 42.97         | 39.43       | -1.19       | 0.023     |
| 214796_at   | C8orf79   | chromosome 8 open reading frame 79                                              | 57604  | Hs.121518,<br>Hs.202521,<br>Hs.591846 | 14.86         | 13.90       | -1.14       | 0.023     |
| 220009_at   | LONRF3    | LON peptidase N-terminal domain and ring finger 3                               | 79836  | Hs.144266                             | 69.30         | 61.43       | -1.27       | 0.023     |
| 212541_at   | FLAD1     | FAD1 flavin adenine dinucleotide synthetase homolog ( <i>S. cerevisiae</i> )    | 80308  | Hs.118666                             | 82.01         | 89.75       | 1.20        | 0.023     |
| 221381_s_at | MORF4     | mortality factor 4                                                              | 10934  | Hs.534391                             | 228.00        | 284.03      | 1.55        | 0.023     |
| 217955_at   | BCL2L13   | BCL2-like 13 (apoptosis facilitator)                                            | 23786  | Hs.631672                             | 132.93        | 161.21      | 1.47        | 0.023     |
| 205367_at   | SH2B2     | SH2B adaptor protein 2                                                          | 10603  | Hs.489448                             | 71.08         | 62.02       | -1.31       | 0.023     |
| 210434_x_at | JTB       | jumping translocation breakpoint                                                | 10899  | Hs.6396                               | 855.75        | 950.85      | 1.23        | 0.023     |
| 215479_at   | SEMA6A    | sema domain, transmembrane domain (TM), and cytoplasmic domain, (semaphorin) 6A | 57556  | Hs.156967                             | 211.37        | 188.08      | -1.26       | 0.023     |

| Probe       | Symbol   | Description                                                                      | Gene   | UniGene                               | Av Exp<br>Female | Av Exp<br>Male | Fold<br>Change | adj P val |
|-------------|----------|----------------------------------------------------------------------------------|--------|---------------------------------------|------------------|----------------|----------------|-----------|
| 206995_x_at | SCARF1   | scavenger receptor<br>class F, member 1                                          | 8578   | Hs.647430                             | 12.90            | 12.19          | -1.12          | 0.023     |
| 207479_at   |          |                                                                                  | 55477  |                                       | 18.74            | 17.59          | -1.14          | 0.023     |
| 208384_s_at | MID2     | midline 2                                                                        | 11043  | Hs.12256                              | 165.69           | 148.32         | -1.25          | 0.023     |
| 216161_at   | SBNO1    | strawberry notch<br>homolog 1 (Drosophila)                                       | 55206  | Hs.577403                             | 32.00            | 29.50          | -1.18          | 0.023     |
| 38340_at    | HIP1R    | huntingtin interacting<br>protein 1 related                                      | 9026   | Hs.524815,<br>Hs.654842               | 196.03           | 176.34         | -1.24          | 0.023     |
| 214772_at   | C11orf41 | chromosome 11 open<br>reading frame 41                                           | 25758  | Hs.22270,<br>Hs.502266                | 20.69            | 19.16          | -1.17          | 0.023     |
| 222015_at   | CSNK1E   | casein kinase 1, epsilon                                                         | 1454   | Hs.474833                             | 184.67           | 167.96         | -1.21          | 0.023     |
| 214614_at   | MNX1     | motor neuron and<br>pancreas homeobox 1                                          | 3110   | Hs.37035                              | 100.60           | 92.11          | -1.19          | 0.023     |
| 202078_at   | COPS3    | COP9 constitutive<br>photomorphogenic<br>homolog subunit 3<br>(Arabidopsis)      | 8533   | Hs.6076                               | 225.89           | 258.58         | 1.31           | 0.024     |
| 215284_at   | SNX9     | sorting nexin 9                                                                  | 51429  | Hs.191213                             | 20.63            | 19.06          | -1.17          | 0.024     |
| 206273_at   | SLMO1    | slowmo homolog 1<br>(Drosophila)                                                 | 10650  | Hs.514718                             | 56.29            | 50.44          | -1.25          | 0.024     |
| 216517_at   | IGKV1D-8 | immunoglobulin kappa<br>variable 1D-8                                            | 28904  | Hs.574701                             | 24.76            | 22.07          | -1.26          | 0.024     |
| 212806_at   |          |                                                                                  | 23273  |                                       | 18.02            | 16.67          | -1.17          | 0.024     |
| 208847_s_at | ADH5     | alcohol dehydrogenase<br>5 (class III), chi<br>polypeptide                       | 128    | Hs.78989                              | 396.90           | 458.48         | 1.33           | 0.024     |
| 205137_x_at | USH1C    | Usher syndrome 1C<br>(autosomal recessive,<br>severe)                            | 10083  | Hs.502072                             | 100.06           | 88.28          | -1.28          | 0.024     |
| 221172_at   | FLJ21075 | hypothetical protein<br>FLJ21075                                                 | 80099  | Hs.287647                             | 60.76            | 54.54          | -1.24          | 0.024     |
| 216291_at   | ZNF440   | zinc finger protein 440                                                          | 126070 | Hs.418192                             | 23.00            | 21.03          | -1.20          | 0.024     |
| 220218_at   | C9orf68  | chromosome 9 open<br>reading frame 68                                            | 55064  | Hs.179615                             | 25.77            | 23.57          | -1.19          | 0.024     |
| 219903_s_at | CYP2C8   | cytochrome P450,<br>family 2, subfamily C,<br>polypeptide 8                      | 1558   | Hs.282871                             | 23.92            | 22.19          | -1.16          | 0.024     |
| 214646_at   | HIST1H3J | histone cluster 1, H3j                                                           | 8356   | Hs.484990                             | 64.92            | 57.54          | -1.27          | 0.024     |
| 209804_at   | DCLRE1A  | DNA cross-link repair<br>1A (PSO2 homolog, S.<br>cerevisiae)                     | 9937   | Hs.1560                               | 68.96            | 63.72          | -1.17          | 0.024     |
| 206846_s_at | HDAC6    | histone deacetylase 6                                                            | 10013  | Hs.6764                               | 183.04           | 167.96         | -1.19          | 0.024     |
| 215821_x_at | PSG1     | pregnancy specific<br>beta-1-glycoprotein 1                                      | 5669   | Hs.654413                             | 147.12           | 129.36         | -1.29          | 0.024     |
| 212145_at   | MRPS27   | mitochondrial ribosomal<br>protein S27                                           | 23107  | Hs.482491                             | 271.86           | 307.03         | 1.28           | 0.024     |
| 209893_s_at | FUT4     | fucosyltransferase 4<br>(alpha (1,3)<br>fucosyltransferase,<br>myeloid-specific) | 2526   | Hs.390420,<br>Hs.572064,<br>Hs.623098 | 50.88            | 46.30          | -1.21          | 0.024     |

| Probe       | Symbol  | Description                                                                       | Gene   | UniGene              | Av Exp Female | Av Exp Male | Fold Change | adj P val |
|-------------|---------|-----------------------------------------------------------------------------------|--------|----------------------|---------------|-------------|-------------|-----------|
| 204073_s_at | C11orf9 | chromosome 11 open reading frame 9                                                | 745    | Hs.473109            | 71.00         | 64.03       | -1.23       | 0.024     |
| 221271_at   | IL21    | interleukin 21                                                                    | 59067  | Hs.567559            | 87.59         | 79.85       | -1.20       | 0.024     |
| 203418_at   | CCNA2   | cyclin A2                                                                         | 890    | Hs.58974             | 37.52         | 34.05       | -1.21       | 0.024     |
| 215527_at   | KHDRBS2 | KH domain containing, RNA binding, signal transduction associated 2               | 202559 | Hs.519794            | 85.31         | 75.64       | -1.27       | 0.024     |
| 211978_x_at | PPIA    | peptidylprolyl isomerase A (cyclophilin A)                                        | 5478   | Hs.356331, Hs.598115 | 2393.54       | 2653.42     | 1.23        | 0.024     |
| 207780_at   | CYLC2   | cylicin, basic protein of sperm head cytoskeleton 2                               | 1539   | Hs.3232              | 26.37         | 24.41       | -1.17       | 0.024     |
| 219584_at   | PLA1A   | phospholipase A1 member A                                                         | 51365  | Hs.437451            | 59.86         | 49.50       | -1.46       | 0.024     |
| 201499_s_at | USP7    | ubiquitin specific peptidase 7 (herpes virus-associated)                          | 7874   | Hs.386939            | 294.59        | 331.21      | 1.26        | 0.024     |
| 211381_x_at | SPAG11B | sperm associated antigen 11B                                                      | 10407  | Hs.2717              | 34.70         | 30.76       | -1.27       | 0.024     |
| 201027_s_at | EIF5B   | eukaryotic translation initiation factor 5B                                       | 9669   | Hs.158688            | 289.53        | 343.26      | 1.41        | 0.024     |
| 214607_at   | PAK3    | p21 (CDKN1A)-activated kinase 3                                                   | 5063   | Hs.656789            | 126.52        | 111.79      | -1.28       | 0.024     |
| 203039_s_at | NDUFS1  | NADH dehydrogenase (ubiquinone) Fe-S protein 1, 75kDa (NADH-coenzyme Q reductase) | 4719   | Hs.471207            | 808.17        | 948.24      | 1.38        | 0.024     |
| 212535_at   | LYSMD4  | LysM, putative peptidoglycan-binding, domain containing 4                         | 145748 | Hs.562568            | 683.97        | 788.78      | 1.33        | 0.024     |
| 217615_at   | LRRC37A | leucine rich repeat containing 37A                                                | 9884   | Hs.656994            | 38.32         | 35.01       | -1.20       | 0.024     |
| 210695_s_at | WWOX    | WW domain containing oxidoreductase                                               | 51741  | Hs.461453            | 202.40        | 185.33      | -1.19       | 0.024     |
| 205861_at   | SPIB    | Spi-B transcription factor (Spi-1/PU.1 related)                                   | 6689   | Hs.437905            | 77.57         | 69.43       | -1.25       | 0.024     |
| 218970_s_at | CUTC    | cutC copper transporter homolog (E. coli)                                         | 51076  | Hs.16606             | 145.78        | 169.91      | 1.36        | 0.024     |
| 213557_at   |         |                                                                                   | 23106  |                      | 83.82         | 77.67       | -1.16       | 0.024     |
| 203814_s_at | NQO2    | NAD(P)H dehydrogenase, quinone 2                                                  | 4835   | Hs.533050            | 220.23        | 286.63      | 1.69        | 0.024     |
| 206102_at   | GINS1   | GINS complex subunit 1 (Psf1 homolog)                                             | 9837   | Hs.658464            | 20.39         | 18.60       | -1.20       | 0.024     |
| 216493_s_at | IGF2BP3 | insulin-like growth factor 2 mRNA binding protein 3                               | 10643  | Hs.648088            | 22.92         | 21.44       | -1.14       | 0.024     |

| Probe       | Symbol    | Description                                                           | Gene   | UniGene                 | Av Exp<br>Female | Av Exp<br>Male | Fold<br>Change | adj P val |
|-------------|-----------|-----------------------------------------------------------------------|--------|-------------------------|------------------|----------------|----------------|-----------|
| 214476_at   | TFF2      | trefoil factor 2<br>(spasmolytic protein 1)                           | 7032   | Hs.2979                 | 53.04            | 47.70          | -1.24          | 0.024     |
| 202290_at   | PDAP1     | PDGFA associated<br>protein 1                                         | 11333  | Hs.632296               | 121.02           | 153.66         | 1.61           | 0.024     |
| 208622_s_at | VIL2      | villin 2 (ezrin)                                                      | 7430   | Hs.693594               | 281.38           | 349.49         | 1.54           | 0.024     |
| 220689_at   | NODAL     | nodal homolog (mouse)                                                 | 4838   | Hs.370414               | 107.52           | 95.12          | -1.28          | 0.024     |
| 204565_at   | THEM2     | thioesterase<br>superfamily member 2                                  | 55856  | Hs.9676                 | 299.74           | 356.24         | 1.41           | 0.024     |
| 211596_s_at | LRIG1     | leucine-rich repeats and<br>immunoglobulin-like<br>domains 1          | 26018  | Hs.518055               | 210.27           | 251.61         | 1.43           | 0.024     |
| 214493_s_at | INADL     | InaD-like (Drosophila)                                                | 10207  | Hs.478125               | 29.42            | 34.18          | 1.35           | 0.024     |
| 208573_s_at | OR2H2     | olfactory receptor,<br>family 2, subfamily H,<br>member 2             | 7932   | Hs.529493,<br>Hs.639423 | 41.50            | 37.27          | -1.24          | 0.024     |
| 201630_s_at | ACP1      | acid phosphatase 1,<br>soluble                                        | 52     | Hs.558296               | 279.76           | 322.16         | 1.33           | 0.024     |
| 213444_at   | LOC643641 | hypothetical protein<br>LOC643641                                     | 643641 | Hs.301277,<br>Hs.694815 | 198.16           | 181.79         | -1.19          | 0.024     |
| 207781_s_at | ZNF711    | zinc finger protein 711                                               | 7552   | Hs.326801               | 12.04            | 11.48          | -1.10          | 0.024     |
| 205156_s_at | ACCN2     | amiloride-sensitive<br>cation channel 2,<br>neuronal                  | 41     | Hs.274361,<br>Hs.647113 | 202.78           | 184.84         | -1.20          | 0.024     |
| 216973_s_at | HOXB7     | homeobox B7                                                           | 3217   | Hs.436181               | 59.33            | 55.95          | -1.12          | 0.024     |
| 217990_at   | GMPR2     | guanosine<br>monophosphate<br>reductase 2                             | 51292  | Hs.368855               | 130.75           | 145.58         | 1.24           | 0.025     |
| 219704_at   | YBX2      | Y box binding protein 2                                               | 51087  | Hs.567494               | 67.13            | 61.58          | -1.19          | 0.025     |
| 211481_at   | SLCO1A2   | solute carrier organic<br>anion transporter<br>family, member 1A2     | 6579   | Hs.46440                | 85.72            | 78.46          | -1.19          | 0.025     |
| 207614_s_at | CUL1      | cullin 1                                                              | 8454   | Hs.146806               | 120.59           | 141.15         | 1.37           | 0.025     |
| 220422_at   | UBQLN3    | ubiquilin 3                                                           | 50613  | Hs.189184               | 32.94            | 29.82          | -1.22          | 0.025     |
| 210963_s_at | GYG2      | glycogenin 2                                                          | 8908   | Hs.567381               | 87.28            | 77.91          | -1.25          | 0.025     |
| 212530_at   | NEK7      | NIMA (never in mitosis<br>gene a)-related kinase<br>7                 | 140609 | Hs.24119                | 764.04           | 970.27         | 1.61           | 0.025     |
| 206212_at   | CPA2      | carboxypeptidase A2<br>(pancreatic)                                   | 1358   | Hs.490038               | 77.14            | 69.67          | -1.23          | 0.025     |
| 205348_s_at | DYNC111   | dynein, cytoplasmic 1,<br>intermediate chain 1                        | 1780   | Hs.440364               | 181.84           | 214.58         | 1.39           | 0.025     |
| 202188_at   | NUP93     | nucleoporin 93kDa                                                     | 9688   | Hs.276878               | 158.58           | 171.64         | 1.17           | 0.025     |
| 202255_s_at | SIPA1L1   | signal-induced<br>proliferation-associated<br>1 like 1                | 26037  | Hs.654657               | 119.78           | 109.86         | -1.19          | 0.025     |
| 205896_at   | SLC22A4   | solute carrier family 22<br>(organic cation<br>transporter), member 4 | 6583   | Hs.310591,<br>Hs.640104 | 44.68            | 40.77          | -1.20          | 0.025     |
| 218487_at   | ALAD      | aminolevulinatase, delta-,<br>dehydratase                             | 210    | Hs.1227                 | 180.19           | 214.66         | 1.42           | 0.025     |



| Probe       | Symbol   | Description                                                | Gene   | UniGene              | Av Exp<br>Female | Av Exp<br>Male | Fold<br>Change | adj P val |
|-------------|----------|------------------------------------------------------------|--------|----------------------|------------------|----------------|----------------|-----------|
| 205899_at   | CCNA1    | cyclin A1                                                  | 8900   | Hs.417050            | 30.94            | 28.75          | -1.16          | 0.025     |
| 216945_x_at | PASK     | PAS domain containing serine/threonine kinase              | 23178  | Hs.694813            | 64.69            | 57.97          | -1.25          | 0.025     |
| 211460_at   | TTY9A    | testis-specific transcript, Y-linked 9A                    | 83864  | Hs.567607            | 48.52            | 43.43          | -1.25          | 0.025     |
| 221690_s_at | NLRP2    | NLR family, pyrin domain containing 2                      | 55655  | Hs.369279            | 41.39            | 38.44          | -1.16          | 0.025     |
| 200982_s_at | ANXA6    | annexin A6                                                 | 309    | Hs.412117            | 348.77           | 428.96         | 1.51           | 0.025     |
| 219191_s_at | BIN2     | bridging integrator 2                                      | 51411  | Hs.14770             | 84.07            | 71.97          | -1.36          | 0.025     |
| 208189_s_at | MYO7A    | myosin VIIA                                                | 4647   | Hs.370421            | 131.37           | 116.47         | -1.27          | 0.025     |
| 202136_at   | ZMYND11  | zinc finger, MYND domain containing 11                     | 10771  | Hs.292265            | 406.08           | 486.85         | 1.44           | 0.025     |
| 217099_s_at | GEMIN4   | gem (nuclear organelle) associated protein 4               | 50628  | Hs.499620            | 140.69           | 128.37         | -1.20          | 0.025     |
| 207243_s_at | CALM2    | calmodulin 2 (phosphorylase kinase, delta)                 | 805    | Hs.282410, Hs.643483 | 3220.25          | 3547.64        | 1.21           | 0.025     |
| 211011_at   | COL19A1  | collagen, type XIX, alpha 1                                | 1310   | Hs.444842            | 29.06            | 27.02          | -1.16          | 0.025     |
| 214636_at   | CALCB    | calcitonin-related polypeptide, beta                       | 797    | Hs.534305            | 20.84            | 19.48          | -1.14          | 0.025     |
| 222099_s_at | LSM14A   | LSM14A, SCD6 homolog A (S. cerevisiae)                     | 26065  | Hs.407368            | 198.53           | 218.99         | 1.22           | 0.025     |
| 215463_at   | OR7E24   | olfactory receptor, family 7, subfamily E, member 24       | 26648  | Hs.129832            | 25.96            | 23.61          | -1.21          | 0.026     |
| 218011_at   | UBL5     | ubiquitin-like 5                                           | 59286  | Hs.534477            | 362.52           | 430.57         | 1.41           | 0.026     |
| 200912_s_at | EIF4A2   | eukaryotic translation initiation factor 4A, isoform 2     | 1974   | Hs.599481, Hs.654367 | 2002.45          | 2281.28        | 1.30           | 0.026     |
| 221398_at   | TAS2R8   | taste receptor, type 2, member 8                           | 50836  | Hs.533755            | 28.58            | 25.43          | -1.26          | 0.026     |
| 219688_at   | BBS7     | Bardet-Biedl syndrome 7                                    | 55212  | Hs.591694            | 11.72            | 11.17          | -1.10          | 0.026     |
| 201272_at   | AKR1B1   | aldo-keto reductase family 1, member B1 (aldose reductase) | 231    | Hs.521212            | 988.72           | 1133.55        | 1.31           | 0.026     |
| 203413_at   | NELL2    | NEL-like 2 (chicken)                                       | 4753   | Hs.505326            | 57.93            | 51.91          | -1.25          | 0.026     |
| 220752_at   | LOC51145 | erythrocyte transmembrane protein                          | 51145  | Hs.104671            | 19.90            | 18.03          | -1.22          | 0.026     |
| 215048_at   | SUHW2    | suppressor of hairy wing homolog 2 (Drosophila)            | 140883 | Hs.43834             | 43.48            | 40.28          | -1.17          | 0.026     |
| 217033_x_at | NTRK3    | neurotrophic tyrosine kinase, receptor, type 3             | 4916   | Hs.410969, Hs.680479 | 238.53           | 213.65         | -1.25          | 0.026     |
| 220466_at   | CCDC15   | coiled-coil domain containing 15                           | 80071  | Hs.287555            | 61.00            | 55.60          | -1.20          | 0.026     |
| 221241_s_at | BCL2L14  | BCL2-like 14 (apoptosis facilitator)                       | 79370  | Hs.210343            | 131.52           | 118.09         | -1.24          | 0.026     |

| Probe       | Symbol  | Description                                                                     | Gene  | UniGene   | Av Exp Female | Av Exp Male | Fold Change | adj P val |
|-------------|---------|---------------------------------------------------------------------------------|-------|-----------|---------------|-------------|-------------|-----------|
| 201405_s_at | COPS6   | COP9 constitutive photomorphogenic homolog subunit 6 (Arabidopsis)              | 10980 | Hs.15591  | 378.39        | 421.29      | 1.24        | 0.026     |
| 215020_at   | NRXN3   | neurexin 3                                                                      | 9369  | Hs.368307 | 66.07         | 59.57       | -1.23       | 0.026     |
| 209173_at   | AGR2    | anterior gradient homolog 2 (Xenopus laevis)                                    | 10551 | Hs.530009 | 34.14         | 31.47       | -1.18       | 0.026     |
| 215652_at   |         |                                                                                 | 84346 |           | 28.74         | 26.31       | -1.19       | 0.026     |
| 220135_s_at | SLC7A9  | solute carrier family 7 (cationic amino acid transporter, y+ system), member 9  | 11136 | Hs.408567 | 75.21         | 67.65       | -1.24       | 0.026     |
| 205515_at   | PRSS12  | protease, serine, 12 (neurotrypsin, motopsin)                                   | 8492  | Hs.654823 | 23.25         | 20.86       | -1.24       | 0.026     |
| 221198_at   | SCT     | secretin                                                                        | 6343  | Hs.632324 | 20.63         | 23.73       | 1.32        | 0.026     |
| 216288_at   | CYSLTR1 | cysteinyl leukotriene receptor 1                                                | 10800 | Hs.201300 | 12.38         | 11.81       | -1.10       | 0.026     |
| 220338_at   | RALGPS2 | Ral GEF with PH domain and SH3 binding motif 2                                  | 55103 | Hs.644008 | 11.46         | 10.95       | -1.09       | 0.026     |
| 221438_s_at | TEX12   | testis expressed 12                                                             | 56158 | Hs.524039 | 12.79         | 12.24       | -1.09       | 0.026     |
| 202885_s_at | PPP2R1B | protein phosphatase 2 (formerly 2A), regulatory subunit A, beta isoform         | 5519  | Hs.584790 | 77.11         | 70.74       | -1.19       | 0.026     |
| 206777_s_at | CRYBB2  | crystallin, beta B2                                                             | 1415  | Hs.373074 | 88.64         | 75.15       | -1.39       | 0.026     |
| 211297_s_at | CDK7    | cyclin-dependent kinase 7 (MO15 homolog, Xenopus laevis, cdk-activating kinase) | 1022  | Hs.184298 | 41.94         | 49.32       | 1.38        | 0.026     |
| 219510_at   | POLQ    | polymerase (DNA directed), theta                                                | 10721 | Hs.241517 | 63.74         | 57.37       | -1.23       | 0.026     |
| 209942_x_at | MAGEA3  | melanoma antigen family A, 3                                                    | 4102  | Hs.417816 | 31.28         | 28.89       | -1.17       | 0.026     |
| 213622_at   | COL9A2  | collagen, type IX, alpha 2                                                      | 1298  | Hs.418012 | 65.32         | 59.66       | -1.20       | 0.026     |
| 213407_at   | PHLPL   | PH domain and leucine rich repeat protein phosphatase-like                      | 23035 | Hs.531564 | 90.78         | 82.54       | -1.21       | 0.026     |
| 217962_at   | NOLA3   | nucleolar protein family A, member 3 (H/ACA small nucleolar RNPs)               | 55505 | Hs.14317  | 563.28        | 642.28      | 1.30        | 0.026     |
| 204818_at   | HSD17B2 | hydroxysteroid (17-beta) dehydrogenase 2                                        | 3294  | Hs.162795 | 31.93         | 29.06       | -1.21       | 0.026     |
| 205988_at   | CD84    | CD84 molecule                                                                   | 8832  | Hs.398093 | 124.09        | 108.19      | -1.32       | 0.026     |
| 211682_x_at | UGT2B28 | UDP glucuronosyltransferase 2 family, polypeptide B28                           | 54490 | Hs.653154 | 62.19         | 55.99       | -1.23       | 0.026     |

| Probe       | Symbol   | Description                                                   | Gene   | UniGene                         | Av Exp Female | Av Exp Male | Fold Change | adj P val |
|-------------|----------|---------------------------------------------------------------|--------|---------------------------------|---------------|-------------|-------------|-----------|
| 220435_at   | SLC30A10 | solute carrier family 30, member 10                           | 55532  | Hs.284450, Hs.679909            | 16.69         | 15.32       | -1.19       | 0.026     |
| 206123_at   | LLGL1    | lethal giant larvae homolog 1 (Drosophila)                    | 3996   | Hs.513983                       | 325.31        | 291.06      | -1.25       | 0.026     |
| 201135_at   | ECHS1    | enoyl Coenzyme A hydratase, short chain, 1, mitochondrial     | 1892   | Hs.76394                        | 897.76        | 1026.75     | 1.31        | 0.026     |
| 205675_at   | MTTP     | microsomal triglyceride transfer protein                      | 4547   | Hs.195799                       | 27.55         | 25.51       | -1.17       | 0.026     |
| 208785_s_at | KRTHB5   | keratin, hair, basic, 5                                       | 643246 | Hs.506947                       | 330.92        | 386.78      | 1.37        | 0.026     |
| 217640_x_at | C18orf24 | chromosome 18 open reading frame 24                           | 220134 | Hs.134726                       | 12.25         | 11.56       | -1.12       | 0.026     |
| 214612_x_at | MAGEA6   | melanoma antigen family A, 6                                  | 4105   | Hs.441113                       | 15.70         | 14.71       | -1.14       | 0.026     |
| 204798_at   | MYB      | v-myb myeloblastosis viral oncogene homolog (avian)           | 4602   | Hs.654446                       | 23.23         | 21.27       | -1.19       | 0.026     |
| 221084_at   | HTR3B    | 5-hydroxytryptamine (serotonin) receptor 3B                   | 9177   | Hs.241377                       | 68.56         | 62.40       | -1.21       | 0.026     |
| 200063_s_at | NPM1     | nucleophosmin (nucleolar phosphoprotein B23, numatrin)        | 4869   | Hs.557550                       | 980.23        | 1119.79     | 1.31        | 0.026     |
| 207049_at   | SCN8A    | sodium channel, voltage gated, type VIII, alpha subunit       | 6334   | Hs.436550                       | 45.39         | 41.12       | -1.22       | 0.026     |
| 206681_x_at | GP2      | glycoprotein 2 (zymogen granule membrane)                     | 2813   | Hs.53985                        | 153.03        | 138.48      | -1.22       | 0.026     |
| 214938_x_at | HMGB1    | high-mobility group box 1                                     | 3146   | Hs.434102, Hs.593339, Hs.644368 | 1545.61       | 1745.90     | 1.28        | 0.026     |
| 206851_at   | RNASE3   | ribonuclease, RNase A family, 3 (eosinophil cationic protein) | 6037   | Hs.73839                        | 82.73         | 75.72       | -1.19       | 0.026     |
| 209715_at   | CBX5     | chromobox homolog 5 (HP1 alpha homolog, Drosophila)           | 23468  | Hs.632724                       | 66.52         | 74.88       | 1.27        | 0.026     |
| 220313_at   | GPR88    | G protein-coupled receptor 88                                 | 54112  | Hs.170053                       | 14.19         | 13.38       | -1.12       | 0.026     |
| 214569_at   | IFNA5    | interferon, alpha 5                                           | 3442   | Hs.37113                        | 18.64         | 17.08       | -1.19       | 0.026     |
| 211870_s_at | PCDHA3   | protocadherin alpha 3                                         | 56145  | Hs.199343                       | 82.69         | 73.99       | -1.25       | 0.026     |
| 219509_at   | MYOZ1    | myozenin 1                                                    | 58529  | Hs.238756                       | 164.64        | 145.39      | -1.28       | 0.026     |
| 209338_at   | TFCP2    | transcription factor CP2                                      | 7024   | Hs.48849                        | 150.46        | 165.83      | 1.21        | 0.026     |
| 220621_at   | FOXE3    | forkhead box E3                                               | 2301   | Hs.112968                       | 32.86         | 30.67       | -1.15       | 0.026     |
| 220759_at   | FAM12B   | family with sequence similarity 12, member B (epididymal)     | 64184  | Hs.525202                       | 19.25         | 17.80       | -1.17       | 0.026     |
| 220374_at   | KLHL28   | kelch-like 28 (Drosophila)                                    | 54813  | Hs.653206                       | 62.96         | 58.13       | -1.17       | 0.026     |

| Probe       | Symbol   | Description                                                                | Gene   | UniGene              | Av Exp Female | Av Exp Male | Fold Change | adj P val |
|-------------|----------|----------------------------------------------------------------------------|--------|----------------------|---------------|-------------|-------------|-----------|
| 212416_at   | SCAMP1   | secretory carrier membrane protein 1                                       | 9522   | Hs.482587            | 185.66        | 211.17      | 1.29        | 0.026     |
| 203152_at   | MRPL40   | mitochondrial ribosomal protein L40                                        | 64976  | Hs.431307            | 274.66        | 313.91      | 1.31        | 0.026     |
| 212862_at   | CDS2     | CDP-diacylglycerol synthase (phosphatidate cytidyltransferase) 2           | 8760   | Hs.472027            | 213.10        | 244.54      | 1.32        | 0.026     |
| 215932_at   | MAGEC2   | melanoma antigen family C, 2                                               | 51438  | Hs.123536            | 64.96         | 57.79       | -1.26       | 0.026     |
| 219244_s_at | MRPL46   | mitochondrial ribosomal protein L46                                        | 26589  | Hs.534261            | 302.52        | 345.80      | 1.31        | 0.027     |
| 216038_x_at | DAXX     | death-associated protein 6                                                 | 1616   | Hs.336916            | 119.60        | 108.98      | -1.20       | 0.027     |
| 213323_s_at | ZC3H7B   | zinc finger CCCH-type containing 7B                                        | 23264  | Hs.592188            | 138.92        | 126.07      | -1.21       | 0.027     |
| 200663_at   | CD63     | CD63 molecule                                                              | 967    | Hs.445570            | 2196.63       | 2430.90     | 1.22        | 0.027     |
| 213744_at   | ATRNL1   | attractin-like 1                                                           | 26033  | Hs.501127, Hs.648490 | 37.88         | 34.53       | -1.20       | 0.027     |
| 202849_x_at | GRK6     | G protein-coupled receptor kinase 6                                        | 2870   | Hs.235116            | 232.17        | 212.64      | -1.19       | 0.027     |
| 206291_at   | NTS      | neurotensin                                                                | 4922   | Hs.80962             | 33.64         | 30.74       | -1.20       | 0.027     |
| 210633_x_at | KRT10    | keratin 10 (epidermolytic hyperkeratosis; keratosis palmaris et plantaris) | 3858   | Hs.99936             | 304.66        | 343.47      | 1.27        | 0.027     |
| 207188_at   | CDK3     | cyclin-dependent kinase 3                                                  | 1018   | Hs.593566            | 70.87         | 64.28       | -1.22       | 0.027     |
| 207356_at   | DEFB4    | defensin, beta 4                                                           | 1673   | Hs.105924            | 111.82        | 100.47      | -1.24       | 0.027     |
| 221189_s_at | TARS2    | threonyl-tRNA synthetase 2, mitochondrial (putative)                       | 80222  | Hs.288974            | 137.93        | 152.22      | 1.22        | 0.027     |
| 221052_at   | TDRKH    | tudor and KH domain containing                                             | 11022  | Hs.144439            | 46.52         | 40.05       | -1.35       | 0.027     |
| 208081_s_at | ZNF442   | zinc finger protein 442                                                    | 79973  | Hs.253193            | 16.92         | 15.55       | -1.18       | 0.027     |
| 201425_at   | ALDH2    | aldehyde dehydrogenase 2 family (mitochondrial)                            | 217    | Hs.632733            | 865.86        | 986.18      | 1.30        | 0.027     |
| 207612_at   | WNT8B    | wingless-type MMTV integration site family, member 8B                      | 7479   | Hs.421281            | 89.76         | 80.24       | -1.25       | 0.027     |
| 212961_x_at | CXorf40B | chromosome X open reading frame 40B                                        | 541578 | Hs.545950            | 186.96        | 212.51      | 1.29        | 0.027     |
| 213889_at   | PIGL     | phosphatidylinositol glycan anchor biosynthesis, class L                   | 9487   | Hs.499793, Hs.625050 | 111.63        | 103.92      | -1.15       | 0.027     |
| 221282_x_at | RUNX2    | runt-related transcription factor 2                                        | 860    | Hs.535845            | 89.06         | 80.32       | -1.23       | 0.027     |
| 208950_s_at | ALDH7A1  | aldehyde dehydrogenase 7                                                   | 501    | Hs.483239            | 116.10        | 133.77      | 1.33        | 0.027     |

| Probe       | Symbol   | Description                                                             | Gene  | UniGene              | Av Exp Female | Av Exp Male | Fold Change | adj P val |
|-------------|----------|-------------------------------------------------------------------------|-------|----------------------|---------------|-------------|-------------|-----------|
|             |          | family, member A1                                                       |       |                      |               |             |             |           |
| 218332_at   | BEX1     | brain expressed, X-linked 1                                             | 55859 | Hs.334370            | 174.73        | 239.52      | 1.88        | 0.027     |
| 209536_s_at | EHD4     | EH-domain containing 4                                                  | 30844 | Hs.143703            | 365.87        | 421.50      | 1.33        | 0.027     |
| 204105_s_at | NRCAM    | neuronal cell adhesion molecule                                         | 4897  | Hs.21422             | 37.95         | 34.96       | -1.18       | 0.027     |
| 200896_x_at | HDGF     | hepatoma-derived growth factor (high-mobility group protein 1-like)     | 3068  | Hs.506748            | 590.16        | 644.53      | 1.19        | 0.027     |
| 215837_x_at | PRO1621  | PRO1621 protein                                                         | 29007 | Hs.632107            | 18.43         | 16.91       | -1.19       | 0.027     |
| 204424_s_at | LMO3     | LIM domain only 3 (rhombotin-like 2)                                    | 55885 | Hs.504908            | 129.20        | 111.91      | -1.33       | 0.027     |
| 217780_at   | C19orf56 | chromosome 19 open reading frame 56                                     | 51398 | Hs.108969            | 533.15        | 607.36      | 1.30        | 0.027     |
| 206034_at   | SERPINB8 | serpin peptidase inhibitor, clade B (ovalbumin), member 8               | 5271  | Hs.368077            | 61.77         | 55.11       | -1.26       | 0.027     |
| 213780_at   | TCHH     | trichohyalin                                                            | 7062  | Hs.553300            | 20.02         | 18.35       | -1.19       | 0.027     |
| 206000_at   | MEP1A    | meprin A, alpha (PABA peptide hydrolase)                                | 4224  | Hs.179704            | 30.12         | 27.11       | -1.23       | 0.027     |
| 218115_at   | ASF1B    | ASF1 anti-silencing function 1 homolog B ( <i>S. cerevisiae</i> )       | 55723 | Hs.26516             | 131.51        | 118.80      | -1.23       | 0.027     |
| 208842_s_at | GORASP2  | golgi reassembly stacking protein 2, 55kDa                              | 26003 | Hs.431317            | 261.80        | 294.91      | 1.27        | 0.027     |
| 214530_x_at | EPB41    | erythrocyte membrane protein band 4.1 (elliptocytosis 1, RH-linked)     | 2035  | Hs.175437, Hs.695416 | 53.92         | 48.36       | -1.24       | 0.027     |
| 203961_at   | NEBL     | nebullette                                                              | 10529 | Hs.5025              | 3077.39       | 3502.78     | 1.30        | 0.027     |
| 209004_s_at | FBXL5    | F-box and leucine-rich repeat protein 5                                 | 26234 | Hs.643433            | 171.27        | 218.09      | 1.62        | 0.027     |
| 206876_at   | SIM1     | single-minded homolog 1 ( <i>Drosophila</i> )                           | 6492  | Hs.520293            | 17.01         | 15.56       | -1.20       | 0.027     |
| 220458_at   | FLJ10246 | FLJ10246                                                                | 55104 | Hs.660687            | 33.57         | 31.07       | -1.17       | 0.027     |
| 214893_x_at | HCN2     | hyperpolarization activated cyclic nucleotide-gated potassium channel 2 | 610   | Hs.124161            | 56.29         | 63.85       | 1.29        | 0.027     |
| 37831_at    | SIPA1L3  | signal-induced proliferation-associated 1 like 3                        | 23094 | Hs.655502            | 128.07        | 117.34      | -1.19       | 0.027     |
| 202779_s_at | UBE2S    | ubiquitin-conjugating enzyme E2S                                        | 27338 | Hs.396393, Hs.592114 | 82.55         | 96.52       | 1.37        | 0.027     |
| 202383_at   | JARID1C  | jumonji, AT rich interactive domain 1C                                  | 8242  | Hs.631768            | 251.90        | 225.50      | -1.25       | 0.027     |
| 221370_at   | ZNF73    | zinc finger protein 73                                                  | 7624  |                      | 47.33         | 42.70       | -1.23       | 0.027     |
| 219545_at   | KCTD14   | potassium channel                                                       | 65987 | Hs.407860            | 98.71         | 89.15       | -1.23       | 0.027     |

| Probe       | Symbol    | Description                                                                  | Gene   | UniGene              | Av Exp Female | Av Exp Male | Fold Change | adj P val |
|-------------|-----------|------------------------------------------------------------------------------|--------|----------------------|---------------|-------------|-------------|-----------|
|             |           | tetramerisation domain containing 14                                         |        |                      |               |             |             |           |
| 215312_at   | LOC644776 | similar to DNA repair protein RAD52 homolog                                  | 644776 | Hs.179697            | 11.52         | 11.00       | -1.10       | 0.027     |
| 202209_at   | LSM3      | LSM3 homolog, U6 small nuclear RNA associated (S. cerevisiae)                | 27258  | Hs.111632            | 479.85        | 546.21      | 1.30        | 0.027     |
| 205175_s_at | KHK       | ketoheokinase (fructokinase)                                                 | 3795   | Hs.159525, Hs.567297 | 76.38         | 68.12       | -1.26       | 0.028     |
| 214234_s_at | CYP3A5P2  | cytochrome P450, family 3, subfamily A, polypeptide 5 pseudogene 2           | 79424  | Hs.150276            | 36.80         | 32.12       | -1.31       | 0.028     |
| 209139_s_at | PRKRA     | protein kinase, interferon-inducible double stranded RNA dependent activator | 8575   | Hs.632540            | 149.01        | 180.04      | 1.46        | 0.028     |
| 203914_x_at | HPGD      | hydroxyprostaglandin dehydrogenase 15- (NAD)                                 | 3248   | Hs.655491            | 37.71         | 33.80       | -1.24       | 0.028     |
| 217046_s_at | AGER      | advanced glycosylation end product-specific receptor                         | 177    | Hs.693583            | 45.55         | 52.32       | 1.32        | 0.028     |
| 214953_s_at | APP       | amyloid beta (A4) precursor protein (peptidase nexin-II, Alzheimer disease)  | 351    | Hs.434980            | 330.60        | 464.19      | 1.97        | 0.028     |
| 214648_at   | GPX5      | glutathione peroxidase 5 (epididymal androgen-related protein)               | 2880   | Hs.248129            | 33.43         | 30.47       | -1.20       | 0.028     |
| 200043_at   | ERH       | enhancer of rudimentary homolog (Drosophila)                                 | 2079   | Hs.509791            | 697.97        | 779.27      | 1.25        | 0.028     |
| 214082_at   | CA5B      | carbonic anhydrase VB, mitochondrial                                         | 11238  | Hs.653287            | 76.40         | 70.01       | -1.19       | 0.028     |
| 208349_at   | TRPA1     | transient receptor potential cation channel, subfamily A, member 1           | 8989   | Hs.667156            | 60.61         | 55.98       | -1.17       | 0.028     |
| 205939_at   | CYP3A7    | cytochrome P450, family 3, subfamily A, polypeptide 7                        | 1551   | Hs.111944            | 47.23         | 43.40       | -1.18       | 0.028     |
| 220167_s_at | TP53TG3   | TP53TG3 protein                                                              | 24150  | Hs.592038            | 143.58        | 127.89      | -1.26       | 0.028     |
| 206731_at   | CNKSR2    | connector enhancer of kinase suppressor of Ras 2                             | 22866  | Hs.632794            | 15.00         | 14.16       | -1.12       | 0.028     |
| 216404_at   | ATXN8OS   | ataxin 8 opposite strand                                                     | 6315   | Hs.676453            | 119.36        | 109.30      | -1.19       | 0.028     |
| 214529_at   | TSHB      | thyroid stimulating                                                          | 7252   | Hs.406687            | 64.63         | 59.31       | -1.19       | 0.028     |

| Probe       | Symbol    | Description                                                                                                      | Gene   | UniGene              | Av Exp Female | Av Exp Male | Fold Change | adj P val |
|-------------|-----------|------------------------------------------------------------------------------------------------------------------|--------|----------------------|---------------|-------------|-------------|-----------|
|             |           | hormone, beta                                                                                                    |        |                      |               |             |             |           |
| 204951_at   | RHOH      | ras homolog gene family, member H                                                                                | 399    | Hs.654594, Hs.694951 | 107.92        | 95.15       | -1.29       | 0.028     |
| 219575_s_at | PDF       | peptide deformylase (mitochondrial)                                                                              | 64146  | Hs.693727            | 57.32         | 64.35       | 1.26        | 0.028     |
| 201092_at   | RBBP7     | retinoblastoma binding protein 7                                                                                 | 5931   | Hs.495755            | 459.31        | 524.11      | 1.30        | 0.028     |
| 217170_at   | TRA@      | T cell receptor alpha locus                                                                                      | 6955   | Hs.74647             | 180.56        | 160.96      | -1.26       | 0.028     |
| 206231_at   | KCNN1     | potassium intermediate/small conductance calcium-activated channel, subfamily N, member 1                        | 3780   | Hs.158173            | 210.95        | 192.61      | -1.20       | 0.028     |
| 220701_at   |           |                                                                                                                  | 55451  |                      | 58.55         | 51.38       | -1.30       | 0.028     |
| 210657_s_at | 4-Sep     | septin 4                                                                                                         | 5414   | Hs.287518            | 60.93         | 69.54       | 1.30        | 0.028     |
| 219270_at   | CHAC1     | ChaC, cation transport regulator homolog 1 (E. coli)                                                             | 79094  | Hs.155569            | 120.26        | 108.76      | -1.22       | 0.028     |
| 220048_at   | EDAR      | ectodysplasin A receptor                                                                                         | 10913  | Hs.171971            | 54.01         | 49.03       | -1.21       | 0.028     |
| 219259_at   | SEMA4A    | sema domain, immunoglobulin domain (Ig), transmembrane domain (TM) and short cytoplasmic domain, (semaphorin) 4A | 64218  | Hs.408846            | 267.48        | 242.59      | -1.22       | 0.028     |
| 221511_x_at | CCPG1     | cell cycle progression 1                                                                                         | 9236   | Hs.612814            | 397.08        | 458.97      | 1.34        | 0.028     |
| 214905_at   | LOC145899 | hypothetical protein LOC145899                                                                                   | 145899 | Hs.459035            | 42.65         | 39.03       | -1.19       | 0.028     |
| 210004_at   | OLR1      | oxidized low density lipoprotein (lectin-like) receptor 1                                                        | 4973   | Hs.412484            | 16.15         | 15.25       | -1.12       | 0.028     |
| 203408_s_at | SATB1     | SATB homeobox 1                                                                                                  | 6304   | Hs.517717            | 256.61        | 299.77      | 1.36        | 0.028     |
| 216080_s_at | FADS3     | fatty acid desaturase 3                                                                                          | 3995   | Hs.21765             | 138.79        | 169.94      | 1.50        | 0.028     |
| 201767_s_at | ELAC2     | elaC homolog 2 (E. coli)                                                                                         | 60528  | Hs.434232            | 95.36         | 110.19      | 1.34        | 0.029     |
| 222220_s_at | TSNAXIP1  | translin-associated factor X interacting protein 1                                                               | 55815  | Hs.632212            | 91.33         | 81.25       | -1.26       | 0.029     |
| 200059_s_at | RHOA      | ras homolog gene family, member A                                                                                | 387    | Hs.247077            | 961.78        | 1129.65     | 1.38        | 0.029     |
| 205776_at   | FMO5      | flavin containing monooxygenase 5                                                                                | 2330   | Hs.642706            | 34.60         | 31.52       | -1.21       | 0.029     |
| 219915_s_at | SLC16A10  | solute carrier family 16, member 10 (aromatic amino acid transporter)                                            | 117247 | Hs.591327            | 58.65         | 55.25       | -1.13       | 0.029     |
| 220056_at   | IL22RA1   | interleukin 22 receptor, alpha 1                                                                                 | 58985  | Hs.110915            | 38.26         | 34.86       | -1.20       | 0.029     |
| 215593_at   | GCNT2     | glucosaminyl (N-acetyl) transferase 2, I-                                                                        | 2651   | Hs.519884            | 160.84        | 148.16      | -1.18       | 0.029     |

| Probe       | Symbol  | Description                                                                       | Gene   | UniGene                 | Av Exp Female | Av Exp Male | Fold Change | adj P val |
|-------------|---------|-----------------------------------------------------------------------------------|--------|-------------------------|---------------|-------------|-------------|-----------|
| 201706_s_at | PEX19   | branching enzyme (I blood group)<br>peroxisomal biogenesis factor 19              | 5824   | Hs.517232               | 239.38        | 270.50      | 1.28        | 0.029     |
| 211338_at   | IFNA2   | interferon, alpha 2                                                               | 3440   | Hs.211575               | 14.60         | 13.70       | -1.13       | 0.029     |
| 214158_s_at | FABP1   | fatty acid binding protein 1, liver                                               | 2168   | Hs.380135               | 44.40         | 40.54       | -1.20       | 0.029     |
| 212886_at   | CCDC69  | coiled-coil domain containing 69                                                  | 26112  | Hs.655336               | 112.33        | 136.32      | 1.47        | 0.029     |
| 202164_s_at | CNOT8   | CCR4-NOT transcription complex, subunit 8                                         | 9337   | Hs.26703                | 76.51         | 93.01       | 1.48        | 0.029     |
| 214758_at   | WDR21A  | WD repeat domain 21A                                                              | 26094  | Hs.331491               | 44.12         | 40.63       | -1.18       | 0.029     |
| 211767_at   | GINS4   | GINS complex subunit 4 (Sld5 homolog)                                             | 84296  | Hs.656996               | 26.30         | 24.31       | -1.17       | 0.029     |
| 205602_x_at | PSG7    | pregnancy specific beta-1-glycoprotein 7                                          | 5676   | Hs.654467               | 91.57         | 82.57       | -1.23       | 0.029     |
| 206256_at   | CPN1    | carboxypeptidase N, polypeptide 1                                                 | 1369   | Hs.2246                 | 62.63         | 56.52       | -1.23       | 0.029     |
| 201519_at   | TOMM70A | translocase of outer mitochondrial membrane 70 homolog A ( <i>S. cerevisiae</i> ) | 9868   | Hs.227253               | 379.57        | 438.24      | 1.33        | 0.029     |
| 206376_at   | SLC6A15 | solute carrier family 6, member 15                                                | 55117  | Hs.44424                | 23.86         | 22.05       | -1.17       | 0.029     |
| 222153_at   | MYEF2   | myelin expression factor 2                                                        | 50804  | Hs.6638                 | 12.50         | 11.82       | -1.12       | 0.029     |
| 211289_x_at | CDC2L2  | cell division cycle 2-like 2 (PITSLRE proteins)                                   | 728642 | Hs.651228,<br>Hs.654369 | 117.86        | 133.66      | 1.29        | 0.029     |
| 213553_x_at | APOC1   | apolipoprotein C-I                                                                | 341    | Hs.110675               | 220.96        | 200.38      | -1.22       | 0.029     |
| 206058_at   | SLC6A12 | solute carrier family 6 (neurotransmitter transporter, betaine/GABA), member 12   | 6539   | Hs.437174               | 64.38         | 58.27       | -1.22       | 0.029     |
| 207043_s_at | SLC6A9  | solute carrier family 6 (neurotransmitter transporter, glycine), member 9         | 6536   | Hs.442590               | 32.50         | 29.91       | -1.18       | 0.029     |
| 211979_at   | GPR107  | G protein-coupled receptor 107                                                    | 57720  | Hs.512461               | 195.16        | 220.11      | 1.27        | 0.029     |
| 206760_s_at | FCER2   | Fc fragment of IgE, low affinity II, receptor for (CD23)                          | 2208   | Hs.465778               | 57.14         | 50.37       | -1.29       | 0.029     |
| 207538_at   | IL4     | interleukin 4                                                                     | 3565   | Hs.73917                | 16.81         | 15.67       | -1.15       | 0.029     |
| 219275_at   | PDCD5   | programmed cell death 5                                                           | 9141   | Hs.443831               | 96.78         | 114.93      | 1.41        | 0.029     |
| 221392_at   | TAS2R4  | taste receptor, type 2, member 4                                                  | 50832  | Hs.669863               | 32.24         | 28.76       | -1.26       | 0.029     |
| 210925_at   | CIITA   | class II, major histocompatibility complex, transactivator                        | 4261   | Hs.126714               | 176.11        | 161.14      | -1.19       | 0.029     |



| Probe       | Symbol   | Description                                                                     | Gene  | UniGene              | Av Exp Female | Av Exp Male | Fold Change | adj P val |
|-------------|----------|---------------------------------------------------------------------------------|-------|----------------------|---------------|-------------|-------------|-----------|
| 218176_at   | MAGEF1   | melanoma antigen family F, 1                                                    | 64110 | Hs.306123            | 116.74        | 128.60      | 1.21        | 0.029     |
| 206377_at   | FOXF2    | forkhead box F2                                                                 | 2295  | Hs.484423            | 32.89         | 29.83       | -1.22       | 0.029     |
| 220740_s_at | SLC12A6  | solute carrier family 12 (potassium/chloride transporters), member 6            | 9990  | Hs.510939            | 47.58         | 42.66       | -1.24       | 0.030     |
| 221464_at   | OR1D2    | olfactory receptor, family 1, subfamily D, member 2                             | 4991  | Hs.532771            | 137.29        | 123.51      | -1.24       | 0.030     |
| 202568_s_at | MARK3    | MAP/microtubule affinity-regulating kinase 3                                    | 4140  | Hs.35828             | 154.97        | 171.59      | 1.23        | 0.030     |
| 209177_at   | C3orf60  | chromosome 3 open reading frame 60                                              | 25915 | Hs.31387             | 406.26        | 472.08      | 1.35        | 0.030     |
| 205088_at   | CXorf6   | chromosome X open reading frame 6                                               | 10046 | Hs.20136             | 89.42         | 79.25       | -1.27       | 0.030     |
| 210064_s_at | UPK1B    | uroplakin 1B                                                                    | 7348  | Hs.271580            | 49.90         | 45.64       | -1.20       | 0.030     |
| 221113_s_at | WNT16    | wingless-type MMTV integration site family, member 16                           | 51384 | Hs.272375            | 38.79         | 35.21       | -1.21       | 0.030     |
| 201593_s_at | ZC3H15   | zinc finger CCCH-type containing 15                                             | 55854 | Hs.368598            | 137.74        | 192.42      | 1.95        | 0.030     |
| 204765_at   | ARHGEF5  | Rho guanine nucleotide exchange factor (GEF) 5                                  | 7984  | Hs.334,<br>Hs.534621 | 137.26        | 125.29      | -1.20       | 0.030     |
| 205287_s_at | TFAP2C   | transcription factor AP-2 gamma (activating enhancer binding protein 2 gamma)   | 7022  | Hs.473152            | 37.34         | 33.88       | -1.21       | 0.030     |
| 201871_s_at | LOC51035 | SAPK substrate protein 1                                                        | 51035 | Hs.351296            | 188.72        | 206.12      | 1.19        | 0.030     |
| 205243_at   | SLC13A3  | solute carrier family 13 (sodium-dependent dicarboxylate transporter), member 3 | 64849 | Hs.655498            | 118.20        | 106.83      | -1.22       | 0.030     |
| 203371_s_at | NDUFB3   | NADH dehydrogenase (ubiquinone) 1 beta subcomplex, 3, 12kDa                     | 4709  | Hs.109760            | 1306.44       | 1485.06     | 1.29        | 0.030     |
| 206247_at   | MICB     | MHC class I polypeptide-related sequence B                                      | 4277  | Hs.211580            | 26.55         | 23.06       | -1.33       | 0.030     |
| 222199_s_at | BIN3     | bridging integrator 3                                                           | 55909 | Hs.654720            | 107.86        | 118.52      | 1.21        | 0.030     |
| 210533_at   | MSH4     | mutS homolog 4 (E. coli)                                                        | 4438  | Hs.216639            | 16.75         | 15.43       | -1.18       | 0.030     |
| 206588_at   | DAZL     | deleted in azoospermia-like                                                     | 1618  | Hs.131179            | 17.94         | 16.98       | -1.12       | 0.030     |
| 204341_at   | TRIM16   | tripartite motif-containing 16                                                  | 10626 | Hs.123534            | 84.69         | 98.48       | 1.35        | 0.030     |
| 204444_at   | KIF11    | kinesin family member 11                                                        | 3832  | Hs.8878              | 15.06         | 14.06       | -1.15       | 0.030     |

| Probe       | Symbol   | Description                                                    | Gene  | UniGene              | Av Exp Female | Av Exp Male | Fold Change | adj P val |
|-------------|----------|----------------------------------------------------------------|-------|----------------------|---------------|-------------|-------------|-----------|
| 212380_at   | KIAA0082 | KIAA0082                                                       | 23070 | Hs.520102            | 133.95        | 149.84      | 1.25        | 0.030     |
| 201244_s_at | RAF1     | v-raf-1 murine leukemia viral oncogene homolog 1               | 5894  | Hs.159130            | 372.68        | 421.94      | 1.28        | 0.030     |
| 217095_x_at | NCR1     | natural cytotoxicity triggering receptor 1                     | 9437  | Hs.97084             | 135.52        | 122.59      | -1.22       | 0.030     |
| 218628_at   | CCDC53   | coiled-coil domain containing 53                               | 51019 | Hs.405692            | 186.44        | 219.34      | 1.38        | 0.030     |
| 214961_at   | KIAA0774 | KIAA0774                                                       | 23281 | Hs.22287             | 151.05        | 201.90      | 1.79        | 0.030     |
| 221119_at   | FLJ20184 | hypothetical protein FLJ20184                                  | 54848 | Hs.675420            | 129.36        | 114.39      | -1.28       | 0.030     |
| 220503_at   | SLC13A1  | solute carrier family 13 (sodium/sulfate symporters), member 1 | 6561  | Hs.489849            | 11.49         | 10.82       | -1.13       | 0.030     |
| 206390_x_at | PF4      | platelet factor 4 (chemokine (C-X-C motif) ligand 4)           | 5196  | Hs.81564             | 121.40        | 110.98      | -1.20       | 0.030     |
| 218810_at   | ZC3H12A  | zinc finger CCCH-type containing 12A                           | 80149 | Hs.656294            | 87.34         | 79.81       | -1.20       | 0.030     |
| 220373_at   | DCHS2    | dachsous 2 (Drosophila)                                        | 54798 | Hs.655664            | 98.71         | 90.40       | -1.19       | 0.030     |
| 201778_s_at | KIAA0494 | KIAA0494                                                       | 9813  | Hs.100874            | 558.88        | 627.95      | 1.26        | 0.030     |
| 209984_at   | JMJD2C   | jumonji domain containing 2C                                   | 23081 | Hs.157106            | 71.28         | 79.46       | 1.24        | 0.030     |
| 204469_at   | PTPRZ1   | protein tyrosine phosphatase, receptor-type, Z polypeptide 1   | 5803  | Hs.489824            | 12.86         | 12.20       | -1.11       | 0.030     |
| 220378_at   | TCP11    | t-complex 11 (mouse)                                           | 6954  | Hs.435371            | 63.61         | 59.34       | -1.15       | 0.030     |
| 221299_at   | GPR173   | G protein-coupled receptor 173                                 | 54328 | Hs.661815            | 41.72         | 37.79       | -1.22       | 0.030     |
| 215770_at   | OR7E2P   | olfactory receptor, family 7, subfamily E, member 2 pseudogene | 8587  |                      | 14.74         | 13.85       | -1.13       | 0.030     |
| 220275_at   | CUZD1    | CUB and zona pellucida-like domains 1                          | 50624 | Hs.647182            | 58.56         | 50.67       | -1.34       | 0.031     |
| 205240_at   | GPSM2    | G-protein signaling modulator 2 (AGS3-like, C. elegans)        | 29899 | Hs.584901            | 54.84         | 48.70       | -1.27       | 0.031     |
| 215172_at   | PTPN20B  | protein tyrosine phosphatase, non-receptor type 20B            | 26095 | Hs.440733, Hs.499552 | 15.28         | 16.67       | 1.19        | 0.031     |
| 213167_s_at | MRPS6    | mitochondrial ribosomal protein S6                             | 64968 | Hs.302742            | 20.67         | 19.18       | -1.16       | 0.031     |
| 207074_s_at | SLC18A1  | solute carrier family 18 (vesicular monoamine), member 1       | 6570  | Hs.158322            | 37.69         | 34.64       | -1.18       | 0.031     |
| 221337_s_at | ADAM29   | ADAM metallopeptidase domain 29                                | 11086 | Hs.126838            | 38.44         | 35.74       | -1.16       | 0.031     |
| 200615_s_at | AP2B1    | adaptor-related protein complex 2, beta 1 subunit              | 163   | Hs.514819            | 287.96        | 327.49      | 1.29        | 0.031     |

| Probe       | Symbol      | Description                                                                              | Gene   | UniGene              | Av Exp Female | Av Exp Male | Fold Change | adj P val |
|-------------|-------------|------------------------------------------------------------------------------------------|--------|----------------------|---------------|-------------|-------------|-----------|
| 210296_s_at | PXMP3       | peroxisomal membrane protein 3, 35kDa (Zellweger syndrome)                               | 5828   | Hs.437966            | 122.22        | 147.69      | 1.46        | 0.031     |
| 219885_at   | SLFN12      | schlafen family member 12                                                                | 55106  | Hs.663548            | 33.06         | 30.32       | -1.19       | 0.031     |
| 207218_at   | F9          | coagulation factor IX (plasma thromboplastic component, Christmas disease, hemophilia B) | 2158   | Hs.522798            | 23.73         | 21.97       | -1.17       | 0.031     |
| 203512_at   | TRAPPC3     | trafficking protein particle complex 3                                                   | 27095  | Hs.523131            | 189.75        | 205.86      | 1.18        | 0.031     |
| 205185_at   | SPINK5      | serine peptidase inhibitor, Kazal type 5                                                 | 11005  | Hs.331555            | 115.19        | 100.31      | -1.32       | 0.031     |
| 219735_s_at | TFCP2L1     | transcription factor CP2-like 1                                                          | 29842  | Hs.156471            | 143.77        | 128.57      | -1.25       | 0.031     |
| 217155_at   | RPL34P2     | ribosomal protein L34 pseudogene 2                                                       | 26513  |                      | 18.99         | 17.72       | -1.15       | 0.031     |
| 210055_at   | TSHR        | thyroid stimulating hormone receptor                                                     | 7253   | Hs.160411            | 21.73         | 20.07       | -1.17       | 0.031     |
| 206435_at   | B4GALNT1    | beta-1,4-N-acetyl-galactosaminyl transferase 1                                           | 2583   | Hs.591019            | 93.98         | 86.20       | -1.19       | 0.031     |
| 220509_at   |             |                                                                                          | 55469  |                      | 18.51         | 17.05       | -1.18       | 0.031     |
| 217043_s_at | MFN1        | mitofusin 1                                                                              | 55669  | Hs.478383            | 83.49         | 100.81      | 1.46        | 0.031     |
| 221171_at   | RP4-692D3.1 | hypothetical protein LOC728621                                                           | 728621 | Hs.473495            | 70.61         | 64.20       | -1.21       | 0.031     |
| 215161_at   | CAMK1G      | calcium/calmodulin-dependent protein kinase IG                                           | 57172  | Hs.199068            | 101.73        | 92.42       | -1.21       | 0.031     |
| 204191_at   | IFNAR1      | interferon (alpha, beta and omega) receptor 1                                            | 3454   | Hs.529400            | 60.66         | 54.67       | -1.23       | 0.032     |
| 200723_s_at | CAPRIN1     | cell cycle associated protein 1                                                          | 4076   | Hs.471818            | 210.39        | 252.92      | 1.45        | 0.032     |
| 210390_s_at | CCL15       | chemokine (C-C motif) ligand 15                                                          | 6359   | Hs.656286            | 16.13         | 15.17       | -1.13       | 0.032     |
| 210441_at   | CDC14A      | CDC14 cell division cycle 14 homolog A (S. cerevisiae)                                   | 8556   | Hs.127411            | 102.99        | 94.25       | -1.19       | 0.032     |
| 203430_at   | HEBP2       | heme binding protein 2                                                                   | 23593  | Hs.486589            | 527.16        | 614.10      | 1.36        | 0.032     |
| 218270_at   | MRPL24      | mitochondrial ribosomal protein L24                                                      | 79590  | Hs.418233            | 337.65        | 369.54      | 1.20        | 0.032     |
| 206745_at   | HOXC11      | homeobox C11                                                                             | 3227   | Hs.127562            | 177.22        | 160.79      | -1.21       | 0.032     |
| 207477_at   | PRO2958     | hypothetical protein PRO2958                                                             | 55414  |                      | 26.57         | 24.24       | -1.20       | 0.032     |
| 216579_at   | GJB4        | gap junction protein, beta 4                                                             | 127534 | Hs.351203, Hs.675868 | 163.33        | 144.87      | -1.27       | 0.032     |
| 214750_at   | PLAC4       | placenta-specific 4                                                                      | 191585 | Hs.472492            | 123.18        | 108.27      | -1.29       | 0.032     |
| 201078_at   | TM9SF2      | transmembrane 9 superfamily member 2                                                     | 9375   | Hs.654824            | 305.88        | 371.34      | 1.47        | 0.032     |
| 211245_x_at | KIR2DL4     | killer cell                                                                              | 3805   | Hs.651287,           | 68.94         | 62.34       | -1.22       | 0.032     |

| Probe       | Symbol    | Description                                                             | Gene   | UniGene   | Av Exp Female | Av Exp Male | Fold Change | adj P val |
|-------------|-----------|-------------------------------------------------------------------------|--------|-----------|---------------|-------------|-------------|-----------|
|             |           | immunoglobulin-like receptor, two domains, long cytoplasmic tail, 4     |        | Hs.661219 |               |             |             |           |
| 220537_at   | MTMR8     | myotubularin related protein 8                                          | 55613  | Hs.442892 | 25.73         | 23.14       | -1.24       | 0.032     |
| 219132_at   | PELI2     | pellino homolog 2 (Drosophila)                                          | 57161  | Hs.657926 | 66.29         | 60.85       | -1.19       | 0.032     |
| 205654_at   | C4BPA     | complement component 4 binding protein, alpha                           | 722    | Hs.1012   | 87.03         | 78.73       | -1.22       | 0.032     |
| 216354_at   | RPL12L2   | ribosomal protein L12-like 2                                            | 128467 |           | 31.89         | 29.53       | -1.17       | 0.032     |
| 210606_x_at | KLRD1     | killer cell lectin-like receptor subfamily D, member 1                  | 3824   | Hs.562457 | 49.22         | 44.76       | -1.21       | 0.032     |
| 215302_at   | LOC257152 | hypothetical protein LOC257152                                          | 257152 | Hs.663903 | 19.38         | 18.10       | -1.15       | 0.032     |
| 202958_at   | PTPN9     | protein tyrosine phosphatase, non-receptor type 9                       | 5780   | Hs.445775 | 225.27        | 209.27      | -1.16       | 0.032     |
| 205306_x_at | KMO       | kynurenine 3-monooxygenase (kynurenine 3-hydroxylase)                   | 8564   | Hs.409081 | 52.84         | 46.06       | -1.32       | 0.032     |
| 208156_x_at | EPPK1     | epiplakin 1                                                             | 83481  | Hs.200412 | 46.11         | 42.69       | -1.17       | 0.032     |
| 205643_s_at | PPP2R2B   | protein phosphatase 2 (formerly 2A), regulatory subunit B, beta isoform | 5521   | Hs.655213 | 162.98        | 144.84      | -1.27       | 0.032     |
| 214070_s_at | ATP10B    | ATPase, Class V, type 10B                                               | 23120  | Hs.109358 | 146.50        | 130.12      | -1.27       | 0.032     |
| 201561_s_at | CLSTN1    | calsyntenin 1                                                           | 22883  | Hs.29665  | 320.10        | 356.25      | 1.24        | 0.032     |
| 205084_at   | BCAP29    | B-cell receptor-associated protein 29                                   | 55973  | Hs.303787 | 56.50         | 67.74       | 1.44        | 0.032     |
| 217541_x_at | ZNF816A   | zinc finger protein 816A                                                | 125893 | Hs.655592 | 88.08         | 79.89       | -1.22       | 0.032     |
| 221164_x_at | CHST5     | carbohydrate (N-acetylglucosamine 6-O) sulfotransferase 5               | 23563  | Hs.156784 | 108.43        | 99.89       | -1.18       | 0.032     |
| 208818_s_at | COMT      | catechol-O-methyltransferase                                            | 1312   | Hs.370408 | 333.43        | 377.51      | 1.28        | 0.032     |
| 221458_at   | HTR1F     | 5-hydroxytryptamine (serotonin) receptor 1F                             | 3355   | Hs.248136 | 42.01         | 37.17       | -1.28       | 0.032     |
| 203515_s_at | PMVK      | phosphomevalonate kinase                                                | 10654  | Hs.30954  | 193.21        | 221.02      | 1.31        | 0.032     |
| 211755_s_at | ATP5F1    | ATP synthase, H+ transporting, mitochondrial F0 complex, subunit B1     | 515    | Hs.514870 | 2085.89       | 2349.24     | 1.27        | 0.032     |
| 207315_at   | CD226     | CD226 molecule                                                          | 10666  | Hs.660130 | 23.83         | 21.77       | -1.20       | 0.032     |
| 212010_s_at | CDV3      | CDV3 homolog (mouse)                                                    | 55573  | Hs.518265 | 191.87        | 227.35      | 1.40        | 0.032     |
| 213265_at   | PGA3      | pepsinogen 3, group I                                                   | 643834 | Hs.647247 | 72.47         | 64.22       | -1.27       | 0.032     |

| Probe       | Symbol   | Description                                                                      | Gene  | UniGene              | Av Exp Female | Av Exp Male | Fold Change | adj P val |
|-------------|----------|----------------------------------------------------------------------------------|-------|----------------------|---------------|-------------|-------------|-----------|
|             |          | (pepsinogen A)                                                                   |       |                      |               |             |             |           |
| 222230_s_at | ACTR10   | actin-related protein 10 homolog ( <i>S. cerevisiae</i> )                        | 55860 | Hs.509451            | 542.96        | 634.80      | 1.37        | 0.032     |
| 211848_s_at | CEACAM7  | carcinoembryonic antigen-related cell adhesion molecule 7                        | 1087  | Hs.74466             | 76.35         | 69.57       | -1.20       | 0.032     |
| 216063_at   | HBBP1    | hemoglobin, beta pseudogene 1                                                    | 3044  | Hs.20205             | 41.49         | 37.85       | -1.20       | 0.032     |
| 219557_s_at | NRIP3    | nuclear receptor interacting protein 3                                           | 56675 | Hs.523467            | 36.41         | 33.61       | -1.17       | 0.032     |
| 220504_at   | KERA     | keratocan                                                                        | 11081 | Hs.125750            | 13.00         | 12.31       | -1.12       | 0.032     |
| 220452_x_at |          |                                                                                  | 25835 |                      | 123.87        | 111.70      | -1.23       | 0.032     |
| 221448_s_at | TEX15    | testis expressed 15                                                              | 56154 | Hs.458316, Hs.571446 | 54.39         | 49.47       | -1.21       | 0.032     |
| 220730_at   |          |                                                                                  | 80220 |                      | 89.17         | 81.23       | -1.21       | 0.032     |
| 206850_at   | RASL10A  | RAS-like, family 10, member A                                                    | 10633 | Hs.73088             | 101.29        | 91.05       | -1.24       | 0.032     |
| 38447_at    | ADRBK1   | adrenergic, beta, receptor kinase 1                                              | 156   | Hs.83636             | 603.45        | 553.31      | -1.19       | 0.032     |
| 211941_s_at | PEBP1    | phosphatidylethanolamine binding protein 1                                       | 5037  | Hs.433863            | 1319.28       | 1564.93     | 1.41        | 0.032     |
| 218071_s_at | MKRN2    | makorin, ring finger protein, 2                                                  | 23609 | Hs.591666            | 114.20        | 124.73      | 1.19        | 0.033     |
| 220008_at   | SGK269   | NKF3 kinase family member                                                        | 79834 | Hs.9587              | 153.61        | 139.21      | -1.22       | 0.033     |
| 202043_s_at | SMS      | spermine synthase                                                                | 6611  | Hs.288487            | 62.77         | 73.62       | 1.38        | 0.033     |
| 222102_at   | GSTA3    | glutathione S-transferase A3                                                     | 2940  | Hs.102484            | 36.18         | 32.45       | -1.24       | 0.033     |
| 219768_at   | VTCN1    | V-set domain containing T cell activation inhibitor 1                            | 79679 | Hs.546434            | 71.31         | 64.95       | -1.21       | 0.033     |
| 219616_at   | FLJ21963 | FLJ21963 protein                                                                 | 79611 | Hs.259559            | 82.33         | 74.03       | -1.24       | 0.033     |
| 201068_s_at | PSMC2    | proteasome (prosome, macropain) 26S subunit, ATPase, 2                           | 5701  | Hs.437366            | 420.38        | 487.17      | 1.34        | 0.033     |
| 206719_at   | SYNGR4   | synaptogyrin 4                                                                   | 23546 | Hs.408333            | 53.06         | 48.09       | -1.22       | 0.033     |
| 205642_at   | CEP110   | centrosomal protein 110kDa                                                       | 11064 | Hs.653263            | 77.54         | 70.76       | -1.20       | 0.033     |
| 221194_s_at | LOC51136 | PTD016 protein                                                                   | 51136 | Hs.531701            | 60.46         | 55.11       | -1.20       | 0.033     |
| 202386_s_at | KIAA0430 | KIAA0430                                                                         | 9665  | Hs.173524            | 59.22         | 70.18       | 1.40        | 0.033     |
| 208872_s_at | REEP5    | receptor accessory protein 5                                                     | 7905  | Hs.429608            | 679.81        | 795.72      | 1.37        | 0.033     |
| 211410_x_at | KIR2DL5A | killer cell immunoglobulin-like receptor, two domains, long cytoplasmic tail, 5A | 57292 | Hs.676464            | 115.57        | 103.83      | -1.24       | 0.033     |
| 213820_s_at | STARD5   | StAR-related lipid transfer (START) domain containing 5                          | 80765 | Hs.513075            | 95.19         | 86.30       | -1.22       | 0.033     |

| Probe       | Symbol      | Description                                                                | Gene  | UniGene                 | Av Exp Female | Av Exp Male | Fold Change | adj P val |
|-------------|-------------|----------------------------------------------------------------------------|-------|-------------------------|---------------|-------------|-------------|-----------|
| 221686_s_at | RECQL5      | RecQ protein-like 5                                                        | 9400  | Hs.632229               | 288.12        | 257.17      | -1.26       | 0.033     |
| 207233_s_at | MITF        | microphthalmia-associated transcription factor                             | 4286  | Hs.166017,<br>Hs.618266 | 210.23        | 247.38      | 1.38        | 0.033     |
| 211153_s_at | TNFSF11     | tumor necrosis factor (ligand) superfamily, member 11                      | 8600  | Hs.333791               | 53.06         | 46.82       | -1.28       | 0.033     |
| 219819_s_at | MRPS28      | mitochondrial ribosomal protein S28                                        | 28957 | Hs.521124               | 217.65        | 262.18      | 1.45        | 0.033     |
| 207471_at   |             |                                                                            | 29026 |                         | 15.18         | 14.23       | -1.14       | 0.033     |
| 211219_s_at | LHX2        | LIM homeobox 2                                                             | 9355  | Hs.445265               | 34.95         | 31.85       | -1.20       | 0.033     |
| 214763_at   | ACOT11      | acyl-CoA thioesterase 11                                                   | 26027 | Hs.234786               | 149.27        | 170.55      | 1.31        | 0.033     |
| 218488_at   | EIF2B3      | eukaryotic translation initiation factor 2B, subunit 3 gamma, 58kDa        | 8891  | Hs.533549               | 244.05        | 269.22      | 1.22        | 0.033     |
| 200844_s_at | PRDX6       | peroxiredoxin 6                                                            | 9588  | Hs.573688               | 954.33        | 1104.31     | 1.34        | 0.033     |
| 220396_at   | PRO2268     | hypothetical protein PRO2268                                               | 55390 |                         | 183.10        | 168.23      | -1.18       | 0.033     |
| 210817_s_at | CALCOCO2    | calcium binding and coiled-coil domain 2                                   | 10241 | Hs.514920               | 479.14        | 546.70      | 1.30        | 0.033     |
| 220976_s_at | KRTAP1-1    | keratin associated protein 1-1                                             | 81851 | Hs.247934               | 36.46         | 33.04       | -1.22       | 0.033     |
| 216432_at   | SLC28A2     | solute carrier family 28 (sodium-coupled nucleoside transporter), member 2 | 9153  | Hs.367833               | 91.20         | 82.40       | -1.22       | 0.033     |
| 220741_s_at | PPA2        | pyrophosphatase (inorganic) 2                                              | 27068 | Hs.654957               | 369.63        | 426.51      | 1.33        | 0.033     |
| 210797_s_at | OASL        | 2'-5'-oligoadenylate synthetase-like                                       | 8638  | Hs.118633               | 193.65        | 178.05      | -1.18       | 0.033     |
| 211806_s_at | KCNJ15      | potassium inwardly-rectifying channel, subfamily J, member 15              | 3772  | Hs.411299               | 124.01        | 112.37      | -1.22       | 0.033     |
| 219732_at   | RP11-35N6.1 | plasticity related gene 3                                                  | 54886 | Hs.382683               | 24.59         | 22.22       | -1.22       | 0.033     |
| 220460_at   | SLCO1C1     | solute carrier organic anion transporter family, member 1C1                | 53919 | Hs.47261                | 38.09         | 34.02       | -1.25       | 0.033     |
| 220584_at   | FLJ22184    | hypothetical protein FLJ22184                                              | 80164 | Hs.288540               | 147.92        | 130.58      | -1.28       | 0.033     |
| 218554_s_at | ASH1L       | ash1 (absent, small, or homeotic)-like (Drosophila)                        | 55870 | Hs.491060               | 115.86        | 104.05      | -1.24       | 0.033     |
| 210924_at   | OLFM1       | olfactomedin 1                                                             | 10439 | Hs.522484               | 221.28        | 199.37      | -1.23       | 0.033     |
| 209566_at   | INSIG2      | insulin induced gene 2                                                     | 51141 | Hs.7089                 | 31.83         | 36.34       | 1.30        | 0.033     |
| 202614_at   | SLC30A9     | solute carrier family 30 (zinc transporter), member 9                      | 10463 | Hs.479634               | 159.98        | 193.12      | 1.46        | 0.033     |
| 201071_x_at | SF3B1       | splicing factor 3b,                                                        | 23451 | Hs.632554               | 601.38        | 696.06      | 1.34        | 0.034     |

| Probe       | Symbol    | Description                                                     | Gene  | UniGene   | Av Exp Female | Av Exp Male | Fold Change | adj P val |
|-------------|-----------|-----------------------------------------------------------------|-------|-----------|---------------|-------------|-------------|-----------|
|             |           | subunit 1, 155kDa                                               |       |           |               |             |             |           |
| 212311_at   | KIAA0746  | KIAA0746 protein                                                | 23231 | Hs.479384 | 64.18         | 56.20       | -1.30       | 0.034     |
| 217391_x_at | KIAA0409  | KIAA0409                                                        | 23378 | Hs.652255 | 197.80        | 175.00      | -1.28       | 0.034     |
| 218851_s_at | WDR33     | WD repeat domain 33                                             | 55339 | Hs.620490 | 17.71         | 16.48       | -1.15       | 0.034     |
| 209075_s_at | ISCU      | iron-sulfur cluster scaffold homolog (E. coli)                  | 23479 | Hs.615131 | 1559.60       | 1746.08     | 1.25        | 0.034     |
| 208723_at   | USP11     | ubiquitin specific peptidase 11                                 | 8237  | Hs.171501 | 267.56        | 313.94      | 1.38        | 0.034     |
| 206280_at   | CDH18     | cadherin 18, type 2                                             | 1016  | Hs.317632 | 78.82         | 71.40       | -1.22       | 0.034     |
| 201953_at   | CIB1      | calcium and integrin binding 1 (calmyrin)                       | 10519 | Hs.135471 | 270.30        | 302.34      | 1.25        | 0.034     |
| 217130_at   | C9orf33   | chromosome 9 open reading frame 33                              | 90477 | Hs.667154 | 32.65         | 30.35       | -1.16       | 0.034     |
| 212096_s_at | MTUS1     | mitochondrial tumor suppressor 1                                | 57509 | Hs.7946   | 682.05        | 805.42      | 1.39        | 0.034     |
| 212465_at   | SETD3     | SET domain containing 3                                         | 84193 | Hs.510407 | 299.64        | 343.43      | 1.31        | 0.034     |
| 218644_at   | PLEK2     | pleckstrin 2                                                    | 26499 | Hs.170473 | 135.49        | 125.85      | -1.16       | 0.034     |
| 206439_at   | EPYC      | epiphycan                                                       | 1833  | Hs.435680 | 13.33         | 12.56       | -1.13       | 0.034     |
| 202562_s_at | C14orf1   | chromosome 14 open reading frame 1                              | 11161 | Hs.15106  | 96.18         | 104.97      | 1.19        | 0.034     |
| 217971_at   | MAP2K1IP1 | mitogen-activated protein kinase kinase 1 interacting protein 1 | 8649  | Hs.647988 | 127.65        | 152.13      | 1.42        | 0.034     |
| 217772_s_at | MTCH2     | mitochondrial carrier homolog 2 (C. elegans)                    | 23788 | Hs.269944 | 373.75        | 422.76      | 1.28        | 0.034     |
| 208511_at   | PTTG3     | pituitary tumor-transforming 3                                  | 26255 | Hs.647156 | 33.64         | 30.39       | -1.23       | 0.034     |
| 213348_at   | CDKN1C    | cyclin-dependent kinase inhibitor 1C (p57, Kip2)                | 1028  | Hs.106070 | 253.16        | 300.56      | 1.41        | 0.034     |
| 219344_at   | SLC29A3   | solute carrier family 29 (nucleoside transporters), member 3    | 55315 | Hs.438419 | 200.75        | 183.50      | -1.20       | 0.034     |
| 201485_s_at | RCN2      | reticulocalbin 2, EF-hand calcium binding domain                | 5955  | Hs.79088  | 94.09         | 111.81      | 1.41        | 0.034     |
| 221107_at   | CHRNA9    | cholinergic receptor, nicotinic, alpha 9                        | 55584 | Hs.272278 | 28.71         | 26.63       | -1.16       | 0.034     |
| 210861_s_at | WISP3     | WNT1 inducible signaling pathway protein 3                      | 8838  | Hs.558428 | 21.41         | 19.57       | -1.20       | 0.034     |
| 201956_s_at | GNPAT     | glyceronephosphate O-acyltransferase                            | 8443  | Hs.498028 | 395.87        | 456.68      | 1.33        | 0.034     |
| 220725_x_at |           |                                                                 | 80165 |           | 154.51        | 131.81      | -1.37       | 0.034     |
| 206408_at   | LRRTM2    | leucine rich repeat transmembrane neuronal 2                    | 26045 | Hs.656653 | 27.32         | 25.20       | -1.18       | 0.034     |
| 217769_s_at | POMP      | proteasome maturation                                           | 51371 | Hs.268742 | 854.23        | 973.66      | 1.30        | 0.034     |

| Probe       | Symbol  | Description                                                                                   | Gene  | UniGene              | Av Exp Female | Av Exp Male | Fold Change | adj P val |
|-------------|---------|-----------------------------------------------------------------------------------------------|-------|----------------------|---------------|-------------|-------------|-----------|
|             |         | protein                                                                                       |       |                      |               |             |             |           |
| 201648_at   | JAK1    | Janus kinase 1 (a protein tyrosine kinase)                                                    | 3716  | Hs.207538            | 395.76        | 460.63      | 1.35        | 0.034     |
| 209057_x_at | CDC5L   | CDC5 cell division cycle 5-like ( <i>S. pombe</i> )                                           | 988   | Hs.485471            | 286.12        | 249.75      | -1.31       | 0.034     |
| 207205_at   | CEACAM4 | carcinoembryonic antigen-related cell adhesion molecule 4                                     | 1089  | Hs.12                | 193.49        | 179.62      | -1.16       | 0.035     |
| 209891_at   | SPC25   | SPC25, NDC80 kinetochore complex component, homolog ( <i>S. cerevisiae</i> )                  | 57405 | Hs.421956            | 16.35         | 15.39       | -1.13       | 0.035     |
| 210690_at   | KLRC4   | killer cell lectin-like receptor subfamily C, member 4                                        | 8302  | Hs.387787, Hs.665704 | 10.82         | 10.44       | -1.08       | 0.035     |
| 201600_at   | PHB2    | prohibitin 2                                                                                  | 11331 | Hs.504620            | 1135.13       | 1262.83     | 1.24        | 0.035     |
| 205445_at   | PRL     | prolactin                                                                                     | 5617  | Hs.1905              | 42.07         | 38.26       | -1.21       | 0.035     |
| 220522_at   | CRB1    | crumbs homolog 1 ( <i>Drosophila</i> )                                                        | 23418 | Hs.126135            | 54.34         | 49.93       | -1.18       | 0.035     |
| 210799_at   | HTR1B   | 5-hydroxytryptamine (serotonin) receptor 1B                                                   | 3351  | Hs.123016            | 72.55         | 64.37       | -1.27       | 0.035     |
| 208382_s_at | DMC1    | DMC1 dosage suppressor of mck1 homolog, meiosis-specific homologous recombination (yeast)     | 11144 | Hs.339396            | 31.96         | 29.24       | -1.20       | 0.035     |
| 203585_at   | ZNF185  | zinc finger protein 185 (LIM domain)                                                          | 7739  | Hs.16622             | 80.57         | 72.23       | -1.24       | 0.035     |
| 220379_at   | FSCN3   | fascin homolog 3, actin-bundling protein, testicular ( <i>Strongylocentrotus purpuratus</i> ) | 29999 | Hs.430657            | 216.86        | 196.16      | -1.22       | 0.035     |
| 206121_at   | AMPD1   | adenosine monophosphate deaminase 1 (isoform M)                                               | 270   | Hs.89570             | 40.01         | 34.76       | -1.33       | 0.035     |
| 202336_s_at | PAM     | peptidylglycine alpha-amidating monooxygenase                                                 | 5066  | Hs.369430            | 2276.34       | 2576.14     | 1.28        | 0.035     |
| 220834_at   | MS4A12  | membrane-spanning 4-domains, subfamily A, member 12                                           | 54860 | Hs.272789            | 33.78         | 31.12       | -1.18       | 0.035     |
| 207503_at   | TCP10   | t-complex 10 (mouse)                                                                          | 6953  | Hs.351, Hs.119929    | 33.66         | 30.56       | -1.21       | 0.035     |
| 200878_at   | EPAS1   | endothelial PAS domain protein 1                                                              | 2034  | Hs.468410            | 1263.80       | 1430.77     | 1.28        | 0.035     |
| 205419_at   | EBI2    | Epstein-Barr virus induced gene 2 (lymphocyte-specific G protein-coupled                      | 1880  | Hs.784               | 19.23         | 17.06       | -1.27       | 0.035     |



| Probe       | Symbol  | Description                                                                              | Gene  | UniGene   | Av Exp Female | Av Exp Male | Fold Change | adj P val |
|-------------|---------|------------------------------------------------------------------------------------------|-------|-----------|---------------|-------------|-------------|-----------|
| 205888_s_at | JAKMIP2 | receptor)<br>janus kinase and microtubule interacting protein 2                          | 9832  | Hs.184323 | 39.64         | 36.17       | -1.20       | 0.035     |
| 220774_at   | DYM     | dymeclin                                                                                 | 54808 | Hs.162996 | 19.45         | 18.38       | -1.12       | 0.035     |
| 217629_at   | GNGT2   | guanine nucleotide binding protein (G protein), gamma transducing activity polypeptide 2 | 2793  | Hs.181781 | 93.83         | 86.81       | -1.17       | 0.035     |
| 213990_s_at | PAK7    | p21(CDKN1A)-activated kinase 7                                                           | 57144 | Hs.32539  | 44.01         | 40.27       | -1.19       | 0.035     |
| 207014_at   | GABRA2  | gamma-aminobutyric acid (GABA) A receptor, alpha 2                                       | 2555  | Hs.116250 | 15.67         | 14.90       | -1.11       | 0.035     |
| 202037_s_at | SFRP1   | secreted frizzled-related protein 1                                                      | 6422  | Hs.213424 | 236.22        | 330.15      | 1.95        | 0.035     |
| 207385_at   | TFDP3   | transcription factor Dp family, member 3                                                 | 51270 | Hs.142908 | 33.84         | 30.56       | -1.23       | 0.036     |
| 49878_at    | PEX16   | peroxisomal biogenesis factor 16                                                         | 9409  | Hs.100915 | 365.18        | 338.36      | -1.16       | 0.036     |
| 221375_at   | OR1G1   | olfactory receptor, family 1, subfamily G, member 1                                      | 8390  | Hs.248183 | 63.56         | 57.96       | -1.20       | 0.036     |
| 219767_s_at | CRYZL1  | crystallin, zeta (quinone reductase)-like 1                                              | 9946  | Hs.352671 | 67.21         | 78.30       | 1.36        | 0.036     |
| 44120_at    | ADCK2   | aarF domain containing kinase 2                                                          | 90956 | Hs.534141 | 144.37        | 134.62      | -1.15       | 0.036     |
| 221086_s_at | FEZF2   | FEZ family zinc finger 2                                                                 | 55079 | Hs.241523 | 15.52         | 14.34       | -1.17       | 0.036     |
| 206989_s_at | SFRS2IP | splicing factor, arginine/serine-rich 2, interacting protein                             | 9169  | Hs.210367 | 120.38        | 143.90      | 1.43        | 0.036     |
| 207409_at   | LECT2   | leukocyte cell-derived chemotaxin 2                                                      | 3950  | Hs.512580 | 27.51         | 24.90       | -1.22       | 0.036     |
| 209976_s_at | CYP2E1  | cytochrome P450, family 2, subfamily E, polypeptide 1                                    | 1571  | Hs.12907  | 48.36         | 43.66       | -1.23       | 0.036     |
| 203350_at   | AP1G1   | adaptor-related protein complex 1, gamma 1 subunit                                       | 164   | Hs.461253 | 145.17        | 130.11      | -1.24       | 0.036     |
| 207141_s_at | KCNJ3   | potassium inwardly-rectifying channel, subfamily J, member 3                             | 3760  | Hs.591606 | 29.45         | 26.20       | -1.26       | 0.036     |
| 207072_at   | IL18RAP | interleukin 18 receptor accessory protein                                                | 8807  | Hs.158315 | 27.28         | 24.61       | -1.23       | 0.036     |
| 205242_at   | CXCL13  | chemokine (C-X-C motif) ligand 13 (B-cell chemoattractant)                               | 10563 | Hs.100431 | 24.79         | 22.09       | -1.26       | 0.036     |
| 208765_s_at | HNRNPR  | heterogeneous nuclear ribonucleoprotein R                                                | 10236 | Hs.373763 | 222.04        | 255.14      | 1.32        | 0.036     |
| 213376_at   | ZBTB1   | zinc finger and BTB                                                                      | 22890 | Hs.655536 | 69.43         | 87.74       | 1.60        | 0.036     |

| Probe       | Symbol    | Description                                                                                     | Gene   | UniGene              | Av Exp Female | Av Exp Male | Fold Change | adj P val |
|-------------|-----------|-------------------------------------------------------------------------------------------------|--------|----------------------|---------------|-------------|-------------|-----------|
|             |           | domain containing 1                                                                             |        |                      |               |             |             |           |
| 217060_at   | TRBV17    | T cell receptor beta variable 17                                                                | 28570  |                      | 41.14         | 37.61       | -1.20       | 0.036     |
| 206160_at   | APOBEC2   | apolipoprotein B mRNA editing enzyme, catalytic polypeptide-like 2                              | 10930  | Hs.555915            | 484.27        | 553.08      | 1.30        | 0.036     |
| 207775_at   | MGC4859   | hypothetical protein MGC4859 similar to HSPA8                                                   | 79150  | Hs.571301            | 14.16         | 13.41       | -1.11       | 0.036     |
| 206335_at   | GALNS     | galactosamine (N-acetyl)-6-sulfate sulfatase (Morquio syndrome, mucopolysaccharidosis type IVA) | 2588   | Hs.271383            | 97.56         | 89.32       | -1.19       | 0.036     |
| 206892_at   | AMHR2     | anti-Mullerian hormone receptor, type II                                                        | 269    | Hs.659889            | 137.40        | 124.33      | -1.22       | 0.036     |
| 206940_s_at | POU4F1    | POU class 4 homeobox 1                                                                          | 5457   | Hs.654522            | 21.16         | 19.65       | -1.16       | 0.036     |
| 211325_x_at | LOC171220 | destrin-2 pseudogene                                                                            | 171220 | Hs.661103            | 109.58        | 118.56      | 1.17        | 0.036     |
| 203145_at   | SPAG5     | sperm associated antigen 5                                                                      | 10615  | Hs.514033            | 48.62         | 44.71       | -1.18       | 0.036     |
| 219139_s_at | RBP4      | retinol binding protein 4, plasma                                                               | 5950   | Hs.50223             | 44.90         | 41.12       | -1.19       | 0.036     |
| 215603_x_at | LOC728226 | similar to gamma-glutamyltransferase 2                                                          | 728226 | Hs.454906            | 70.50         | 63.23       | -1.24       | 0.036     |
| 221470_s_at | IL1F7     | interleukin 1 family, member 7 (zeta)                                                           | 27178  | Hs.166371            | 23.31         | 21.36       | -1.19       | 0.036     |
| 205470_s_at | KLK11     | kallikrein-related peptidase 11                                                                 | 11012  | Hs.57771             | 87.93         | 78.37       | -1.26       | 0.036     |
| 220150_s_at | C6orf60   | chromosome 6 open reading frame 60                                                              | 79632  | Hs.443789            | 68.34         | 60.66       | -1.27       | 0.036     |
| 207501_s_at | FGF12     | fibroblast growth factor 12                                                                     | 2257   | Hs.584758            | 252.37        | 343.81      | 1.86        | 0.036     |
| 214342_at   | ATXN7L1   | ataxin 7-like 1                                                                                 | 222255 | Hs.489603            | 38.18         | 35.15       | -1.18       | 0.036     |
| 208524_at   | GPR15     | G protein-coupled receptor 15                                                                   | 2838   | Hs.563128            | 64.57         | 58.15       | -1.23       | 0.036     |
| 214576_at   | KRT36     | keratin 36                                                                                      | 8689   | Hs.248189            | 28.66         | 26.46       | -1.17       | 0.036     |
| 211835_at   | IGHV4-31  | immunoglobulin heavy variable 4-31                                                              | 28396  | Hs.510635            | 85.42         | 76.26       | -1.25       | 0.036     |
| 203195_s_at | NUP98     | nucleoporin 98kDa                                                                               | 4928   | Hs.524750            | 106.12        | 116.38      | 1.20        | 0.036     |
| 221121_at   | CXorf48   | chromosome X open reading frame 48                                                              | 54967  | Hs.272804            | 26.12         | 24.22       | -1.16       | 0.036     |
| 210271_at   | NEUROD2   | neurogenic differentiation 2                                                                    | 4761   | Hs.322431            | 68.94         | 61.92       | -1.24       | 0.036     |
| 206521_s_at | GTF2A1    | general transcription factor IIA, 1, 19/37kDa                                                   | 2957   | Hs.592334, Hs.593630 | 32.55         | 30.23       | -1.16       | 0.036     |
| 205490_x_at | GJB3      | gap junction protein, beta 3, 31kDa                                                             | 2707   | Hs.522561            | 102.30        | 93.52       | -1.20       | 0.036     |

| Probe       | Symbol    | Description                                                                              | Gene  | UniGene   | Av Exp Female | Av Exp Male | Fold Change | adj P val |
|-------------|-----------|------------------------------------------------------------------------------------------|-------|-----------|---------------|-------------|-------------|-----------|
| 219974_x_at | ECHDC1    | enoyl Coenzyme A hydratase domain containing 1                                           | 55862 | Hs.486410 | 170.55        | 192.20      | 1.27        | 0.036     |
| 220334_at   | RGS17     | regulator of G-protein signaling 17                                                      | 26575 | Hs.166313 | 50.21         | 46.53       | -1.16       | 0.036     |
| 209303_at   | NDUFS4    | NADH dehydrogenase (ubiquinone) Fe-S protein 4, 18kDa (NADH-coenzyme Q reductase)        | 4724  | Hs.528222 | 551.69        | 642.56      | 1.36        | 0.036     |
| 218994_s_at | FLJ13195  | stromal antigen 3-like                                                                   | 64940 | Hs.632013 | 21.03         | 18.88       | -1.24       | 0.036     |
| 201034_at   | ADD3      | adducin 3 (gamma)                                                                        | 120   | Hs.501012 | 578.15        | 706.28      | 1.49        | 0.036     |
| 206345_s_at | PON1      | paraoxonase 1                                                                            | 5444  | Hs.370995 | 33.71         | 29.82       | -1.28       | 0.036     |
| 210502_s_at | PPIE      | peptidylprolyl isomerase E (cyclophilin E)                                               | 10450 | Hs.524690 | 108.41        | 120.97      | 1.25        | 0.036     |
| 221421_s_at | ADAMTS12  | ADAM metalloproteinase with thrombospondin type 1 motif, 12                              | 81792 | Hs.12680  | 61.08         | 55.70       | -1.20       | 0.036     |
| 221707_s_at | VPS53     | vacuolar protein sorting 53 homolog (S. cerevisiae)                                      | 55275 | Hs.461819 | 39.42         | 36.24       | -1.18       | 0.036     |
| 212785_s_at | LARP7     | La ribonucleoprotein domain family, member 7                                             | 51574 | Hs.642978 | 191.77        | 228.22      | 1.42        | 0.036     |
| 204211_x_at | EIF2AK2   | eukaryotic translation initiation factor 2-alpha kinase 2                                | 5610  | Hs.131431 | 173.19        | 159.28      | -1.18       | 0.036     |
| 220669_at   | OTUD4     | OTU domain containing 4                                                                  | 54726 | Hs.270851 | 19.81         | 18.59       | -1.13       | 0.036     |
| 221394_at   | TAAR2     | trace amine associated receptor 2                                                        | 9287  | Hs.272382 | 64.58         | 58.93       | -1.20       | 0.036     |
| 221174_at   |           |                                                                                          | 80107 |           | 16.52         | 15.57       | -1.13       | 0.036     |
| 215142_at   | CXorf27   | chromosome X open reading frame 27                                                       | 25763 | Hs.122959 | 63.76         | 57.37       | -1.24       | 0.036     |
| 220304_s_at | CNGB3     | cyclic nucleotide gated channel beta 3                                                   | 54714 | Hs.154433 | 35.96         | 33.07       | -1.18       | 0.036     |
| 214539_at   | SERPINB10 | serpin peptidase inhibitor, clade B (ovalbumin), member 10                               | 5273  | Hs.158339 | 58.75         | 53.14       | -1.22       | 0.036     |
| 206841_at   | PDE6H     | phosphodiesterase 6H, cGMP-specific, cone, gamma                                         | 5149  | Hs.54471  | 18.30         | 17.24       | -1.13       | 0.036     |
| 221331_x_at | CTLA4     | cytotoxic T-lymphocyte-associated protein 4                                              | 1493  | Hs.247824 | 73.34         | 65.60       | -1.25       | 0.036     |
| 210604_at   | GNAT2     | guanine nucleotide binding protein (G protein), alpha transducing activity polypeptide 2 | 2780  | Hs.36973  | 34.80         | 31.96       | -1.19       | 0.036     |

| Probe       | Symbol   | Description                                                        | Gene   | UniGene              | Av Exp Female | Av Exp Male | Fold Change | adj P val |
|-------------|----------|--------------------------------------------------------------------|--------|----------------------|---------------|-------------|-------------|-----------|
| 200726_at   | PPP1CC   | protein phosphatase 1, catalytic subunit, gamma isoform            | 5501   | Hs.79081             | 542.67        | 634.96      | 1.37        | 0.036     |
| 221314_at   | GDF9     | growth differentiation factor 9                                    | 2661   | Hs.25022             | 62.57         | 55.66       | -1.26       | 0.036     |
| 221444_at   | TAS2R16  | taste receptor, type 2, member 16                                  | 50833  | Hs.272395            | 29.14         | 25.78       | -1.28       | 0.037     |
| 200617_at   | KIAA0152 | KIAA0152                                                           | 9761   | Hs.507074            | 474.79        | 523.55      | 1.22        | 0.037     |
| 221102_s_at | TRPM6    | transient receptor potential cation channel, subfamily M, member 6 | 140803 | Hs.272225            | 46.43         | 42.00       | -1.22       | 0.037     |
| 222289_at   | KCNC2    | potassium voltage-gated channel, Shaw-related subfamily, member 2  | 3747   | Hs.591041            | 26.75         | 30.36       | 1.29        | 0.037     |
| 206326_at   | GRP      | gastrin-releasing peptide                                          | 2922   | Hs.153444            | 51.60         | 48.14       | -1.15       | 0.037     |
| 208259_x_at | IFNA7    | interferon, alpha 7                                                | 3444   | Hs.282274            | 66.20         | 60.13       | -1.21       | 0.037     |
| 217965_s_at | SAP30BP  | SAP30 binding protein                                              | 29115  | Hs.655088            | 51.62         | 57.40       | 1.24        | 0.037     |
| 48580_at    | CXXC1    | CXXC finger 1 (PHD domain)                                         | 30827  | Hs.180933            | 567.26        | 529.46      | -1.15       | 0.037     |
| 200065_s_at | ARF1     | ADP-ribosylation factor 1                                          | 375    | Hs.286221            | 1065.96       | 1189.10     | 1.24        | 0.037     |
| 207176_s_at | CD80     | CD80 molecule                                                      | 941    | Hs.838               | 68.25         | 61.64       | -1.23       | 0.037     |
| 205260_s_at | ACYP1    | acylphosphatase 1, erythrocyte (common) type                       | 97     | Hs.18573             | 31.60         | 35.64       | 1.27        | 0.037     |
| 200668_s_at | UBE2D3   | ubiquitin-conjugating enzyme E2D 3 (UBC4/5 homolog, yeast)         | 7323   | Hs.518773            | 628.85        | 759.10      | 1.46        | 0.037     |
| 200050_at   | ZNF146   | zinc finger protein 146                                            | 7705   | Hs.643436, Hs.651111 | 81.84         | 95.36       | 1.36        | 0.037     |
| 212199_at   | MRFAP1L1 | Morf4 family associated protein 1-like 1                           | 114932 | Hs.593159            | 204.51        | 242.52      | 1.41        | 0.037     |
| 208060_at   | PAX7     | paired box 7                                                       | 5081   | Hs.113253            | 57.45         | 53.75       | -1.14       | 0.037     |
| 201651_s_at | PACSIN2  | protein kinase C and casein kinase substrate in neurons 2          | 11252  | Hs.162877            | 510.27        | 585.92      | 1.32        | 0.037     |
| 208144_s_at |          |                                                                    | 83400  |                      | 20.84         | 19.55       | -1.14       | 0.037     |
| 220034_at   | IRAK3    | interleukin-1 receptor-associated kinase 3                         | 11213  | Hs.369265            | 27.70         | 25.35       | -1.19       | 0.037     |
| 221390_s_at | MTMR7    | myotubularin related protein 7                                     | 9108   | Hs.625674            | 113.55        | 102.08      | -1.24       | 0.037     |
| 208619_at   | DDB1     | damage-specific DNA binding protein 1, 127kDa                      | 1642   | Hs.290758, Hs.656935 | 373.48        | 407.23      | 1.19        | 0.037     |
| 220181_x_at | SLC30A5  | solute carrier family 30 (zinc transporter), member 5              | 64924  | Hs.631975            | 92.38         | 83.64       | -1.22       | 0.037     |

| Probe       | Symbol   | Description                                                                 | Gene  | UniGene   | Av Exp Female | Av Exp Male | Fold Change | adj P val |
|-------------|----------|-----------------------------------------------------------------------------|-------|-----------|---------------|-------------|-------------|-----------|
| 207693_at   | CACNB4   | calcium channel, voltage-dependent, beta 4 subunit                          | 785   | Hs.614033 | 101.62        | 89.17       | -1.30       | 0.037     |
| 214519_s_at | RLN2     | relaxin 2                                                                   | 6019  | Hs.127032 | 22.94         | 21.30       | -1.16       | 0.037     |
| 207929_at   | GRPR     | gastrin-releasing peptide receptor                                          | 2925  | Hs.567282 | 252.06        | 227.62      | -1.23       | 0.037     |
| 200987_x_at | PSME3    | proteasome (prosome, macropain) activator subunit 3 (PA28 gamma; Ki)        | 10197 | Hs.152978 | 172.48        | 193.79      | 1.26        | 0.037     |
| 208378_x_at | FGF5     | fibroblast growth factor 5                                                  | 2250  | Hs.37055  | 58.41         | 53.72       | -1.18       | 0.038     |
| 216750_at   | APBB2    | amyloid beta (A4) precursor protein-binding, family B, member 2 (Fe65-like) | 323   | Hs.479602 | 86.97         | 79.39       | -1.20       | 0.038     |
| 211504_x_at | ROCK2    | Rho-associated, coiled-coil containing protein kinase 2                     | 9475  | Hs.591600 | 217.90        | 198.81      | -1.20       | 0.038     |
| 218510_x_at | FAM134B  | family with sequence similarity 134, member B                               | 54463 | Hs.481704 | 978.68        | 1141.11     | 1.36        | 0.038     |
| 220651_s_at | MCM10    | minichromosome maintenance complex component 10                             | 55388 | Hs.198363 | 25.60         | 23.27       | -1.21       | 0.038     |
| 211496_s_at | PDC      | phosducin                                                                   | 5132  | Hs.654381 | 16.99         | 16.01       | -1.13       | 0.038     |
| 218034_at   | FIS1     | fission 1 (mitochondrial outer membrane) homolog ( <i>S. cerevisiae</i> )   | 51024 | Hs.423968 | 540.21        | 625.12      | 1.34        | 0.038     |
| 212782_x_at | POLR2J   | polymerase (RNA) II (DNA directed) polypeptide J, 13.3kDa                   | 5439  | Hs.654952 | 500.72        | 602.11      | 1.45        | 0.038     |
| 213501_at   | ACOX1    | acyl-Coenzyme A oxidase 1, palmitoyl                                        | 51    | Hs.464137 | 51.18         | 57.82       | 1.28        | 0.038     |
| 211123_at   | SLC5A5   | solute carrier family 5 (sodium iodide symporter), member 5                 | 6528  | Hs.584804 | 153.41        | 140.57      | -1.19       | 0.038     |
| 210911_at   | ID2B     | inhibitor of DNA binding 2B, dominant negative helix-loop-helix protein     | 84099 | Hs.591670 | 17.98         | 16.75       | -1.15       | 0.038     |
| 220577_at   |          |                                                                             | 80073 |           | 44.52         | 40.78       | -1.19       | 0.038     |
| 218792_s_at | BSPRY    | B-box and SPRY domain containing                                            | 54836 | Hs.632677 | 63.21         | 57.07       | -1.23       | 0.038     |
| 219444_at   | BCORL1   | BCL6 co-repressor-like 1                                                    | 63035 | Hs.496748 | 111.81        | 103.73      | -1.16       | 0.038     |
| 215853_at   | SDCCAG8  | serologically defined colon cancer antigen 8                                | 10806 | Hs.591530 | 19.30         | 17.84       | -1.17       | 0.038     |
| 211383_s_at | WDR37    | WD repeat domain 37                                                         | 22884 | Hs.188495 | 183.68        | 208.84      | 1.29        | 0.038     |
| 213839_at   | KIAA0500 | KIAA0500 protein                                                            | 57237 | Hs.593760 | 32.87         | 30.42       | -1.17       | 0.038     |
| 208037_s_at | MADCAM1  | mucosal vascular addressin cell adhesion                                    | 8174  | Hs.102598 | 55.98         | 51.65       | -1.17       | 0.038     |

| Probe       | Symbol    | Description                                                              | Gene   | UniGene              | Av Exp Female | Av Exp Male | Fold Change | adj P val |
|-------------|-----------|--------------------------------------------------------------------------|--------|----------------------|---------------|-------------|-------------|-----------|
|             |           | molecule 1                                                               |        |                      |               |             |             |           |
| 217781_s_at | ZFP106    | zinc finger protein 106 homolog (mouse)                                  | 64397  | Hs.511143            | 1702.31       | 1952.61     | 1.32        | 0.038     |
| 220694_at   | DDEF1IT1  | DDEF1 intronic transcript 1                                              | 29065  | Hs.658387            | 49.87         | 44.04       | -1.28       | 0.038     |
| 220426_at   | C20orf195 | chromosome 20 open reading frame 195                                     | 79025  | Hs.197755            | 32.74         | 29.56       | -1.23       | 0.038     |
| 221434_s_at | C14orf156 | chromosome 14 open reading frame 156                                     | 81892  | Hs.655105            | 601.73        | 714.25      | 1.41        | 0.038     |
| 210497_x_at | SSX2      | synovial sarcoma, X breakpoint 2                                         | 6757   | Hs.289105, Hs.661107 | 117.69        | 107.83      | -1.19       | 0.039     |
| 206433_s_at | SPOCK3    | sparc/osteonectin, cwcv and kazal-like domains proteoglycan (testican) 3 | 50859  | Hs.481133            | 13.48         | 12.88       | -1.09       | 0.039     |
| 220093_at   | ANTXR1    | anthrax toxin receptor 1                                                 | 84168  | Hs.165859            | 75.68         | 70.43       | -1.15       | 0.039     |
| 220575_at   | FAM106A   | family with sequence similarity 106, member A                            | 80039  | Hs.674403            | 34.64         | 31.75       | -1.19       | 0.039     |
| 211609_x_at | PSMD4     | proteasome (prosome, macropain) 26S subunit, non-ATPase, 4               | 5710   | Hs.505059            | 440.04        | 492.49      | 1.25        | 0.039     |
| 207148_x_at | MYOZ2     | myozenin 2                                                               | 51778  | Hs.381047            | 3154.00       | 3543.79     | 1.26        | 0.039     |
| 208971_at   | UROD      | uroporphyrinogen decarboxylase                                           | 7389   | Hs.78601             | 187.00        | 207.56      | 1.23        | 0.039     |
| 221080_s_at | DENND1C   | DENN/MADD domain containing 1C                                           | 79958  | Hs.236449            | 114.65        | 103.60      | -1.22       | 0.039     |
| 216998_s_at | ADAM5P    | ADAM metallopeptidase domain 5 pseudogene                                | 255926 | Hs.369765            | 67.60         | 61.72       | -1.20       | 0.039     |
| 209888_s_at | MYL1      | myosin, light chain 1, alkali; skeletal, fast                            | 4632   | Hs.187338            | 66.17         | 59.02       | -1.26       | 0.039     |
| 216817_s_at | OR2H1     | olfactory receptor, family 2, subfamily H, member 1                      | 26716  | Hs.434715, Hs.686942 | 80.60         | 74.47       | -1.17       | 0.039     |
| 211312_s_at | WISP1     | WNT1 inducible signaling pathway protein 1                               | 8840   | Hs.492974            | 94.93         | 84.65       | -1.26       | 0.039     |
| 214355_x_at | LOC643854 | similar to CTAGE family, member 5                                        | 643854 | Hs.632613            | 187.25        | 168.48      | -1.24       | 0.039     |
| 206952_at   | G6PC      | glucose-6-phosphatase, catalytic subunit                                 | 2538   | Hs.212293            | 12.91         | 12.29       | -1.10       | 0.039     |
| 206880_at   | P2RXL1    | purinergic receptor P2X-like 1, orphan receptor                          | 9127   | Hs.113275            | 191.38        | 174.09      | -1.21       | 0.039     |
| 205676_at   | CYP27B1   | cytochrome P450, family 27, subfamily B, polypeptide 1                   | 1594   | Hs.524528            | 59.38         | 53.73       | -1.22       | 0.039     |
| 206608_s_at | RPGRIP1   | retinitis pigmentosa GTPase regulator interacting protein 1              | 57096  | Hs.126035            | 60.40         | 55.86       | -1.17       | 0.039     |

| Probe       | Symbol   | Description                                                        | Gene   | UniGene              | Av Exp Female | Av Exp Male | Fold Change | adj P val |
|-------------|----------|--------------------------------------------------------------------|--------|----------------------|---------------|-------------|-------------|-----------|
| 212406_s_at | MYT1     | myelin transcription factor 1                                      | 4661   | Hs.279562            | 155.32        | 197.58      | 1.62        | 0.039     |
| 212561_at   | RAB6IP1  | RAB6 interacting protein 1                                         | 23258  | Hs.501857            | 423.94        | 478.48      | 1.27        | 0.039     |
| 217942_at   | MRPS35   | mitochondrial ribosomal protein S35                                | 60488  | Hs.311072            | 289.98        | 327.21      | 1.27        | 0.039     |
| 206586_at   | CNR2     | cannabinoid receptor 2 (macrophage)                                | 1269   | Hs.73037             | 132.71        | 121.65      | -1.19       | 0.039     |
| 214876_s_at | TUBGCP5  | tubulin, gamma complex associated protein 5                        | 114791 | Hs.533898            | 14.43         | 15.30       | 1.12        | 0.039     |
| 207919_at   | ART1     | ADP-ribosyltransferase 1                                           | 417    | Hs.382188            | 126.53        | 115.47      | -1.20       | 0.039     |
| 207111_at   | EMR1     | egf-like module containing, mucin-like, hormone receptor-like 1    | 2015   | Hs.2375              | 64.41         | 58.62       | -1.21       | 0.039     |
| 203632_s_at | GPRC5B   | G protein-coupled receptor, family C, group 5, member B            | 51704  | Hs.148685            | 213.99        | 245.09      | 1.31        | 0.039     |
| 206947_at   | B3GALT5  | UDP-Gal:betaGlcNAc beta 1,3-galactosyltransferase, polypeptide 5   | 10317  | Hs.655094            | 29.21         | 26.45       | -1.22       | 0.039     |
| 208720_s_at | RBM39    | RNA binding motif protein 39                                       | 9584   | Hs.282901            | 267.79        | 310.13      | 1.34        | 0.040     |
| 208909_at   | UQCRCF1  | ubiquinol-cytochrome c reductase, Rieske iron-sulfur polypeptide 1 | 7386   | Hs.170107            | 2698.21       | 2984.29     | 1.22        | 0.040     |
| 202736_s_at | LSM4     | LSM4 homolog, U6 small nuclear RNA associated (S. cerevisiae)      | 25804  | Hs.515255            | 140.79        | 169.52      | 1.45        | 0.040     |
| 215267_s_at | SLC8A2   | solute carrier family 8 (sodium-calcium exchanger), member 2       | 6543   | Hs.172884            | 73.74         | 66.72       | -1.22       | 0.040     |
| 219403_s_at | HPSE     | heparanase                                                         | 10855  | Hs.44227             | 41.03         | 36.73       | -1.25       | 0.040     |
| 219945_at   | DDX25    | DEAD (Asp-Glu-Ala-Asp) box polypeptide 25                          | 29118  | Hs.420263            | 19.35         | 18.09       | -1.14       | 0.040     |
| 203577_at   | GTF2H4   | general transcription factor IIH, polypeptide 4, 52kDa             | 2968   | Hs.485070            | 31.31         | 34.15       | 1.19        | 0.040     |
| 207392_x_at | UGT2B15  | UDP glucuronosyltransferase 2 family, polypeptide B15              | 7366   | Hs.150207, Hs.694718 | 39.57         | 36.67       | -1.16       | 0.040     |
| 200075_s_at | GUK1     | guanylate kinase 1                                                 | 2987   | Hs.376933            | 157.16        | 193.28      | 1.51        | 0.040     |
| 211713_x_at | KIAA0101 | KIAA0101                                                           | 9768   | Hs.81892             | 53.55         | 48.09       | -1.24       | 0.040     |
| 201145_at   | HAX1     | HCLS1 associated protein X-1                                       | 10456  | Hs.199625            | 893.72        | 985.27      | 1.22        | 0.040     |
| 212453_at   | KIAA1279 | KIAA1279                                                           | 26128  | Hs.279580            | 228.14        | 269.81      | 1.40        | 0.040     |

| Probe       | Symbol  | Description                                                      | Gene   | UniGene              | Av Exp Female | Av Exp Male | Fold Change | adj P val |
|-------------|---------|------------------------------------------------------------------|--------|----------------------|---------------|-------------|-------------|-----------|
| 203103_s_at | PRPF19  | PRP19/PSO4 pre-mRNA processing factor 19 homolog (S. cerevisiae) | 27339  | Hs.502705            | 167.71        | 183.08      | 1.19        | 0.040     |
| 213445_at   | ZC3H3   | zinc finger CCCH-type containing 3                               | 23144  | Hs.521915            | 61.62         | 56.41       | -1.19       | 0.040     |
| 221354_s_at | MCHR1   | melanin-concentrating hormone receptor 1                         | 2847   | Hs.248122            | 42.12         | 38.86       | -1.17       | 0.040     |
| 220776_at   | KCNJ14  | potassium inwardly-rectifying channel, subfamily J, member 14    | 3770   | Hs.590945, Hs.644912 | 33.58         | 30.75       | -1.19       | 0.040     |
| 201633_s_at | CYB5B   | cytochrome b5 type B (outer mitochondrial membrane)              | 80777  | Hs.461131            | 88.03         | 97.69       | 1.23        | 0.040     |
| 209397_at   | ME2     | malic enzyme 2, NAD(+)-dependent, mitochondrial                  | 4200   | Hs.233119            | 427.48        | 497.82      | 1.36        | 0.040     |
| 200620_at   | TMEM59  | transmembrane protein 59                                         | 9528   | Hs.523262            | 897.66        | 1012.88     | 1.27        | 0.040     |
| 219734_at   | SIDT1   | SID1 transmembrane family, member 1                              | 54847  | Hs.591291            | 14.78         | 13.73       | -1.16       | 0.040     |
| 210454_s_at | KCNJ6   | potassium inwardly-rectifying channel, subfamily J, member 6     | 3763   | Hs.658533            | 44.65         | 41.69       | -1.15       | 0.040     |
| 45653_at    | KCTD13  | potassium channel tetramerisation domain containing 13           | 253980 | Hs.534590            | 80.12         | 73.39       | -1.19       | 0.040     |
| 216678_at   | IFT122  | intraflagellar transport 122 homolog (Chlamydomonas)             | 55764  | Hs.655284            | 152.73        | 138.48      | -1.22       | 0.040     |
| 202925_s_at | PLAGL2  | pleiomorphic adenoma gene-like 2                                 | 5326   | Hs.154104            | 84.44         | 76.70       | -1.21       | 0.040     |
| 206007_at   | PRG4    | proteoglycan 4                                                   | 10216  | Hs.647723            | 20.59         | 19.06       | -1.17       | 0.040     |
| 220991_s_at | RNF32   | ring finger protein 32                                           | 140545 | Hs.490715            | 11.75         | 11.15       | -1.11       | 0.040     |
| 207757_at   | ZFP2    | zinc finger protein 2 homolog (mouse)                            | 80108  | Hs.654533            | 15.77         | 14.78       | -1.14       | 0.040     |
| 216623_x_at | TOX3    | TOX high mobility group box family member 3                      | 27324  | Hs.460789            | 11.71         | 11.20       | -1.09       | 0.040     |
| 207910_at   | SCGB1D1 | secretoglobin, family 1D, member 1                               | 10648  | Hs.202686            | 18.89         | 17.72       | -1.14       | 0.040     |
| 218898_at   | FAM57A  | family with sequence similarity 57, member A                     | 79850  | Hs.154396            | 91.34         | 83.91       | -1.18       | 0.040     |
| 221985_at   | KLHL24  | kelch-like 24 (Drosophila)                                       | 54800  | Hs.407709            | 138.19        | 164.87      | 1.42        | 0.040     |
| 218263_s_at | ZBED5   | zinc finger, BED-type containing 5                               | 58486  | Hs.655066            | 178.21        | 212.23      | 1.42        | 0.040     |
| 221202_at   |         |                                                                  | 55393  |                      | 17.16         | 16.06       | -1.14       | 0.040     |
| 205995_x_at | IQCB1   | IQ motif containing B1                                           | 9657   | Hs.604110            | 165.09        | 153.20      | -1.16       | 0.041     |
| 211956_s_at | EIF1    | eukaryotic translation initiation factor 1                       | 10209  | Hs.150580            | 3478.69       | 3763.18     | 1.17        | 0.041     |



| Probe       | Symbol    | Description                                                               | Gene   | UniGene                 | Av Exp<br>Female | Av Exp<br>Male | Fold<br>Change | adj P val |
|-------------|-----------|---------------------------------------------------------------------------|--------|-------------------------|------------------|----------------|----------------|-----------|
| 220939_s_at | DPP8      | dipeptidyl-peptidase 8                                                    | 54878  | Hs.591106               | 216.94           | 267.48         | 1.52           | 0.041     |
| 204887_s_at | PLK4      | polo-like kinase 4<br>(Drosophila)                                        | 10733  | Hs.172052               | 40.92            | 38.03          | -1.16          | 0.041     |
| 216196_at   | LOC440366 | hect domain and RLD 2<br>pseudogene                                       | 440366 | Hs.633945               | 42.00            | 38.53          | -1.19          | 0.041     |
| 201114_x_at | PSMA7     | proteasome (prosome,<br>macropain) subunit,<br>alpha type, 7              | 5688   | Hs.233952               | 654.32           | 749.54         | 1.31           | 0.041     |
| 205228_at   | RBMS2     | RNA binding motif,<br>single stranded<br>interacting protein 2            | 5939   | Hs.645521,<br>Hs.683360 | 66.80            | 61.20          | -1.19          | 0.041     |
| 212655_at   | ZCCHC14   | zinc finger, CCHC<br>domain containing 14                                 | 23174  | Hs.156231               | 66.55            | 75.82          | 1.30           | 0.041     |
| 201672_s_at | USP14     | ubiquitin specific<br>peptidase 14 (tRNA-<br>guanine<br>transglycosylase) | 9097   | Hs.464416,<br>Hs.660783 | 245.85           | 285.06         | 1.34           | 0.041     |
| 210411_s_at | GRIN2B    | glutamate receptor,<br>ionotropic, N-methyl D-<br>aspartate 2B            | 2904   | Hs.654430               | 49.19            | 45.46          | -1.17          | 0.041     |
| 219205_at   | SRR       | serine racemase                                                           | 63826  | Hs.461954               | 159.26           | 144.39         | -1.22          | 0.041     |
| 205432_at   | OVGP1     | oviductal glycoprotein<br>1, 120kDa (mucin 9,<br>oviductin)               | 5016   | Hs.1154                 | 261.94           | 234.81         | -1.24          | 0.041     |
| 221072_at   | C9orf31   | chromosome 9 open<br>reading frame 31                                     | 57000  | Hs.522373               | 61.14            | 55.99          | -1.19          | 0.041     |
| 217098_s_at | ZSCAN12   | zinc finger and SCAN<br>domain containing 12                              | 9753   | Hs.134816               | 24.00            | 22.40          | -1.15          | 0.041     |
| 214479_at   | GFRA3     | GDNF family receptor<br>alpha 3                                           | 2676   | Hs.58042                | 95.35            | 87.16          | -1.20          | 0.041     |
| 200997_at   | RBM4      | RNA binding motif<br>protein 4                                            | 5936   | Hs.533712               | 207.19           | 231.16         | 1.24           | 0.041     |
| 218163_at   | MCTS1     | malignant T cell<br>amplified sequence 1                                  | 28985  | Hs.102696               | 158.79           | 183.29         | 1.33           | 0.041     |
| 220942_x_at | C3orf28   | chromosome 3 open<br>reading frame 28                                     | 26355  | Hs.584881               | 1217.13          | 1350.69        | 1.23           | 0.041     |
| 215266_at   | DNAH3     | dynein, axonemal,<br>heavy chain 3                                        | 55567  | Hs.526500               | 151.94           | 140.40         | -1.17          | 0.041     |
| 218403_at   | TRIAP1    | TP53 regulated inhibitor<br>of apoptosis 1                                | 51499  | Hs.69499                | 236.47           | 258.74         | 1.20           | 0.041     |
| 201968_s_at | PGM1      | phosphoglucomutase 1                                                      | 5236   | Hs.1869                 | 1254.19          | 1424.94        | 1.29           | 0.041     |
| 214077_x_at | MEIS3P1   | Meis homeobox 3<br>pseudogene 1                                           | 4213   | Hs.356135               | 122.89           | 140.68         | 1.31           | 0.041     |
| 202964_s_at | RFX5      | regulatory factor X, 5<br>(influences HLA class II<br>expression)         | 5993   | Hs.632472               | 212.30           | 195.88         | -1.17          | 0.041     |
| 206604_at   | OVOL1     | ovo-like 1(Drosophila)                                                    | 5017   | Hs.134434               | 58.64            | 53.54          | -1.20          | 0.041     |
| 201348_at   | GPX3      | glutathione peroxidase<br>3 (plasma)                                      | 2878   | Hs.386793               | 2029.12          | 2659.30        | 1.72           | 0.041     |
| 216988_s_at | PTP4A2    | protein tyrosine<br>phosphatase type IVA,                                 | 8073   | Hs.470477               | 547.60           | 705.88         | 1.66           | 0.041     |

| Probe       | Symbol    | Description                                                                                                              | Gene   | UniGene              | Av Exp Female | Av Exp Male | Fold Change | adj P val |
|-------------|-----------|--------------------------------------------------------------------------------------------------------------------------|--------|----------------------|---------------|-------------|-------------|-----------|
|             |           | member 2                                                                                                                 |        |                      |               |             |             |           |
| 209230_s_at | NUPR1     | nuclear protein 1                                                                                                        | 26471  | Hs.513463            | 116.40        | 136.53      | 1.38        | 0.041     |
| 207178_s_at | FRK       | fyn-related kinase                                                                                                       | 2444   | Hs.89426             | 13.81         | 13.18       | -1.10       | 0.041     |
| 200965_s_at | ABLIM1    | actin binding LIM protein 1                                                                                              | 3983   | Hs.438236, Hs.538331 | 1905.74       | 2137.45     | 1.26        | 0.041     |
| 216702_x_at | ATP8A2    | ATPase, aminophospholipid transporter-like, Class I, type 8A, member 2                                                   | 51761  | Hs.444957            | 61.77         | 57.38       | -1.16       | 0.041     |
| 216732_at   | LOC389768 | similar to potassium channel tetramerisation domain containing 1                                                         | 389768 | Hs.636875            | 80.21         | 73.10       | -1.20       | 0.041     |
| 221771_s_at | HSMPP8    | M-phase phosphoprotein, mpp8                                                                                             | 54737  | Hs.269654            | 106.69        | 136.36      | 1.63        | 0.041     |
| 209694_at   | PTS       | 6-pyruvoyltetrahydropterin synthase                                                                                      | 5805   | Hs.503860            | 173.78        | 200.29      | 1.33        | 0.041     |
| 207497_s_at | MS4A2     | membrane-spanning 4-domains, subfamily A, member 2 (Fc fragment of IgE, high affinity I, receptor for; beta polypeptide) | 2206   | Hs.386748            | 30.25         | 27.99       | -1.17       | 0.041     |
| 219418_at   | NHEJ1     | nonhomologous end-joining factor 1                                                                                       | 79840  | Hs.225988            | 114.88        | 107.37      | -1.14       | 0.041     |
| 204119_s_at | ADK       | adenosine kinase                                                                                                         | 132    | Hs.656586            | 204.21        | 234.37      | 1.32        | 0.041     |
| 206840_at   | AFM       | afamin                                                                                                                   | 173    | Hs.168718            | 33.52         | 30.69       | -1.19       | 0.041     |
| 202042_at   | HARS      | histidyl-tRNA synthetase                                                                                                 | 3035   | Hs.528050            | 131.90        | 147.94      | 1.26        | 0.041     |
| 203540_at   | GFAP      | glial fibrillary acidic protein                                                                                          | 2670   | Hs.514227            | 43.73         | 40.04       | -1.19       | 0.041     |
| 203274_at   | F8A1      | coagulation factor VIII-associated (intronic transcript) 1                                                               | 8263   | Hs.533543, Hs.593687 | 303.10        | 340.19      | 1.26        | 0.041     |
| 217736_s_at | EIF2AK1   | eukaryotic translation initiation factor 2-alpha kinase 1                                                                | 27102  | Hs.520205            | 255.09        | 289.75      | 1.29        | 0.041     |
| 215948_x_at | ZMYM5     | zinc finger, MYM-type 5                                                                                                  | 9205   | Hs.530988            | 20.37         | 19.09       | -1.14       | 0.041     |
| 220227_at   |           |                                                                                                                          | 79941  |                      | 52.56         | 47.96       | -1.20       | 0.041     |
| 221160_s_at | CABP5     | calcium binding protein 5                                                                                                | 56344  | Hs.117694            | 63.36         | 57.89       | -1.20       | 0.041     |
| 219863_at   | HERC5     | hect domain and RLD 5                                                                                                    | 51191  | Hs.26663             | 60.48         | 53.94       | -1.26       | 0.041     |
| 208245_at   | RAB9P1    | RAB9, member RAS oncogene family, pseudogene 1                                                                           | 9366   | Hs.158296            | 11.71         | 11.23       | -1.09       | 0.042     |
| 210453_x_at | ATP5L     | ATP synthase, H+ transporting, mitochondrial F0 complex, subunit G                                                       | 10632  | Hs.486360            | 2599.40       | 2828.68     | 1.18        | 0.042     |
| 218672_at   | SCNM1     | sodium channel                                                                                                           | 79005  | Hs.432360            | 347.04        | 319.57      | -1.18       | 0.042     |

| Probe       | Symbol    | Description                                                                 | Gene   | UniGene              | Av Exp Female | Av Exp Male | Fold Change | adj P val |
|-------------|-----------|-----------------------------------------------------------------------------|--------|----------------------|---------------|-------------|-------------|-----------|
|             |           | modifier 1                                                                  |        |                      |               |             |             |           |
| 206772_at   | PTHR2     | parathyroid hormone receptor 2                                              | 5746   | Hs.570296            | 20.04         | 18.42       | -1.18       | 0.042     |
| 219242_at   | CEP63     | centrosomal protein 63kDa                                                   | 80254  | Hs.443301            | 74.56         | 86.10       | 1.33        | 0.042     |
| 207047_s_at | CLCNKA    | chloride channel Ka                                                         | 1187   | Hs.591533            | 57.65         | 51.71       | -1.24       | 0.042     |
| 206369_s_at | PIK3CG    | phosphoinositide-3-kinase, catalytic, gamma polypeptide                     | 5294   | Hs.32942             | 21.60         | 20.00       | -1.17       | 0.042     |
| 210021_s_at | CCNO      | cyclin O                                                                    | 10309  | Hs.3041              | 42.57         | 39.66       | -1.15       | 0.042     |
| 202567_at   | SNRPD3    | small nuclear ribonucleoprotein D3 polypeptide 18kDa                        | 6634   | Hs.356549            | 273.43        | 304.33      | 1.24        | 0.042     |
| 221484_at   | B4GALT5   | UDP-Gal:betaGlcNAc beta 1,4-galactosyltransferase, polypeptide 5            | 9334   | Hs.370487            | 134.02        | 155.17      | 1.34        | 0.042     |
| 216709_at   | LOC400655 | hypothetical gene supported by BC013370; BC034583                           | 400655 | Hs.579378            | 32.28         | 29.28       | -1.22       | 0.042     |
| 213315_x_at | CXorf40A  | chromosome X open reading frame 40A                                         | 91966  | Hs.654738            | 208.08        | 239.14      | 1.32        | 0.042     |
| 203790_s_at | HRSP12    | heat-responsive protein 12                                                  | 10247  | Hs.18426             | 152.59        | 176.68      | 1.34        | 0.042     |
| 208768_x_at | RPL22     | ribosomal protein L22                                                       | 6146   | Hs.515329, Hs.554762 | 2593.46       | 2799.33     | 1.17        | 0.042     |
| 206752_s_at | DFFB      | DNA fragmentation factor, 40kDa, beta polypeptide (caspase-activated DNase) | 1677   | Hs.133089            | 16.64         | 18.19       | 1.20        | 0.042     |
| 221414_s_at | DEFB126   | defensin, beta 126                                                          | 81623  | Hs.124211            | 23.64         | 22.18       | -1.14       | 0.042     |
| 220749_at   | C10orf68  | chromosome 10 open reading frame 68                                         | 79741  | Hs.585464            | 110.78        | 100.46      | -1.22       | 0.042     |
| 201703_s_at | PPP1R10   | protein phosphatase 1, regulatory (inhibitor) subunit 10                    | 5514   | Hs.106019            | 164.46        | 151.40      | -1.18       | 0.042     |
| 208679_s_at | ARPC2     | actin related protein 2/3 complex, subunit 2, 34kDa                         | 10109  | Hs.529303            | 417.73        | 511.73      | 1.50        | 0.042     |
| 220534_at   | TRIM48    | tripartite motif-containing 48                                              | 79097  | Hs.195715            | 40.17         | 36.73       | -1.20       | 0.042     |
| 202183_s_at | KIF22     | kinesin family member 22                                                    | 3835   | Hs.613351            | 88.65         | 102.76      | 1.34        | 0.042     |
| 204137_at   | GPR137B   | G protein-coupled receptor 137B                                             | 7107   | Hs.498160            | 85.42         | 104.28      | 1.49        | 0.042     |
| 221612_at   | LRTM1     | leucine-rich repeats and transmembrane domains 1                            | 57408  | Hs.591668            | 85.35         | 77.36       | -1.22       | 0.043     |
| 208026_at   | HIST1H4F  | histone cluster 1, H4f                                                      | 8361   | Hs.247816            | 16.39         | 15.35       | -1.14       | 0.043     |
| 206422_at   | GCG       | glucagon                                                                    | 2641   | Hs.516494            | 16.11         | 15.28       | -1.11       | 0.043     |

| Probe       | Symbol        | Description                                                                                      | Gene  | UniGene                                             | Av Exp Female | Av Exp Male | Fold Change | adj P val |
|-------------|---------------|--------------------------------------------------------------------------------------------------|-------|-----------------------------------------------------|---------------|-------------|-------------|-----------|
| 221958_s_at | GPR177        | G protein-coupled receptor 177                                                                   | 79971 | Hs.647659                                           | 180.77        | 205.05      | 1.29        | 0.043     |
| 221215_s_at | RIPK4         | receptor-interacting serine-threonine kinase 4                                                   | 54101 | Hs.517310                                           | 128.82        | 118.69      | -1.18       | 0.043     |
| 216525_x_at | PMS2L3        | postmeiotic segregation increased 2-like 3                                                       | 5387  | Hs.654716,<br>Hs.659871,<br>Hs.661055               | 98.75         | 109.05      | 1.22        | 0.043     |
| 212581_x_at | GAPDH         | glyceraldehyde-3-phosphate dehydrogenase                                                         | 2597  | Hs.479728,<br>Hs.544577,<br>Hs.592355               | 8844.35       | 9541.34     | 1.16        | 0.043     |
| 210708_x_at | CASP10        | caspase 10, apoptosis-related cysteine peptidase                                                 | 843   | Hs.5353                                             | 157.72        | 143.27      | -1.21       | 0.043     |
| 208004_at   | PROL1         | proline rich, lacrimal 1                                                                         | 58503 | Hs.661425                                           | 71.46         | 61.71       | -1.34       | 0.043     |
| 215657_at   | SLC26A3       | solute carrier family 26, member 3                                                               | 1811  | Hs.1650                                             | 22.74         | 21.53       | -1.12       | 0.043     |
| 216153_x_at | RECK          | reversion-inducing-cysteine-rich protein with kazal motifs                                       | 8434  | Hs.388918                                           | 273.22        | 226.79      | -1.45       | 0.043     |
| 216355_at   | PCDHB17       | protocadherin beta 17 pseudogene                                                                 | 54661 | Hs.284307                                           | 48.07         | 43.63       | -1.21       | 0.043     |
| 201384_s_at | NBR1          | neighbor of BRCA1 gene 1                                                                         | 4077  | Hs.277721,<br>Hs.373818,<br>Hs.546264,<br>Hs.693721 | 183.57        | 211.60      | 1.33        | 0.043     |
| 203477_at   | COL15A1       | collagen, type XV, alpha 1                                                                       | 1306  | Hs.409034                                           | 385.28        | 513.20      | 1.77        | 0.043     |
| 220884_at   |               |                                                                                                  | 55496 |                                                     | 11.67         | 11.16       | -1.09       | 0.043     |
| 208991_at   | STAT3         | signal transducer and activator of transcription 3 (acute-phase response factor)                 | 6774  | Hs.463059                                           | 538.23        | 665.84      | 1.53        | 0.043     |
| 205749_at   | CYP1A1        | cytochrome P450, family 1, subfamily A, polypeptide 1                                            | 1543  | Hs.72912                                            | 51.92         | 48.08       | -1.17       | 0.043     |
| 219613_s_at | SIRT6         | sirtuin (silent mating type information regulation 2 homolog) 6 (S. cerevisiae)                  | 51548 | Hs.423756                                           | 148.86        | 139.37      | -1.14       | 0.043     |
| 220852_at   | PRO1768       | PRO1768 protein                                                                                  | 29018 | Hs.652968,<br>Hs.673124                             | 54.65         | 48.83       | -1.25       | 0.043     |
| 215887_at   | ZNF277P       | zinc finger protein 277 pseudogene                                                               | 11179 | Hs.655904                                           | 102.91        | 92.65       | -1.23       | 0.043     |
| 214210_at   | SLC25A17      | solute carrier family 25 (mitochondrial carrier; peroxisomal membrane protein, 34kDa), member 17 | 10478 | Hs.474938                                           | 80.72         | 74.90       | -1.16       | 0.043     |
| 221594_at   | DKFZP564O0523 | hypothetical protein DKFZp564O0523                                                               | 84060 | Hs.21590                                            | 95.02         | 86.26       | -1.21       | 0.043     |

| Probe       | Symbol   | Description                                                                          | Gene  | UniGene              | Av Exp<br>Female | Av Exp<br>Male | Fold<br>Change | adj P val |
|-------------|----------|--------------------------------------------------------------------------------------|-------|----------------------|------------------|----------------|----------------|-----------|
| 202675_at   | SDHB     | succinate dehydrogenase complex, subunit B, iron sulfur (Ip)                         | 6390  | Hs.465924            | 355.54           | 426.35         | 1.44           | 0.043     |
| 52169_at    | LYK5     | protein kinase LYK5                                                                  | 92335 | Hs.514402            | 237.67           | 223.54         | -1.13          | 0.043     |
| 219770_at   | GTDC1    | glycosyltransferase-like domain containing 1                                         | 79712 | Hs.44780             | 121.25           | 133.88         | 1.22           | 0.043     |
| 212306_at   | CLASP2   | cytoplasmic linker associated protein 2                                              | 23122 | Hs.108614            | 106.26           | 129.21         | 1.48           | 0.043     |
| 211009_s_at | ZNF271   | zinc finger protein 271                                                              | 10778 | Hs.314246            | 49.62            | 57.69          | 1.35           | 0.043     |
| 206417_at   | CNGA1    | cyclic nucleotide gated channel alpha 1                                              | 1259  | Hs.1323              | 46.19            | 41.90          | -1.22          | 0.043     |
| 204909_at   | DDX6     | DEAD (Asp-Glu-Ala-Asp) box polypeptide 6                                             | 1656  | Hs.654366            | 21.58            | 19.78          | -1.19          | 0.043     |
| 221007_s_at | FIP1L1   | FIP1 like 1 (S. cerevisiae)                                                          | 81608 | Hs.518760            | 16.63            | 18.13          | 1.19           | 0.043     |
| 208311_at   | GPR50    | G protein-coupled receptor 50                                                        | 9248  | Hs.567390            | 26.20            | 24.13          | -1.18          | 0.043     |
| 206046_at   | ADAM23   | ADAM metallopeptidase domain 23                                                      | 8745  | Hs.591643            | 257.78           | 292.22         | 1.28           | 0.043     |
| 206685_at   | HCG4     | HLA complex group 4                                                                  | 54435 | Hs.660431            | 16.15            | 15.10          | -1.14          | 0.043     |
| 206191_at   | ENTPD3   | ectonucleoside triphosphate diphosphohydrolase 3                                     | 956   | Hs.441145            | 71.52            | 64.13          | -1.24          | 0.043     |
| 207570_at   | SHOX     | short stature homeobox                                                               | 6473  | Hs.105932            | 115.74           | 106.29         | -1.19          | 0.043     |
| 206442_at   | SEMG1    | semenogelin I                                                                        | 6406  | Hs.1968              | 17.88            | 16.61          | -1.16          | 0.044     |
| 220906_at   |          |                                                                                      | 80083 |                      | 23.80            | 25.60          | 1.16           | 0.044     |
| 220166_at   | CNNM1    | cyclin M1                                                                            | 26507 | Hs.274579            | 74.05            | 69.62          | -1.13          | 0.044     |
| 220043_s_at | MFI2     | antigen p97 (melanoma associated) identified by monoclonal antibodies 133.2 and 96.5 | 4241  | Hs.184727, Hs.694355 | 45.58            | 41.33          | -1.22          | 0.044     |
| 200918_s_at | SRPR     | signal recognition particle receptor ('docking protein')                             | 6734  | Hs.591936            | 502.80           | 557.90         | 1.23           | 0.044     |
| 221821_s_at | C12orf41 | chromosome 12 open reading frame 41                                                  | 54934 | Hs.505412            | 116.25           | 132.13         | 1.29           | 0.044     |
| 220863_at   | MIP      | major intrinsic protein of lens fiber                                                | 4284  | Hs.574026            | 38.38            | 35.18          | -1.19          | 0.044     |
| 221371_at   | TNFSF18  | tumor necrosis factor (ligand) superfamily, member 18                                | 8995  | Hs.248197            | 65.19            | 59.41          | -1.20          | 0.044     |
| 201172_x_at | ATP6VOE1 | ATPase, H+ transporting, lysosomal 9kDa, V0 subunit e1                               | 8992  | Hs.484188            | 925.37           | 1022.37        | 1.22           | 0.044     |
| 221452_s_at | TMEM14B  | transmembrane protein 14B                                                            | 81853 | Hs.273077            | 300.70           | 383.57         | 1.63           | 0.044     |
| 205928_at   | ZNF443   | zinc finger protein 443                                                              | 10224 | Hs.631623            | 91.94            | 84.00          | -1.20          | 0.044     |
| 207256_at   | MBL2     | mannose-binding lectin                                                               | 4153  | Hs.499674            | 15.13            | 14.40          | -1.10          | 0.044     |

| Probe       | Symbol   | Description                                                                                  | Gene   | UniGene   | Av Exp Female | Av Exp Male | Fold Change | adj P val |
|-------------|----------|----------------------------------------------------------------------------------------------|--------|-----------|---------------|-------------|-------------|-----------|
|             |          | (protein C) 2, soluble (opsonic defect)                                                      |        |           |               |             |             |           |
| 217893_s_at | C1orf108 | chromosome 1 open reading frame 108                                                          | 79647  | Hs.293563 | 88.21         | 100.34      | 1.29        | 0.044     |
| 216346_at   | SEC14L3  | SEC14-like 3 (S. cerevisiae)                                                                 | 266629 | Hs.505601 | 25.72         | 23.24       | -1.23       | 0.044     |
| 212849_at   | AXIN1    | axin 1                                                                                       | 8312   | Hs.592082 | 173.79        | 162.44      | -1.14       | 0.044     |
| 214560_at   | FPRL2    | formyl peptide receptor-like 2                                                               | 2359   | Hs.445466 | 85.62         | 76.28       | -1.26       | 0.044     |
| 219822_at   | MTRF1    | mitochondrial translational release factor 1                                                 | 9617   | Hs.382176 | 29.82         | 32.36       | 1.18        | 0.044     |
| 207446_at   | TLR6     | toll-like receptor 6                                                                         | 10333  | Hs.662185 | 44.40         | 40.33       | -1.21       | 0.044     |
| 214591_at   | KLHL4    | kelch-like 4 (Drosophila)                                                                    | 56062  | Hs.49075  | 32.12         | 29.56       | -1.18       | 0.044     |
| 206830_at   | SLC4A10  | solute carrier family 4, sodium bicarbonate transporter-like, member 10                      | 57282  | Hs.333958 | 12.64         | 12.04       | -1.10       | 0.044     |
| 201455_s_at | NPEPPS   | aminopeptidase puromycin sensitive                                                           | 9520   | Hs.443837 | 187.51        | 212.96      | 1.29        | 0.044     |
| 215639_at   | SH2D3C   | SH2 domain containing 3C                                                                     | 10044  | Hs.306412 | 35.68         | 33.03       | -1.17       | 0.044     |
| 203605_at   | SRP54    | signal recognition particle 54kDa                                                            | 6729   | Hs.167535 | 109.14        | 124.37      | 1.30        | 0.044     |
| 211945_s_at | ITGB1    | integrin, beta 1 (fibronectin receptor, beta polypeptide, antigen CD29 includes MDF2, MSK12) | 3688   | Hs.643813 | 1326.68       | 1499.92     | 1.28        | 0.044     |
| 221520_s_at | CDCA8    | cell division cycle associated 8                                                             | 55143  | Hs.524571 | 56.30         | 52.32       | -1.16       | 0.044     |
| 206663_at   | SP4      | Sp4 transcription factor                                                                     | 6671   | Hs.88013  | 51.73         | 45.64       | -1.28       | 0.044     |
| 218180_s_at | EPS8L2   | EPS8-like 2                                                                                  | 64787  | Hs.55016  | 51.78         | 47.39       | -1.19       | 0.044     |
| 213636_at   | KIAA1045 | KIAA1045                                                                                     | 23349  | Hs.7989   | 42.99         | 39.80       | -1.17       | 0.044     |
| 206733_at   | TULP2    | tubby like protein 2                                                                         | 7288   | Hs.104636 | 43.90         | 40.60       | -1.17       | 0.044     |
| 208805_at   | PSMA6    | proteasome (prosome, macropain) subunit, alpha type, 6                                       | 5687   | Hs.446260 | 679.27        | 773.07      | 1.30        | 0.044     |
| 206502_s_at | INSM1    | insulinoma-associated 1                                                                      | 3642   | Hs.89584  | 16.49         | 15.33       | -1.16       | 0.044     |
| 204733_at   | KLK6     | kallikrein-related peptidase 6                                                               | 5653   | Hs.79361  | 57.69         | 52.37       | -1.21       | 0.044     |
| 212123_at   | TCTN3    | tectonic family member 3                                                                     | 26123  | Hs.438991 | 312.27        | 288.90      | -1.17       | 0.044     |
| 218076_s_at | ARHGAP17 | Rho GTPase activating protein 17                                                             | 55114  | Hs.373793 | 288.67        | 314.80      | 1.19        | 0.044     |
| 211023_at   | PDHB     | pyruvate dehydrogenase (lipoamide) beta                                                      | 5162   | Hs.161357 | 1124.75       | 1279.34     | 1.29        | 0.044     |
| 34858_at    | KCTD2    | potassium channel                                                                            | 23510  | Hs.514468 | 221.98        | 243.37      | 1.20        | 0.044     |

| Probe       | Symbol     | Description                                                                                                                       | Gene   | UniGene              | Av Exp Female | Av Exp Male | Fold Change | adj P val |
|-------------|------------|-----------------------------------------------------------------------------------------------------------------------------------|--------|----------------------|---------------|-------------|-------------|-----------|
| 219650_at   | ERCC6L     | tetramerisation domain containing 2<br>excision repair cross-complementing rodent repair deficiency, complementation group 6-like | 54821  | Hs.47558             | 21.83         | 20.77       | -1.11       | 0.044     |
| 210031_at   | CD247      | CD247 molecule                                                                                                                    | 919    | Hs.156445            | 48.96         | 43.43       | -1.27       | 0.044     |
| 212895_s_at | ABR        | active BCR-related gene                                                                                                           | 29     | Hs.159306            | 295.60        | 332.62      | 1.27        | 0.044     |
| 220429_at   | NDST3      | N-deacetylase/N-sulfotransferase (heparan glucosaminy) 3                                                                          | 9348   | Hs.480596            | 23.69         | 21.91       | -1.17       | 0.044     |
| 220285_at   | FAM108B1   | family with sequence similarity 108, member B1                                                                                    | 51104  | Hs.380389            | 54.84         | 49.30       | -1.24       | 0.044     |
| 217544_at   | LOC729806  | similar to Zinc finger protein 492                                                                                                | 729806 | Hs.635482            | 20.24         | 19.01       | -1.13       | 0.044     |
| 219809_at   | WDR55      | WD repeat domain 55                                                                                                               | 54853  | Hs.286261            | 84.66         | 78.15       | -1.17       | 0.044     |
| 218552_at   | ECHDC2     | enoyl Coenzyme A hydratase domain containing 2                                                                                    | 55268  | Hs.476319            | 265.50        | 301.86      | 1.29        | 0.044     |
| 220979_s_at | ST6GALNAC5 | ST6 (alpha-N-acetylneuraminy)l-2,3-beta-galactosyl-1,3)-N-acetylgalactosaminide alpha-2,6-sialyltransferase 5                     | 81849  | Hs.303609            | 18.56         | 17.14       | -1.17       | 0.044     |
| 203450_at   | CBY1       | chibby homolog 1 (Drosophila)                                                                                                     | 25776  | Hs.334911, Hs.596584 | 248.18        | 271.93      | 1.20        | 0.044     |
| 206678_at   | GABRA1     | gamma-aminobutyric acid (GABA) A receptor, alpha 1                                                                                | 2554   | Hs.175934            | 40.85         | 36.71       | -1.24       | 0.044     |
| 206159_at   | GDF10      | growth differentiation factor 10                                                                                                  | 2662   | Hs.2171              | 63.19         | 58.26       | -1.18       | 0.044     |
| 220899_at   |            |                                                                                                                                   | 80038  |                      | 21.99         | 20.37       | -1.17       | 0.044     |
| 206633_at   | CHRNA1     | cholinergic receptor, nicotinic, alpha 1 (muscle)                                                                                 | 1134   | Hs.434479            | 73.97         | 69.39       | -1.14       | 0.044     |
| 218814_s_at | C1orf75    | chromosome 1 open reading frame 75                                                                                                | 55248  | Hs.445386            | 42.27         | 38.89       | -1.18       | 0.044     |
| 211070_x_at | DBI        | diazepam binding inhibitor (GABA receptor modulator, acyl-Coenzyme A binding protein)                                             | 1622   | Hs.78888             | 1453.22       | 1617.77     | 1.24        | 0.044     |
| 207197_at   | ZIC3       | Zic family member 3 heterotaxy 1 (odd-paired homolog, Drosophila)                                                                 | 7547   | Hs.111227            | 38.74         | 34.46       | -1.26       | 0.044     |
| 200992_at   | IPO7       | importin 7                                                                                                                        | 10527  | Hs.652248            | 427.93        | 515.42      | 1.45        | 0.044     |

| Probe       | Symbol   | Description                                                                   | Gene  | UniGene              | Av Exp Female | Av Exp Male | Fold Change | adj P val |
|-------------|----------|-------------------------------------------------------------------------------|-------|----------------------|---------------|-------------|-------------|-----------|
| 204083_s_at | TPM2     | tropomyosin 2 (beta)                                                          | 7169  | Hs.300772            | 339.10        | 415.99      | 1.50        | 0.044     |
| 206912_at   | FOXE1    | forkhead box E1 (thyroid transcription factor 2)                              | 2304  | Hs.159234            | 16.29         | 15.24       | -1.14       | 0.044     |
| 208668_x_at | HMG2     | high-mobility group nucleosomal binding domain 2                              | 3151  | Hs.181163            | 1345.60       | 1478.21     | 1.21        | 0.044     |
| 200863_s_at | RAB11A   | RAB11A, member RAS oncogene family                                            | 8766  | Hs.321541            | 550.93        | 620.18      | 1.27        | 0.044     |
| 215500_at   | LOC92017 | similar to RIKEN cDNA 4933437K13                                              | 92017 | Hs.585745            | 47.19         | 43.56       | -1.17       | 0.044     |
| 203074_at   | ANXA8L2  | annexin A8-like 2                                                             | 244   | Hs.693604            | 113.25        | 104.10      | -1.18       | 0.044     |
| 209440_at   | PRPS1    | phosphoribosyl pyrophosphate synthetase 1                                     | 5631  | Hs.56                | 215.33        | 237.65      | 1.22        | 0.044     |
| 220249_at   | HYAL4    | hyaluronoglucosaminidase 4                                                    | 23553 | Hs.28673             | 44.29         | 40.89       | -1.17       | 0.044     |
| 208777_s_at | PSMD11   | proteasome (prosome, macropain) 26S subunit, non-ATPase, 11                   | 5717  | Hs.655396            | 181.16        | 207.45      | 1.31        | 0.045     |
| 220559_at   | EN1      | engrailed homeobox 1                                                          | 2019  | Hs.271977            | 14.12         | 13.27       | -1.13       | 0.045     |
| 208895_s_at | DDX18    | DEAD (Asp-Glu-Ala-Asp) box polypeptide 18                                     | 8886  | Hs.363492            | 210.21        | 238.35      | 1.29        | 0.045     |
| 202800_at   | SLC1A3   | solute carrier family 1 (glial high affinity glutamate transporter), member 3 | 6507  | Hs.481918            | 271.50        | 318.93      | 1.38        | 0.045     |
| 218182_s_at | CLDN1    | claudin 1                                                                     | 9076  | Hs.439060            | 22.77         | 21.59       | -1.11       | 0.045     |
| 200066_at   | IK       | IK cytokine, down-regulator of HLA II                                         | 3550  | Hs.421245            | 277.89        | 312.71      | 1.27        | 0.045     |
| 208614_s_at | FLNB     | filamin B, beta (actin binding protein 278)                                   | 2317  | Hs.476448, Hs.666396 | 174.35        | 191.61      | 1.21        | 0.045     |
| 207665_at   | ADAM21   | ADAM metallopeptidase domain 21                                               | 8747  | Hs.178748            | 49.82         | 45.49       | -1.20       | 0.045     |
| 221276_s_at | SYNC1    | syncollin, intermediate filament 1                                            | 81493 | Hs.655938            | 20.93         | 24.12       | 1.33        | 0.045     |
| 207420_at   | COLEC10  | collectin sub-family member 10 (C-type lectin)                                | 10584 | Hs.176615            | 28.35         | 26.38       | -1.16       | 0.045     |
| 221167_s_at | CCDC70   | coiled-coil domain containing 70                                              | 83446 | Hs.120573            | 38.42         | 34.34       | -1.25       | 0.045     |
| 200828_s_at | ZNF207   | zinc finger protein 207                                                       | 7756  | Hs.500775            | 308.90        | 367.62      | 1.42        | 0.045     |
| 200027_at   | NARS     | asparaginyl-tRNA synthetase                                                   | 4677  | Hs.465224            | 660.37        | 762.93      | 1.33        | 0.045     |
| 206804_at   | CD3G     | CD3g molecule, gamma (CD3-TCR complex)                                        | 917   | Hs.2259              | 88.30         | 79.75       | -1.23       | 0.045     |
| 203376_at   | CDC40    | cell division cycle 40 homolog (S. cerevisiae)                                | 51362 | Hs.428147            | 207.30        | 226.69      | 1.20        | 0.045     |



| Probe       | Symbol    | Description                                                             | Gene  | UniGene             | Av Exp Female | Av Exp Male | Fold Change | adj P val |
|-------------|-----------|-------------------------------------------------------------------------|-------|---------------------|---------------|-------------|-------------|-----------|
| 214192_at   | NUP88     | nucleoporin 88kDa                                                       | 4927  | Hs.584784           | 109.91        | 99.47       | -1.22       | 0.045     |
| 202853_s_at | RYK       | RYK receptor-like tyrosine kinase                                       | 6259  | Hs.654562           | 191.63        | 220.38      | 1.32        | 0.045     |
| 208799_at   | PSMB5     | proteasome (prosome, macropain) subunit, beta type, 5                   | 5693  | Hs.422990           | 489.10        | 537.95      | 1.21        | 0.045     |
| 211733_x_at | SCP2      | sterol carrier protein 2                                                | 6342  | Hs.476365           | 254.62        | 323.10      | 1.61        | 0.045     |
| 202753_at   | PSMD6     | proteasome (prosome, macropain) 26S subunit, non-ATPase, 6              | 9861  | Hs.152536           | 598.30        | 682.18      | 1.30        | 0.046     |
| 210675_s_at | PTPRR     | protein tyrosine phosphatase, receptor type, R                          | 5801  | Hs.506076           | 26.21         | 24.69       | -1.13       | 0.046     |
| 216207_x_at | IGKV1D-13 | immunoglobulin kappa variable 1D-13                                     | 28902 | Hs.390427           | 224.22        | 168.59      | -1.77       | 0.046     |
| 218170_at   | ISOC1     | isochorismatase domain containing 1                                     | 51015 | Hs.483296           | 203.65        | 256.57      | 1.59        | 0.046     |
| 220112_at   | ANKRD55   | ankyrin repeat domain 55                                                | 79722 | Hs.436214           | 26.78         | 24.16       | -1.23       | 0.046     |
| 207766_at   | CDKL1     | cyclin-dependent kinase-like 1 (CDC2-related kinase)                    | 8814  | Hs.654590           | 24.82         | 23.23       | -1.14       | 0.046     |
| 211223_at   | PROP1     | PROP paired-like homeobox 1                                             | 5626  | Hs.158301           | 130.55        | 116.49      | -1.26       | 0.046     |
| 209488_s_at | RBPMS     | RNA binding protein with multiple splicing                              | 11030 | Hs.334587           | 475.22        | 569.04      | 1.43        | 0.046     |
| 201544_x_at | PABPN1    | poly(A) binding protein, nuclear 1                                      | 8106  | Hs.117176           | 440.54        | 504.07      | 1.31        | 0.046     |
| 211107_s_at | AURKC     | aurora kinase C                                                         | 6795  | Hs.98338            | 58.47         | 52.04       | -1.26       | 0.046     |
| 207217_s_at | NOX1      | NADPH oxidase 1                                                         | 27035 | Hs.592227           | 115.83        | 105.47      | -1.21       | 0.046     |
| 209279_s_at | NSDHL     | NAD(P) dependent steroid dehydrogenase-like                             | 50814 | Hs.57698            | 73.78         | 81.47       | 1.22        | 0.046     |
| 218175_at   | CCDC92    | coiled-coil domain containing 92                                        | 80212 | Hs.114111           | 542.08        | 608.04      | 1.26        | 0.046     |
| 213725_x_at | XYLT1     | xylosyltransferase I                                                    | 64131 | Hs.22907, Hs.610023 | 27.96         | 25.83       | -1.17       | 0.046     |
| 219522_at   | FJX1      | four jointed box 1 (Drosophila)                                         | 24147 | Hs.39384            | 53.58         | 49.56       | -1.17       | 0.046     |
| 212885_at   | MPHOSPH10 | M-phase phosphoprotein 10 (U3 small nucleolar ribonucleoprotein)        | 10199 | Hs.656208           | 111.40        | 123.06      | 1.22        | 0.046     |
| 221449_s_at | ITFG1     | integrin alpha FG-GAP repeat containing 1                               | 81533 | Hs.42217            | 509.24        | 600.19      | 1.39        | 0.046     |
| 201536_at   | DUSP3     | dual specificity phosphatase 3 (vaccinia virus phosphatase VH1-related) | 1845  | Hs.181046           | 1167.14       | 1293.36     | 1.23        | 0.046     |
| 212408_at   | TOR1AIP1  | torsin A interacting protein 1                                          | 26092 | Hs.496459           | 290.87        | 351.66      | 1.46        | 0.046     |

| Probe       | Symbol   | Description                                                        | Gene  | UniGene                 | Av Exp Female | Av Exp Male | Fold Change | adj P val |
|-------------|----------|--------------------------------------------------------------------|-------|-------------------------|---------------|-------------|-------------|-----------|
| 217409_at   | MYO5A    | myosin VA (heavy chain 12, myosin)                                 | 4644  | Hs.21213                | 27.93         | 25.81       | -1.17       | 0.046     |
| 219995_s_at | ZNF750   | zinc finger protein 750                                            | 79755 | Hs.464391,<br>Hs.653124 | 11.02         | 10.62       | -1.08       | 0.046     |
| 204723_at   | SCN3B    | sodium channel, voltage-gated, type III, beta                      | 55800 | Hs.4865                 | 91.22         | 82.42       | -1.23       | 0.047     |
| 202520_s_at | MLH1     | mutL homolog 1, colon cancer, nonpolyposis type 2 (E. coli)        | 4292  | Hs.195364               | 363.54        | 403.61      | 1.23        | 0.047     |
| 219498_s_at | BCL11A   | B-cell CLL/lymphoma 11A (zinc finger protein)                      | 53335 | Hs.370549               | 199.97        | 188.81      | -1.12       | 0.047     |
| 216340_s_at | CYP2A7P1 | cytochrome P450, family 2, subfamily A, polypeptide 7 pseudogene 1 | 1550  | Hs.250615               | 67.05         | 62.01       | -1.17       | 0.047     |
| 206171_at   | ADORA3   | adenosine A3 receptor                                              | 140   | Hs.281342               | 122.75        | 108.80      | -1.27       | 0.047     |
| 203584_at   | TTC35    | tetratricopeptide repeat domain 35                                 | 9694  | Hs.654351               | 85.62         | 103.44      | 1.46        | 0.047     |
| 202109_at   | ARFIP2   | ADP-ribosylation factor interacting protein 2 (arfaptin 2)         | 23647 | Hs.75139                | 222.33        | 208.40      | -1.14       | 0.047     |
| 217004_s_at | MCF2     | MCF.2 cell line derived transforming sequence                      | 4168  | Hs.387262               | 23.89         | 22.61       | -1.12       | 0.047     |
| 221622_s_at | TMEM126B | transmembrane protein 126B                                         | 55863 | Hs.525063               | 267.24        | 317.07      | 1.41        | 0.047     |
| 204290_s_at | ALDH6A1  | aldehyde dehydrogenase 6 family, member A1                         | 4329  | Hs.293970               | 280.97        | 346.20      | 1.52        | 0.047     |
| 220114_s_at | STAB2    | stabilin 2                                                         | 55576 | Hs.408249               | 109.59        | 97.69       | -1.26       | 0.047     |
| 211534_x_at | PTPRN2   | protein tyrosine phosphatase, receptor type, N polypeptide 2       | 5799  | Hs.490789               | 185.05        | 169.18      | -1.20       | 0.047     |
| 219218_at   |          |                                                                    | 79749 |                         | 79.34         | 86.24       | 1.18        | 0.047     |
| 207295_at   | SCNN1G   | sodium channel, nonvoltage-gated 1, gamma                          | 6340  | Hs.371727               | 27.76         | 25.75       | -1.16       | 0.047     |
| 200826_at   | SNRPD2   | small nuclear ribonucleoprotein D2 polypeptide 16.5kDa             | 6633  | Hs.515472               | 714.40        | 797.41      | 1.25        | 0.047     |
| 214340_at   | ALOX12P2 | arachidonate 12-lipoxygenase pseudogene 2                          | 245   | Hs.378695               | 121.59        | 112.26      | -1.17       | 0.047     |
| 205052_at   | AUH      | AU RNA binding protein/enoyl-Coenzyme A hydratase                  | 549   | Hs.175905               | 201.92        | 231.74      | 1.32        | 0.048     |
| 221486_at   | ENSA     | endosulfine alpha                                                  | 2029  | Hs.632456               | 537.89        | 601.04      | 1.25        | 0.048     |
| 211416_x_at | GGTLA4   | gamma-glutamyltransferase-like activity 4                          | 92086 | Hs.355394,<br>Hs.450000 | 80.00         | 71.40       | -1.26       | 0.048     |

| Probe       | Symbol   | Description                                                                       | Gene  | UniGene   | Av Exp Female | Av Exp Male | Fold Change | adj P val |
|-------------|----------|-----------------------------------------------------------------------------------|-------|-----------|---------------|-------------|-------------|-----------|
| 208409_at   | SLC14A2  | solute carrier family 14 (urea transporter), member 2                             | 8170  | Hs.660605 | 61.86         | 56.86       | -1.18       | 0.048     |
| 207524_at   | ST7      | suppression of tumorigenicity 7                                                   | 7982  | Hs.368131 | 161.89        | 147.79      | -1.20       | 0.048     |
| 220288_at   | MYO15A   | myosin XVA                                                                        | 51168 | Hs.462390 | 33.15         | 30.88       | -1.15       | 0.048     |
| 210530_s_at | NR2C1    | nuclear receptor subfamily 2, group C, member 1                                   | 7181  | Hs.108301 | 74.53         | 67.87       | -1.21       | 0.048     |
| 212296_at   | PSMD14   | proteasome (prosome, macropain) 26S subunit, non-ATPase, 14                       | 10213 | Hs.567410 | 453.59        | 523.61      | 1.33        | 0.048     |
| 217765_at   | NRBP1    | nuclear receptor binding protein 1                                                | 29959 | Hs.515876 | 171.81        | 191.54      | 1.24        | 0.048     |
| 211955_at   | RANBP5   | RAN binding protein 5                                                             | 3843  | Hs.643743 | 150.53        | 169.54      | 1.27        | 0.048     |
| 203866_at   | NLE1     | notchless homolog 1 (Drosophila)                                                  | 54475 | Hs.85570  | 48.69         | 44.31       | -1.21       | 0.048     |
| 220214_at   | ZNF215   | zinc finger protein 215                                                           | 7762  | Hs.523457 | 79.52         | 73.19       | -1.18       | 0.048     |
| 204049_s_at | PHACTR2  | phosphatase and actin regulator 2                                                 | 9749  | Hs.654921 | 157.81        | 212.64      | 1.82        | 0.048     |
| 202650_s_at | KIAA0195 | KIAA0195                                                                          | 9772  | Hs.514474 | 99.10         | 91.93       | -1.16       | 0.048     |
| 204320_at   | COL11A1  | collagen, type XI, alpha 1                                                        | 1301  | Hs.523446 | 26.74         | 24.73       | -1.17       | 0.048     |
| 202593_s_at | MIR16    | membrane interacting protein of RGS16                                             | 51573 | Hs.512607 | 220.80        | 293.89      | 1.77        | 0.048     |
| 204804_at   | TRIM21   | tripartite motif-containing 21                                                    | 6737  | Hs.532357 | 105.37        | 95.47       | -1.22       | 0.048     |
| 220872_at   | PRO2964  | hypothetical protein PRO2964                                                      | 55415 | Hs.621377 | 17.57         | 16.57       | -1.13       | 0.048     |
| 208780_x_at | VAPA     | VAMP (vesicle-associated membrane protein)-associated protein A, 33kDa            | 9218  | Hs.165195 | 1007.95       | 1154.16     | 1.31        | 0.048     |
| 204060_s_at | PRKX     | protein kinase, X-linked                                                          | 5613  | Hs.390788 | 29.65         | 32.80       | 1.22        | 0.048     |
| 206641_at   | TNFRSF17 | tumor necrosis factor receptor superfamily, member 17                             | 608   | Hs.2556   | 25.98         | 23.80       | -1.19       | 0.048     |
| 207302_at   | SGCG     | sarcoglycan, gamma (35kDa dystrophin-associated glycoprotein)                     | 6445  | Hs.37167  | 780.78        | 901.21      | 1.33        | 0.048     |
| 219452_at   | DPEP2    | dipeptidase 2                                                                     | 64174 | Hs.372633 | 51.61         | 45.81       | -1.27       | 0.048     |
| 219287_at   | KCNMB4   | potassium large conductance calcium-activated channel, subfamily M, beta member 4 | 27345 | Hs.525529 | 130.84        | 116.85      | -1.25       | 0.048     |
| 220986_s_at | TIGD6    | tigger transposable element derived 6                                             | 81789 | Hs.169333 | 12.32         | 11.77       | -1.10       | 0.048     |

| Probe       | Symbol   | Description                                                                   | Gene   | UniGene              | Av Exp<br>Female | Av Exp<br>Male | Fold<br>Change | adj P val |
|-------------|----------|-------------------------------------------------------------------------------|--------|----------------------|------------------|----------------|----------------|-----------|
| 221254_s_at | PITPNM3  | PITPNM family member 3                                                        | 83394  | Hs.183983            | 26.72            | 24.36          | -1.20          | 0.048     |
| 206042_x_at | SNURF    | SNRPN upstream reading frame                                                  | 8926   | Hs.564847            | 749.13           | 943.26         | 1.59           | 0.048     |
| 208949_s_at | LGALS3   | lectin, galactoside-binding, soluble, 3                                       | 3958   | Hs.531081            | 1377.59          | 1563.13        | 1.29           | 0.049     |
| 220506_at   | GUCY1B2  | guanylate cyclase 1, soluble, beta 2                                          | 2974   | Hs.411573            | 42.91            | 39.68          | -1.17          | 0.049     |
| 214470_at   | KLRB1    | killer cell lectin-like receptor subfamily B, member 1                        | 3820   | Hs.169824            | 57.42            | 49.41          | -1.35          | 0.049     |
| 200030_s_at | SLC25A3  | solute carrier family 25 (mitochondrial carrier; phosphate carrier), member 3 | 5250   | Hs.290404            | 4317.79          | 4727.73        | 1.20           | 0.049     |
| 38707_r_at  | E2F4     | E2F transcription factor 4, p107/p130-binding                                 | 1874   | Hs.108371            | 826.20           | 758.41         | -1.19          | 0.049     |
| 200771_at   | LAMC1    | laminin, gamma 1 (formerly LAMB2)                                             | 3915   | Hs.609663            | 473.61           | 552.90         | 1.36           | 0.049     |
| 205216_s_at | APOH     | apolipoprotein H (beta-2-glycoprotein I)                                      | 350    | Hs.445358            | 63.32            | 57.86          | -1.20          | 0.049     |
| 204041_at   | MAOB     | monoamine oxidase B                                                           | 4129   | Hs.654473            | 852.18           | 956.15         | 1.26           | 0.049     |
| 207465_at   | PRO0628  | PRO0628 protein                                                               | 29053  | Hs.655428            | 12.31            | 11.70          | -1.11          | 0.049     |
| 220643_s_at | FAIM     | Fas apoptotic inhibitory molecule                                             | 55179  | Hs.173438            | 15.96            | 17.09          | 1.15           | 0.049     |
| 206634_at   | SIX3     | SIX homeobox 3                                                                | 6496   | Hs.658847            | 32.38            | 29.11          | -1.24          | 0.049     |
| 208671_at   | SERINC1  | serine incorporator 1                                                         | 57515  | Hs.146668            | 358.29           | 439.43         | 1.50           | 0.049     |
| 205665_at   | TSPAN9   | tetraspanin 9                                                                 | 10867  | Hs.504517            | 109.31           | 120.67         | 1.22           | 0.049     |
| 206154_at   | RLBP1    | retinaldehyde binding protein 1                                               | 6017   | Hs.1933              | 87.96            | 78.63          | -1.25          | 0.049     |
| 215160_x_at |          |                                                                               | 91222  |                      | 63.21            | 73.02          | 1.33           | 0.049     |
| 204923_at   | CXorf9   | chromosome X open reading frame 9                                             | 54440  | Hs.61469             | 128.62           | 113.20         | -1.29          | 0.049     |
| 38964_r_at  | WAS      | Wiskott-Aldrich syndrome (eczema-thrombocytopenia)                            | 7454   | Hs.2157              | 418.72           | 386.41         | -1.17          | 0.049     |
| 212728_at   |          |                                                                               | 57490  |                      | 65.75            | 60.75          | -1.17          | 0.049     |
| 203657_s_at | CTSF     | cathepsin F                                                                   | 8722   | Hs.11590             | 204.74           | 234.29         | 1.31           | 0.049     |
| 210467_x_at | MAGEA12  | melanoma antigen family A, 12                                                 | 4111   | Hs.169246            | 17.41            | 16.21          | -1.15          | 0.049     |
| 221346_at   | OR10J1   | olfactory receptor, family 10, subfamily J, member 1                          | 26476  | Hs.532661            | 111.38           | 102.94         | -1.17          | 0.049     |
| 207701_at   | C22orf24 | chromosome 22 open reading frame 24                                           | 25775  | Hs.226755            | 137.67           | 127.07         | -1.17          | 0.049     |
| 215840_at   | DNAH2    | dynein, axonemal, heavy chain 2                                               | 146754 | Hs.367649            | 61.94            | 56.94          | -1.18          | 0.050     |
| 216544_at   | RBMY2FP  | RNA binding motif protein, Y-linked, family 2, member F                       | 159162 | Hs.567746, Hs.684794 | 30.91            | 28.71          | -1.16          | 0.050     |

| Probe       | Symbol   | Description                                                                    | Gene  | UniGene                | Av Exp Female | Av Exp Male | Fold Change | adj P val |
|-------------|----------|--------------------------------------------------------------------------------|-------|------------------------|---------------|-------------|-------------|-----------|
|             |          | pseudogene                                                                     |       |                        |               |             |             |           |
| 220270_at   |          |                                                                                | 54513 |                        | 23.32         | 21.80       | -1.14       | 0.050     |
| 39763_at    | HPX      | hemopexin                                                                      | 3263  | Hs.426485              | 212.23        | 196.62      | -1.17       | 0.050     |
| 44563_at    | WDR79    | WD repeat domain 79                                                            | 55135 | Hs.437460              | 146.75        | 135.65      | -1.17       | 0.050     |
| 220883_at   | PRO2012  | hypothetical protein PRO2012                                                   | 55478 |                        | 19.57         | 18.21       | -1.16       | 0.050     |
| 219159_s_at | SLAMF7   | SLAM family member 7                                                           | 57823 | Hs.517265              | 50.66         | 46.22       | -1.20       | 0.050     |
| 202561_at   | TNKS     | tankyrase, TRF1-interacting ankyrin-related ADP-ribose polymerase              | 8658  | Hs.370267              | 58.71         | 68.20       | 1.35        | 0.050     |
| 220310_at   | TUBAL3   | tubulin, alpha-like 3                                                          | 79861 | Hs.163079              | 22.57         | 21.03       | -1.15       | 0.050     |
| 218418_s_at | ANKRD25  | ankyrin repeat domain 25                                                       | 25959 | Hs.284208              | 576.97        | 660.57      | 1.31        | 0.050     |
| 220309_at   | TTC22    | tetratricopeptide repeat domain 22                                             | 55001 | Hs.16230               | 56.23         | 51.15       | -1.21       | 0.050     |
| 205265_s_at | SPEG     | SPEG complex locus                                                             | 10290 | Hs.21639,<br>Hs.631489 | 158.53        | 174.86      | 1.22        | 0.050     |
| 210321_at   | GZMH     | granzyme H (cathepsin G-like 2, protein h-CCPX)                                | 2999  | Hs.348264              | 86.97         | 78.97       | -1.21       | 0.050     |
| 201560_at   | CLIC4    | chloride intracellular channel 4                                               | 25932 | Hs.440544              | 556.74        | 633.53      | 1.29        | 0.050     |
| 219595_at   | ZNF26    | zinc finger protein 26                                                         | 7574  | Hs.489608              | 86.82         | 78.49       | -1.22       | 0.050     |
| 207040_s_at | ST13     | suppression of tumorigenicity 13 (colon carcinoma) (Hsp70 interacting protein) | 6767  | Hs.546303              | 605.44        | 687.46      | 1.29        | 0.050     |
| 221407_at   | GJA9     | gap junction protein, alpha 9, 36kDa                                           | 57369 | Hs.283816              | 137.18        | 122.26      | -1.26       | 0.050     |
| 219528_s_at | BCL11B   | B-cell CLL/lymphoma 11B (zinc finger protein)                                  | 64919 | Hs.510396              | 18.99         | 17.15       | -1.23       | 0.050     |
| 221178_at   | BAIAP2L2 | BAI1-associated protein 2-like 2                                               | 80115 | Hs.474822              | 20.33         | 18.94       | -1.15       | 0.050     |
| 219049_at   | ChGn     | chondroitin beta1,4 N-acetylgalactosaminyltransferase                          | 55790 | Hs.655166              | 214.54        | 259.81      | 1.47        | 0.050     |
| 219046_s_at | PKNOX2   | PBX/knotted 1 homeobox 2                                                       | 63876 | Hs.278564              | 248.56        | 231.36      | -1.15       | 0.050     |
| 208574_at   | SOX14    | SRY (sex determining region Y)-box 14                                          | 8403  | Hs.248184              | 18.23         | 16.96       | -1.16       | 0.050     |
| 207073_at   | CDKL2    | cyclin-dependent kinase-like 2 (CDC2-related kinase)                           | 8999  | Hs.591698              | 78.22         | 69.63       | -1.26       | 0.050     |
| 221335_x_at | C19orf61 | chromosome 19 open reading frame 61                                            | 56006 | Hs.466875              | 89.31         | 82.92       | -1.16       | 0.050     |
| 208088_s_at | CFHR5    | complement factor H-related 5                                                  | 81494 | Hs.282594              | 16.72         | 15.66       | -1.14       | 0.050     |

**Supplemental Table 2.** Overrepresented Gene Ontology Pathways. All, Male versus Female (A-G) and Female, Over versus under 55years (E)

**A) GO:0015672, Monovalent inorganic cation transport**

| EntrezID    | ProbeSet ID | Gene symbol | Description                                                                               |
|-------------|-------------|-------------|-------------------------------------------------------------------------------------------|
| 201172_x_at | 8992        | ATP6V0E1    | ATPase, H+ transporting, lysosomal 9kDa, V0 subunit e1                                    |
| 201527_at   | 9296        | ATP6V1F     | ATPase, H+ transporting, lysosomal 14kDa, V1 subunit F                                    |
| 202783_at   | 23530       | NNT         | nicotinamide nucleotide transhydrogenase                                                  |
| 204087_s_at | 8884        | SLC5A6      | solute carrier family 5 (sodium-dependent vitamin transporter), member 6                  |
| 204124_at   | 10568       | SLC34A2     | solute carrier family 34 (sodium phosphate), member 2                                     |
| 204723_at   | 55800       | SCN3B       | sodium channel, voltage-gated, type III, beta                                             |
| 205156_s_at | 41          | ACCN2       | amiloride-sensitive cation channel 2, neuronal                                            |
| 205243_at   | 64849       | SLC13A3     | solute carrier family 13 (sodium-dependent dicarboxylate transporter), member 3           |
| 205896_at   | 6583        | SLC22A4     | solute carrier family 22 (organic cation transporter), member 4                           |
| 206231_at   | 3780        | KCNN1       | potassium intermediate/small conductance calcium-activated channel, subfamily N, member 1 |
| 206417_at   | 1259        | CNGA1       | cyclic nucleotide gated channel alpha 1                                                   |
| 206830_at   | 57282       | SLC4A10     | solute carrier family 4, sodium bicarbonate transporter-like, member 10                   |
| 206872_at   | 6568        | SLC17A1     | solute carrier family 17 (sodium phosphate), member 1                                     |
| 207049_at   | 6334        | SCN8A       | sodium channel, voltage gated, type VIII, alpha subunit                                   |
| 207051_at   | 10050       | SLC17A4     | solute carrier family 17 (sodium phosphate), member 4                                     |
| 207141_s_at | 3760        | KCNJ3       | potassium inwardly-rectifying channel, subfamily J, member 3                              |
| 207185_at   | 6554        | SLC10A1     | solute carrier family 10 (sodium/bile acid cotransporter family), member 1                |
| 207217_s_at | 27035       | NOX1        | NADPH oxidase 1                                                                           |
| 207261_at   | 1261        | CNGA3       | cyclic nucleotide gated channel alpha 3                                                   |
| 207295_at   | 6340        | SCNN1G      | sodium channel, nonvoltage-gated 1, gamma                                                 |
| 207298_at   | 10786       | SLC17A3     | solute carrier family 17 (sodium phosphate), member 3                                     |
| 207600_at   | 3748        | KCNC3       | potassium voltage-gated channel, Shaw-related subfamily, member 3                         |
| 208172_s_at | 9312        | KCNB2       | potassium voltage-gated channel, Shab-related subfamily, member 2                         |
| 208564_at   | 3737        | KCNA2       | potassium voltage-gated channel, shaker-related subfamily, member 2                       |
| 208578_at   | 6336        | SCN10A      | sodium channel, voltage-gated, type X, alpha subunit                                      |
| 208678_at   | 529         | ATP6V1E1    | ATPase, H+ transporting, lysosomal 31kDa, V1 subunit E1                                   |
| 208737_at   | 9550        | ATP6V1G1    | ATPase, H+ transporting, lysosomal 13kDa, V1 subunit G1                                   |
| 210040_at   | 57468       | SLC12A5     | solute carrier family 12, (potassium-chloride transporter) member 5                       |
| 210261_at   | 3776        | KCNK2       | potassium channel, subfamily K, member 2                                                  |
| 210453_x_at | 10632       | ATP5L       | ATP synthase, H+ transporting, mitochondrial F0 complex, subunit G                        |
| 210454_s_at | 3763        | KCNJ6       | potassium inwardly-rectifying channel, subfamily J, member 6                              |
| 210739_x_at | 8671        | SLC4A4      | solute carrier family 4, sodium bicarbonate cotransporter, member 4                       |
| 210853_at   | 11280       | SCN11A      | sodium channel, voltage-gated, type XI, alpha subunit                                     |
| 211123_at   | 6528        | SLC5A5      | solute carrier family 5 (sodium iodide symporter), member 5                               |
| 211755_s_at | 515         | ATP5F1      | ATP synthase, H+ transporting, mitochondrial F0 complex, subunit B1                       |
| 211806_s_at | 3772        | KCNJ15      | potassium inwardly-rectifying channel, subfamily J, member 15                             |
| 213036_x_at | 489         | ATP2A3      | ATPase, Ca++ transporting, ubiquitous                                                     |
| 213587_s_at | 155066      | ATP6V0E2    | ATPase, H+ transporting V0 subunit e2                                                     |
| 214893_x_at | 610         | HCN2        | hyperpolarization activated cyclic nucleotide-gated potassium channel 2                   |
| 215267_s_at | 6543        | SLC8A2      | solute carrier family 8 (sodium-calcium exchanger), member 2                              |
| 215960_at   | 6527        | SLC5A4      | solute carrier family 5 (low affinity glucose cotransporter), member 4                    |
| 219287_at   | 27345       | KCNMB4      | potassium large conductance calcium-activated channel, subfamily M, beta member 4         |
| 219545_at   | 65987       | KCTD14      | potassium channel tetramerisation domain containing 14                                    |
| 219564_at   | 3773        | KCNJ16      | potassium inwardly-rectifying channel, subfamily J, member 16                             |
| 220181_x_at | 64924       | SLC30A5     | solute carrier family 30 (zinc transporter), member 5                                     |

|             |        |         |                                                                                  |
|-------------|--------|---------|----------------------------------------------------------------------------------|
| 220294_at   | 27012  | KCNV1   | potassium channel, subfamily V, member 1                                         |
| 220503_at   | 6561   | SLC13A1 | solute carrier family 13 (sodium/sulfate symporters), member 1                   |
| 220540_at   | 60598  | KCNK15  | potassium channel, subfamily K, member 15                                        |
| 220559_at   | 2019   | EN1     | engrailed homeobox 1                                                             |
| 220722_s_at | 60482  | SLC5A7  | solute carrier family 5 (choline transporter), member 7                          |
| 220740_s_at | 9990   | SLC12A6 | solute carrier family 12 (potassium/chloride transporters), member 6             |
| 220776_at   | 3770   | KCNJ14  | potassium inwardly-rectifying channel, subfamily J, member 14                    |
| 220867_s_at | 25769  | SLC24A2 | solute carrier family 24 (sodium/potassium/calcium exchanger), member 2          |
| 221125_s_at | 27094  | KCNMB3  | potassium large conductance calcium-activated channel, subfamily M beta member 3 |
| 222289_at   | 3747   | KCNC2   | potassium voltage-gated channel, Shaw-related subfamily, member 2                |
| 34858_at    | 23510  | KCTD2   | potassium channel tetramerisation domain containing 2                            |
| 45653_at    | 253980 | KCTD13  | potassium channel tetramerisation domain containing 13                           |

## B) GO:0007606, Sensory perception of chemical stimulus

| EntrezID    | ProbeSet ID | Gene symbol | Description                                              |
|-------------|-------------|-------------|----------------------------------------------------------|
| 208098_at   | 81696       | OR5V1       | olfactory receptor, family 5, subfamily V, member 1      |
| 208285_at   | 26659       | OR7A5       | olfactory receptor, family 7, subfamily A, member 5      |
| 208521_at   | 10798       | OR5I1       | olfactory receptor, family 5, subfamily I, member 1      |
| 208543_at   | 26538       | OR10H2      | olfactory receptor, family 10, subfamily H, member 2     |
| 208573_s_at | 7932        | OR2H2       | olfactory receptor, family 2, subfamily H, member 2      |
| 215463_at   | 26648       | OR7E24      | olfactory receptor, family 7, subfamily E, member 24     |
| 216408_at   | 81697       | OR2B2       | olfactory receptor, family 2, subfamily B, member 2      |
| 216522_at   | 26212       | OR2B6       | olfactory receptor, family 2, subfamily B, member 6      |
| 216817_s_at | 26716       | OR2H1       | olfactory receptor, family 2, subfamily H, member 1      |
| 220806_x_at | 51764       | GNG13       | guanine nucleotide binding protein (G protein), gamma 13 |
| 221346_at   | 26476       | OR10J1      | olfactory receptor, family 10, subfamily J, member 1     |
| 221375_at   | 8390        | OR1G1       | olfactory receptor, family 1, subfamily G, member 1      |
| 221388_at   | 8383        | OR1A1       | olfactory receptor, family 1, subfamily A, member 1      |
| 221391_at   | 50840       | TAS2R14     | taste receptor, type 2, member 14                        |
| 221392_at   | 50832       | TAS2R4      | taste receptor, type 2, member 4                         |
| 221397_at   | 50839       | TAS2R10     | taste receptor, type 2, member 10                        |
| 221398_at   | 50836       | TAS2R8      | taste receptor, type 2, member 8                         |
| 221431_s_at | 81797       | OR12D3      | olfactory receptor, family 12, subfamily D, member 3     |
| 221444_at   | 50833       | TAS2R16     | taste receptor, type 2, member 16                        |
| 221445_at   | 26189       | OR1A2       | olfactory receptor, family 1, subfamily A, member 2      |
| 221451_s_at | 26692       | OR2W1       | olfactory receptor, family 2, subfamily W, member 1      |
| 221464_at   | 4991        | OR1D2       | olfactory receptor, family 1, subfamily D, member 2      |
| 221465_at   | 8590        | OR6A2       | olfactory receptor, family 6, subfamily A, member 2      |

## C) GO:0006814; Sodium ion transport

| Entrez ID   | ProbeSet ID | Gene Symbol | Description                                                                     |
|-------------|-------------|-------------|---------------------------------------------------------------------------------|
| 210739_x_at | 8671        | SLC4A4      | solute carrier family 4, sodium bicarbonate cotransporter, member 4             |
| 204087_s_at | 8884        | SLC5A6      | solute carrier family 5 (sodium-dependent vitamin transporter), member 6        |
| 204124_at   | 10568       | SLC34A2     | solute carrier family 34 (sodium phosphate), member 2                           |
| 204723_at   | 55800       | SCN3B       | sodium channel, voltage-gated, type III, beta                                   |
| 205156_s_at | 41          | ACCN2       | amiloride-sensitive cation channel 2, neuronal                                  |
| 205243_at   | 64849       | SLC13A3     | solute carrier family 13 (sodium-dependent dicarboxylate transporter), member 3 |
| 205896_at   | 6583        | SLC22A4     | solute carrier family 22 (organic cation transporter), member 4                 |

|             |       |         |                                                                            |
|-------------|-------|---------|----------------------------------------------------------------------------|
| 206830_at   | 57282 | SLC4A10 | solute carrier family 4, sodium bicarbonate transporter-like, member 10    |
| 206872_at   | 6568  | SLC17A1 | solute carrier family 17 (sodium phosphate), member 1                      |
| 207049_at   | 6334  | SCN8A   | sodium channel, voltage gated, type VIII, alpha subunit                    |
| 207051_at   | 10050 | SLC17A4 | solute carrier family 17 (sodium phosphate), member 4                      |
| 207185_at   | 6554  | SLC10A1 | solute carrier family 10 (sodium/bile acid cotransporter family), member 1 |
| 207295_at   | 6340  | SCNN1G  | sodium channel, nonvoltage-gated 1, gamma                                  |
| 207298_at   | 10786 | SLC17A3 | solute carrier family 17 (sodium phosphate), member 3                      |
| 214893_x_at | 610   | HCN2    | hyperpolarization activated cyclic nucleotide-gated potassium channel 2    |
| 208578_at   | 6336  | SCN10A  | sodium channel, voltage-gated, type X, alpha subunit                       |
| 210040_at   | 57468 | SLC12A5 | solute carrier family 12, (potassium-chloride transporter) member 5        |
| 210853_at   | 11280 | SCN11A  | sodium channel, voltage-gated, type XI, alpha subunit                      |
| 211123_at   | 6528  | SLC5A5  | solute carrier family 5 (sodium iodide symporter), member 5                |
| 215267_s_at | 6543  | SLC8A2  | solute carrier family 8 (sodium-calcium exchanger), member 2               |
| 215960_at   | 6527  | SLC5A4  | solute carrier family 5 (low affinity glucose cotransporter), member 4     |
| 220503_at   | 6561  | SLC13A1 | solute carrier family 13 (sodium/sulfate symporters), member 1             |
| 220722_s_at | 60482 | SLC5A7  | solute carrier family 5 (choline transporter), member 7                    |
| 220740_s_at | 9990  | SLC12A6 | solute carrier family 12 (potassium/chloride transporters), member 6       |
| 220867_s_at | 25769 | SLC24A2 | solute carrier family 24 (sodium/potassium/calcium exchanger), member 2    |

#### D) GO:0006812; Cation transport

|             |        |          |                                                                                   |
|-------------|--------|----------|-----------------------------------------------------------------------------------|
| 207693_at   | 785    | CACNB4   | calcium channel, voltage-dependent, beta 4 subunit                                |
| 207951_at   | 1447   | CSN2     | casein beta                                                                       |
| 208172_s_at | 9312   | KCNB2    | potassium voltage-gated channel, Shab-related subfamily, member 2                 |
| 208564_at   | 3737   | KCNA2    | potassium voltage-gated channel, shaker-related subfamily, member 2               |
| 208578_at   | 6336   | SCN10A   | sodium channel, voltage-gated, type X, alpha subunit                              |
| 208678_at   | 529    | ATP6V1E1 | ATPase, H+ transporting, lysosomal 31kDa, V1 subunit E1                           |
| 208737_at   | 9550   | ATP6V1G1 | ATPase, H+ transporting, lysosomal 13kDa, V1 subunit G1                           |
| 210040_at   | 57468  | SLC12A5  | solute carrier family 12, (potassium-chloride transporter) member 5               |
| 211806_s_at | 3772   | KCNJ15   | potassium inwardly-rectifying channel, subfamily J, member 15                     |
| 210261_at   | 3776   | KCNK2    | potassium channel, subfamily K, member 2                                          |
| 210454_s_at | 3763   | KCNJ6    | potassium inwardly-rectifying channel, subfamily J, member 6                      |
| 210853_at   | 11280  | SCN11A   | sodium channel, voltage-gated, type XI, alpha subunit                             |
| 211123_at   | 6528   | SLC5A5   | solute carrier family 5 (sodium iodide symporter), member 5                       |
| 211755_s_at | 515    | ATP5F1   | ATP synthase, H+ transporting, mitochondrial F0 complex, subunit B1               |
| 34858_at    | 23510  | KCTD2    | potassium channel tetramerisation domain containing 2                             |
| 213587_s_at | 155066 | ATP6V0E2 | ATPase, H+ transporting V0 subunit e2                                             |
| 215267_s_at | 6543   | SLC8A2   | solute carrier family 8 (sodium-calcium exchanger), member 2                      |
| 215960_at   | 6527   | SLC5A4   | solute carrier family 5 (low affinity glucose cotransporter), member 4            |
| 218792_s_at | 54836  | BSPRY    | B-box and SPRY domain containing                                                  |
| 220181_x_at | 64924  | SLC30A5  | solute carrier family 30 (zinc transporter), member 5                             |
| 219287_at   | 27345  | KCNMB4   | potassium large conductance calcium-activated channel, subfamily M, beta member 4 |
| 219545_at   | 65987  | KCTD14   | potassium channel tetramerisation domain containing 14                            |
| 219564_at   | 3773   | KCNJ16   | potassium inwardly-rectifying channel, subfamily J, member 16                     |
| 220043_s_at | 4241   | MFI2     | antigen p97 identified by monoclonal antibodies 133.2 and 96.5                    |
| 220294_at   | 27012  | KCNV1    | potassium channel, subfamily V, member 1                                          |
| 220413_at   | 29986  | SLC39A2  | solute carrier family 39 (zinc transporter), member 2                             |
| 220435_at   | 55532  | SLC30A10 | solute carrier family 30, member 10                                               |
| 220503_at   | 6561   | SLC13A1  | solute carrier family 13 (sodium/sulfate symporters), member 1                    |
| 220540_at   | 60598  | KCNK15   | potassium channel, subfamily K, member 15                                         |
| 220559_at   | 2019   | EN1      | engrailed homeobox 1                                                              |
| 220722_s_at | 60482  | SLC5A7   | solute carrier family 5 (choline transporter), member 7                           |
| 220740_s_at | 9990   | SLC12A6  | solute carrier family 12 (potassium/chloride transporters), member 6              |



|             |        |         |                                                                                  |
|-------------|--------|---------|----------------------------------------------------------------------------------|
| 220776_at   | 3770   | KCNJ14  | potassium inwardly-rectifying channel, subfamily J, member 14                    |
| 220814_at   | 55676  | SLC30A6 | solute carrier family 30 (zinc transporter), member 6                            |
| 220867_s_at | 25769  | SLC24A2 | solute carrier family 24 (sodium/potassium/calcium exchanger), member 2          |
| 221102_s_at | 140803 | TRPM6   | transient receptor potential cation channel, subfamily M, member 6               |
| 221107_at   | 55584  | CHRNA9  | cholinergic receptor, nicotinic, alpha 9                                         |
| 221125_s_at | 27094  | KCNMB3  | potassium large conductance calcium-activated channel, subfamily M beta member 3 |
| 45653_at    | 253980 | KCTD13  | potassium channel tetramerisation domain containing 13                           |
| 222289_at   | 3747   | KCNC2   | potassium voltage-gated channel, Shaw-related subfamily, member 2                |

## E) GO:00030001; Metal ion transport

| Entrez ID   | ProbeSet ID | Gene Symbol | Description                                                                               |
|-------------|-------------|-------------|-------------------------------------------------------------------------------------------|
| 203880_at   | 10063       | COX17       | COX17 cytochrome c oxidase assembly homolog ( <i>S. cerevisiae</i> )                      |
| 204087_s_at | 8884        | SLC5A6      | solute carrier family 5 (sodium-dependent vitamin transporter), member 6                  |
| 204124_at   | 10568       | SLC34A2     | solute carrier family 34 (sodium phosphate), member 2                                     |
| 204624_at   | 540         | ATP7B       | ATPase, Cu <sup>++</sup> transporting, beta polypeptide                                   |
| 204723_at   | 55800       | SCN3B       | sodium channel, voltage-gated, type III, beta                                             |
| 205156_s_at | 41          | ACCN2       | amiloride-sensitive cation channel 2, neuronal                                            |
| 205243_at   | 64849       | SLC13A3     | solute carrier family 13 (sodium-dependent dicarboxylate transporter), member 3           |
| 205676_at   | 1594        | CYP27B1     | cytochrome P450, family 27, subfamily B, polypeptide 1                                    |
| 205896_at   | 6583        | SLC22A4     | solute carrier family 22 (organic cation transporter), member 4                           |
| 206231_at   | 3780        | KCNN1       | potassium intermediate/small conductance calcium-activated channel, subfamily N, member 1 |
| 206417_at   | 1259        | CNGA1       | cyclic nucleotide gated channel alpha 1                                                   |
| 206830_at   | 57282       | SLC4A10     | solute carrier family 4, sodium bicarbonate transporter-like, member 10                   |
| 206872_at   | 6568        | SLC17A1     | solute carrier family 17 (sodium phosphate), member 1                                     |
| 207049_at   | 6334        | SCN8A       | sodium channel, voltage gated, type VIII, alpha subunit                                   |
| 207051_at   | 10050       | SLC17A4     | solute carrier family 17 (sodium phosphate), member 4                                     |
| 207141_s_at | 3760        | KCNJ3       | potassium inwardly-rectifying channel, subfamily J, member 3                              |
| 207185_at   | 6554        | SLC10A1     | solute carrier family 10 (sodium/bile acid cotransporter family), member 1                |
| 207261_at   | 1261        | CNGA3       | cyclic nucleotide gated channel alpha 3                                                   |
| 207295_at   | 6340        | SCNN1G      | sodium channel, nonvoltage-gated 1, gamma                                                 |
| 207298_at   | 10786       | SLC17A3     | solute carrier family 17 (sodium phosphate), member 3                                     |
| 207362_at   | 7782        | SLC30A4     | solute carrier family 30 (zinc transporter), member 4                                     |
| 207600_at   | 3748        | KCNC3       | potassium voltage-gated channel, Shaw-related subfamily, member 3                         |
| 207693_at   | 785         | CACNB4      | calcium channel, voltage-dependent, beta 4 subunit                                        |
| 207951_at   | 1447        | CSN2        | casein beta                                                                               |
| 208172_s_at | 9312        | KCNB2       | potassium voltage-gated channel, Shab-related subfamily, member 2                         |
| 208564_at   | 3737        | KCNA2       | potassium voltage-gated channel, shaker-related subfamily, member 2                       |
| 208578_at   | 6336        | SCN10A      | sodium channel, voltage-gated, type X, alpha subunit                                      |
| 210040_at   | 57468       | SLC12A5     | solute carrier family 12, (potassium-chloride transporter) member 5                       |
| 210261_at   | 3776        | KCNK2       | potassium channel, subfamily K, member 2                                                  |
| 210454_s_at | 3763        | KCNJ6       | potassium inwardly-rectifying channel, subfamily J, member 6                              |
| 210739_x_at | 8671        | SLC4A4      | solute carrier family 4, sodium bicarbonate cotransporter, member 4                       |
| 210853_at   | 11280       | SCN11A      | sodium channel, voltage-gated, type XI, alpha subunit                                     |
| 210864_x_at | 3077        | HFE         | hemochromatosis                                                                           |
| 211123_at   | 6528        | SLC5A5      | solute carrier family 5 (sodium iodide symporter), member 5                               |
| 211806_s_at | 3772        | KCNJ15      | potassium inwardly-rectifying channel, subfamily J, member 15                             |
| 213036_x_at | 489         | ATP2A3      | ATPase, Ca <sup>++</sup> transporting, ubiquitous                                         |
| 214893_x_at | 610         | HCN2        | hyperpolarization activated cyclic nucleotide-gated potassium channel 2                   |
| 215267_s_at | 6543        | SLC8A2      | solute carrier family 8 (sodium-calcium exchanger), member 2                              |

|             |        |         |                                                                                      |
|-------------|--------|---------|--------------------------------------------------------------------------------------|
| 215960_at   | 6527   | SLC5A4  | solute carrier family 5 (low affinity glucose cotransporter), member 4               |
| 217287_s_at | 7225   | TRPC6   | transient receptor potential cation channel, subfamily C, member 6                   |
| 218792_s_at | 54836  | BSPRY   | B-box and SPRY domain containing                                                     |
| 219287_at   | 27345  | KCNMB4  | potassium large conductance calcium-activated channel, subfamily M, beta member 4    |
| 219545_at   | 65987  | KCTD14  | potassium channel tetramerisation domain containing 14                               |
| 219564_at   | 3773   | KCNJ16  | potassium inwardly-rectifying channel, subfamily J, member 16                        |
| 220043_s_at | 4241   | MFI2    | antigen p97 (melanoma associated) identified by monoclonal antibodies 133.2 and 96.5 |
| 220181_x_at | 64924  | SLC30A5 | solute carrier family 30 (zinc transporter), member 5                                |
| 220294_at   | 27012  | KCNV1   | potassium channel, subfamily V, member 1                                             |
| 220413_at   | 29986  | SLC39A2 | solute carrier family 39 (zinc transporter), member 2                                |
| 220503_at   | 6561   | SLC13A1 | solute carrier family 13 (sodium/sulfate symporters), member 1                       |
| 220540_at   | 60598  | KCNK15  | potassium channel, subfamily K, member 15                                            |
| 220559_at   | 2019   | EN1     | engrailed homeobox 1                                                                 |
| 220722_s_at | 60482  | SLC5A7  | solute carrier family 5 (choline transporter), member 7                              |
| 220740_s_at | 9990   | SLC12A6 | solute carrier family 12 (potassium/chloride transporters), member 6                 |
| 220776_at   | 3770   | KCNJ14  | potassium inwardly-rectifying channel, subfamily J, member 14                        |
| 220867_s_at | 25769  | SLC24A2 | solute carrier family 24 (sodium/potassium/calcium exchanger), member 2              |
| 221102_s_at | 140803 | TRPM6   | transient receptor potential cation channel, subfamily M, member 6                   |
| 221107_at   | 55584  | CHRNA9  | cholinergic receptor, nicotinic, alpha 9                                             |
| 221125_s_at | 27094  | KCNMB3  | potassium large conductance calcium-activated channel, subfamily M beta member 3     |
| 222289_at   | 3747   | KCNC2   | potassium voltage-gated channel, Shaw-related subfamily, member 2                    |
| 34858_at    | 23510  | KCTD2   | potassium channel tetramerisation domain containing 2                                |
| 45653_at    | 253980 | KCTD13  | potassium channel tetramerisation domain containing 13                               |

## F) GO:0007600; Sensory perception

| Entrez ID   | ProbeSet ID | Gene Symbol | Description                                              |
|-------------|-------------|-------------|----------------------------------------------------------|
| 208098_at   | 81696       | OR5V1       | olfactory receptor, family 5, subfamily V, member 1      |
| 208285_at   | 26659       | OR7A5       | olfactory receptor, family 7, subfamily A, member 5      |
| 208521_at   | 10798       | OR5I1       | olfactory receptor, family 5, subfamily I, member 1      |
| 208543_at   | 26538       | OR10H2      | olfactory receptor, family 10, subfamily H, member 2     |
| 208573_s_at | 7932        | OR2H2       | olfactory receptor, family 2, subfamily H, member 2      |
| 215463_at   | 26648       | OR7E24      | olfactory receptor, family 7, subfamily E, member 24     |
| 216408_at   | 81697       | OR2B2       | olfactory receptor, family 2, subfamily B, member 2      |
| 216522_at   | 26212       | OR2B6       | olfactory receptor, family 2, subfamily B, member 6      |
| 216817_s_at | 26716       | OR2H1       | olfactory receptor, family 2, subfamily H, member 1      |
| 220806_x_at | 51764       | GNG13       | guanine nucleotide binding protein (G protein), gamma 13 |
| 221346_at   | 26476       | OR10J1      | olfactory receptor, family 10, subfamily J, member 1     |
| 221375_at   | 8390        | OR1G1       | olfactory receptor, family 1, subfamily G, member 1      |
| 221388_at   | 8383        | OR1A1       | olfactory receptor, family 1, subfamily A, member 1      |
| 221391_at   | 50840       | TAS2R14     | taste receptor, type 2, member 14                        |
| 221392_at   | 50832       | TAS2R4      | taste receptor, type 2, member 4                         |
| 221397_at   | 50839       | TAS2R10     | taste receptor, type 2, member 10                        |
| 221398_at   | 50836       | TAS2R8      | taste receptor, type 2, member 8                         |
| 221431_s_at | 81797       | OR12D3      | olfactory receptor, family 12, subfamily D, member 3     |
| 221444_at   | 50833       | TAS2R16     | taste receptor, type 2, member 16                        |
| 221445_at   | 26189       | OR1A2       | olfactory receptor, family 1, subfamily A, member 2      |
| 221451_s_at | 26692       | OR2W1       | olfactory receptor, family 2, subfamily W, member 1      |
| 221464_at   | 4991        | OR1D2       | olfactory receptor, family 1, subfamily D, member 2      |
| 221465_at   | 8590        | OR6A2       | olfactory receptor, family 6, subfamily A, member 2      |

**G) GO:0007186; G-protein-coupled receptor signaling pathway**

| Entrez ID   | ProbeSet ID | Gene Symbol | Description                                                                                                              |
|-------------|-------------|-------------|--------------------------------------------------------------------------------------------------------------------------|
| 38447_at    | 156         | ADRBK1      | adrenergic, beta, receptor kinase 1                                                                                      |
| 211607_x_at | 1956        | EGFR        | epidermal growth factor receptor (erythroblastic leukemia viral (v-erb-b) oncogene homolog, avian)                       |
| 202849_x_at | 2870        | GRK6        | G protein-coupled receptor kinase 6                                                                                      |
| 203108_at   | 9052        | GPRC5A      | G protein-coupled receptor, family C, group 5, member A                                                                  |
| 203632_s_at | 51704       | GPRC5B      | G protein-coupled receptor, family C, group 5, member B                                                                  |
| 205184_at   | 2786        | GNG4        | guanine nucleotide binding protein (G protein), gamma 4                                                                  |
| 205240_at   | 29899       | GPSM2       | G-protein signaling modulator 2 (AGS3-like, <i>C. elegans</i> )                                                          |
| 205419_at   | 1880        | EBI2        | Epstein-Barr virus induced gene 2 (lymphocyte-specific G protein-coupled receptor)                                       |
| 205456_at   | 916         | CD3E        | CD3e molecule, epsilon (CD3-TCR complex)                                                                                 |
| 216738_at   | 3269        | HRH1        | histamine receptor H1                                                                                                    |
| 206171_at   | 140         | ADORA3      | adenosine A3 receptor                                                                                                    |
| 206281_at   | 116         | ADCYAP1     | adenylate cyclase activating polypeptide 1 (pituitary)                                                                   |
| 206326_at   | 2922        | GRP         | gastrin-releasing peptide                                                                                                |
| 206369_s_at | 5294        | PIK3CG      | phosphoinositide-3-kinase, catalytic, gamma polypeptide                                                                  |
| 206422_at   | 2641        | GCG         | glucagon                                                                                                                 |
| 206429_at   | 2150        | F2RL1       | coagulation factor II (thrombin) receptor-like 1                                                                         |
| 206525_at   | 2569        | GABRR1      | gamma-aminobutyric acid (GABA) receptor, rho 1                                                                           |
| 206586_at   | 1269        | CNR2        | cannabinoid receptor 2 (macrophage)                                                                                      |
| 206678_at   | 2554        | GABRA1      | gamma-aminobutyric acid (GABA) A receptor, alpha 1                                                                       |
| 206772_at   | 5746        | PTH2R       | parathyroid hormone receptor 2                                                                                           |
| 206841_at   | 5149        | PDE6H       | phosphodiesterase 6H, cGMP-specific, cone, gamma                                                                         |
| 206849_at   | 2566        | GABRG2      | gamma-aminobutyric acid (GABA) A receptor, gamma 2                                                                       |
| 206887_at   | 1238        | CCBP2       | chemokine binding protein 2                                                                                              |
| 211469_s_at | 10663       | CXCR6       | chemokine (C-X-C motif) receptor 6                                                                                       |
| 206988_at   | 6370        | CCL25       | chemokine (C-C motif) ligand 25                                                                                          |
| 206991_s_at | 1234        | CCR5        | chemokine (C-C motif) receptor 5                                                                                         |
| 206998_x_at | 5544        | PRB3        | proline-rich protein BstNI subfamily 3                                                                                   |
| 207014_at   | 2555        | GABRA2      | gamma-aminobutyric acid (GABA) A receptor, alpha 2                                                                       |
| 207111_at   | 2015        | EMR1        | egf-like module containing, mucin-like, hormone receptor-like 1                                                          |
| 207183_at   | 2842        | GPR19       | G protein-coupled receptor 19                                                                                            |
| 207240_s_at | 3973        | LHCGR       | luteinizing hormone/choriogonadotropin receptor                                                                          |
| 207333_at   | 4829        | NMBR        | neuromedin B receptor                                                                                                    |
| 207356_at   | 1673        | DEFB4       | defensin, beta 4                                                                                                         |
| 207400_at   | 4889        | NPY5R       | neuropeptide Y receptor Y5                                                                                               |
| 207445_s_at | 10803       | CCR9        | chemokine (C-C motif) receptor 9                                                                                         |
| 207455_at   | 5028        | P2RY1       | purinergic receptor P2Y, G-protein coupled, 1                                                                            |
| 207462_at   | 2742        | GLRA2       | glycine receptor, alpha 2                                                                                                |
| 207497_s_at | 2206        | MS4A2       | membrane-spanning 4-domains, subfamily A, member 2 (Fc fragment of IgE, high affinity I, receptor for; beta polypeptide) |
| 207642_at   | 3060        | HCRT        | hypocretin (orexin) neuropeptide precursor                                                                               |
| 211545_at   | 2692        | GHRHR       | growth hormone releasing hormone receptor                                                                                |
| 207897_at   | 1395        | CRHR2       | corticotropin releasing hormone receptor 2                                                                               |
| 207929_at   | 2925        | GRPR        | gastrin-releasing peptide receptor                                                                                       |
| 207940_x_at | 1268        | CNR1        | cannabinoid receptor 1 (brain)                                                                                           |
| 211359_s_at | 4988        | OPRM1       | opioid receptor, mu 1                                                                                                    |
| 208035_at   | 2916        | GRM6        | glutamate receptor, metabotropic 6                                                                                       |
| 208098_at   | 81696       | OR5V1       | olfactory receptor, family 5, subfamily V, member 1                                                                      |
| 208210_at   | 4142        | MAS1        | MAS1 oncogene                                                                                                            |
| 208248_x_at | 334         | APLP2       | amyloid beta (A4) precursor-like protein 2                                                                               |

|             |       |         |                                                                                          |
|-------------|-------|---------|------------------------------------------------------------------------------------------|
| 208260_at   | 553   | AVPR1B  | arginine vasopressin receptor 1B                                                         |
| 208285_at   | 26659 | OR7A5   | olfactory receptor, family 7, subfamily A, member 5                                      |
| 208311_at   | 9248  | GPR50   | G protein-coupled receptor 50                                                            |
| 208314_at   | 10692 | RRH     | retinal pigment epithelium-derived rhodopsin homolog                                     |
| 208376_at   | 1233  | CCR4    | chemokine (C-C motif) receptor 4                                                         |
| 208521_at   | 10798 | OR511   | olfactory receptor, family 5, subfamily I, member 1                                      |
| 208524_at   | 2838  | GPR15   | G protein-coupled receptor 15                                                            |
| 208543_at   | 26538 | OR10H2  | olfactory receptor, family 10, subfamily H, member 2                                     |
| 208573_s_at | 7932  | OR2H2   | olfactory receptor, family 2, subfamily H, member 2                                      |
| 210055_at   | 7253  | TSHR    | thyroid stimulating hormone receptor                                                     |
| 210393_at   | 8549  | LGR5    | leucine-rich repeat-containing G protein-coupled receptor 5                              |
| 210604_at   | 2780  | GNAT2   | guanine nucleotide binding protein (G protein), alpha transducing activity polypeptide 2 |
| 210799_at   | 3351  | HTR1B   | 5-hydroxytryptamine (serotonin) receptor 1B                                              |
| 211201_at   | 2492  | FSHR    | follicle stimulating hormone receptor                                                    |
| 211496_s_at | 5132  | PDC     | phosducin                                                                                |
| 216341_s_at | 2798  | GNRHR   | gonadotropin-releasing hormone receptor                                                  |
| 214529_at   | 7252  | TSHB    | thyroid stimulating hormone, beta                                                        |
| 214560_at   | 2359  | FPRL2   | formyl peptide receptor-like 2                                                           |
| 215396_at   | 84059 | GPR98   | G protein-coupled receptor 98                                                            |
| 215463_at   | 26648 | OR7E24  | olfactory receptor, family 7, subfamily E, member 24                                     |
| 216288_at   | 10800 | CYSLTR1 | cysteinyl leukotriene receptor 1                                                         |
| 216408_at   | 81697 | OR2B2   | olfactory receptor, family 2, subfamily B, member 2                                      |
| 216522_at   | 26212 | OR2B6   | olfactory receptor, family 2, subfamily B, member 6                                      |
| 216817_s_at | 26716 | OR2H1   | olfactory receptor, family 2, subfamily H, member 1                                      |
| 216881_x_at | 5545  | PRB4    | proline-rich protein BstNI subfamily 4                                                   |
| 216895_at   | 2567  | GABRG3  | gamma-aminobutyric acid (GABA) A receptor, gamma 3                                       |
| 217629_at   | 2793  | GNGT2   | guanine nucleotide binding protein (G protein), gamma transducing activity polypeptide 2 |
| 220313_at   | 54112 | GPR88   | G protein-coupled receptor 88                                                            |
| 220806_x_at | 51764 | GNG13   | guanine nucleotide binding protein (G protein), gamma 13                                 |
| 221297_at   | 55507 | GPRC5D  | G protein-coupled receptor, family C, group 5, member D                                  |
| 221299_at   | 54328 | GPR173  | G protein-coupled receptor 173                                                           |
| 221313_at   | 9293  | GPR52   | G protein-coupled receptor 52                                                            |
| 221346_at   | 26476 | OR10J1  | olfactory receptor, family 10, subfamily J, member 1                                     |
| 221354_s_at | 2847  | MCHR1   | melanin-concentrating hormone receptor 1                                                 |
| 221375_at   | 8390  | OR1G1   | olfactory receptor, family 1, subfamily G, member 1                                      |
| 221382_at   | 26701 | OR2N1P  | olfactory receptor, family 2, subfamily N, member 1 pseudogene                           |
| 221388_at   | 8383  | OR1A1   | olfactory receptor, family 1, subfamily A, member 1                                      |
| 221391_at   | 50840 | TAS2R14 | taste receptor, type 2, member 14                                                        |
| 221392_at   | 50832 | TAS2R4  | taste receptor, type 2, member 4                                                         |
| 221393_at   | 9288  | TAAR3   | trace amine associated receptor 3                                                        |
| 221394_at   | 9287  | TAAR2   | trace amine associated receptor 2                                                        |
| 221397_at   | 50839 | TAS2R10 | taste receptor, type 2, member 10                                                        |
| 221398_at   | 50836 | TAS2R8  | taste receptor, type 2, member 8                                                         |
| 221412_at   | 57191 | VN1R1   | vomer nasal 1 receptor 1                                                                 |
| 221431_s_at | 81797 | OR12D3  | olfactory receptor, family 12, subfamily D, member 3                                     |
| 221444_at   | 50833 | TAS2R16 | taste receptor, type 2, member 16                                                        |
| 221445_at   | 26189 | OR1A2   | olfactory receptor, family 1, subfamily A, member 2                                      |
| 221451_s_at | 26692 | OR2W1   | olfactory receptor, family 2, subfamily W, member 1                                      |
| 221458_at   | 3355  | HTR1F   | 5-hydroxytryptamine (serotonin) receptor 1F                                              |
| 221464_at   | 4991  | OR1D2   | olfactory receptor, family 1, subfamily D, member 2                                      |
| 221465_at   | 8590  | OR6A2   | olfactory receptor, family 6, subfamily A, member 2                                      |
| 221467_at   | 4160  | MC4R    | melanocortin 4 receptor                                                                  |

---

**H) GO: 0042770; DNA damage response, signal transduction**

---

| Entrez ID   | ProbeSet ID | Gene Symbol | Description                                                  |
|-------------|-------------|-------------|--------------------------------------------------------------|
| 202123_s_at | 25          | ABL1        | v-abl Abelson murine<br>leukemia viral<br>oncogene homolog 1 |
| 20800_at    | 2765        | GML         | GPI anchored molecule like protein                           |
| 221703_at   | 83990       | BRIP1       | BRCA1 interacting protein C-terminal helicase 1              |

**Supplemental Table 3.** Transcription factor binding site enrichment in male and female biased genes. PWM = positional weight matrix, TF = transcription factor

**Binding site enrichment within 1 kb promoters of female biased genes (1.2 fold or greater)**

| <b>PWM</b> | <b>TF family</b> | <b>TF</b> | <b>Foreground hits</b> | <b>Background hits</b> | <b>Enrichment Score</b> | <b>P</b> | <b>Q-value</b> |
|------------|------------------|-----------|------------------------|------------------------|-------------------------|----------|----------------|
| M00619     | Alx-4            | Alx-4     | 60                     | 162                    | 1.59                    | 0.002    | 0.036          |
| M00310     | APOLYA           | APOLYA    | 77                     | 214                    | 1.54                    | 0.0008   | 0.023          |
| M01066     | BLIMP1           | BLIMP1    | 121                    | 402                    | 1.29                    | 0.007    | 0.088          |
| M00109     | C/EBP            | C/EBPbeta | 91                     | 287                    | 1.36                    | 0.006    | 0.081          |
| M00416     | Cart-1           | Cart-1    | 50                     | 119                    | 1.80                    | 0.0005   | 0.019          |
| M00729     | CDX              | Cdx-2     | 53                     | 143                    | 1.59                    | 0.003    | 0.052          |
| M00991     | CDX              | CDX       | 44                     | 119                    | 1.58                    | 0.007    | 0.088          |
| M00269     | FOX              | XFD-3     | 63                     | 147                    | 1.83                    | 0.00006  | 0.005          |
| M00129     | FOX              | HFH-1     | 56                     | 155                    | 1.55                    | 0.004    | 0.058          |
| M00477     | FOX              | FOXO3     | 58                     | 166                    | 1.50                    | 0.006    | 0.078          |
| M00294     | FOX              | HFH-8     | 57                     | 165                    | 1.48                    | 0.007    | 0.089          |
| M00080     | GATA             | Evi-1     | 70                     | 159                    | 1.88                    | 0.00001  | 0.003          |
| M00078     | GATA             | Evi-1     | 63                     | 148                    | 1.82                    | 0.00006  | 0.005          |
| M00082     | GATA             | Evi-1     | 70                     | 176                    | 1.70                    | 0.0001   | 0.008          |
| M00079     | GATA             | Evi-1     | 80                     | 221                    | 1.55                    | 0.0005   | 0.020          |
| M00351     | GATA             | GATA-3    | 66                     | 179                    | 1.58                    | 0.001    | 0.030          |
| M00347     | GATA             | GATA-1    | 93                     | 284                    | 1.40                    | 0.003    | 0.047          |
| M00790     | HNF              | HNF-1     | 74                     | 193                    | 1.64                    | 0.0002   | 0.010          |
| M01011     | HNF              | HNF1      | 77                     | 212                    | 1.55                    | 0.0006   | 0.022          |
| M00206     | HNF              | HNF-1     | 69                     | 191                    | 1.55                    | 0.001    | 0.033          |
| M00132     | HNF              | HNF-1     | 79                     | 233                    | 1.45                    | 0.003    | 0.047          |
| M00639     | HNF-6            | HNF-6     | 47                     | 123                    | 1.64                    | 0.003    | 0.052          |
| M00640     | HOXA4            | HOXA4     | 63                     | 165                    | 1.63                    | 0.0007   | 0.022          |
| M00725     | HP1              | HP1       | 62                     | 149                    | 1.78                    | 0.0001   | 0.008          |
| M00436     | IPF1             | IPF1      | 62                     | 169                    | 1.57                    | 0.002    | 0.036          |
| M00978     | LEF1             | LEF1TCF1  | 117                    | 315                    | 1.59                    | 0.00001  | 0.003          |
| M00671     | LEF1             | TCF-4     | 64                     | 192                    | 1.43                    | 0.009    | 0.096          |

|        |        |          |     |     |      |         |       |
|--------|--------|----------|-----|-----|------|---------|-------|
| M00406 | MEF2   | MEF-2    | 66  | 177 | 1.60 | 0.0009  | 0.025 |
| M00405 | MEF2   | MEF-2    | 79  | 237 | 1.43 | 0.004   | 0.058 |
| M00403 | MEF2   | aMEF-2   | 61  | 177 | 1.48 | 0.006   | 0.079 |
| M00241 | NKX    | Nkx2-5   | 62  | 161 | 1.65 | 0.0006  | 0.022 |
| M00240 | NKX    | Nkx2-5   | 28  | 60  | 2.00 | 0.002   | 0.047 |
| M00161 | OCT    | OCT1     | 78  | 192 | 1.74 | 0.00003 | 0.005 |
| M00138 | OCT    | OCT1     | 47  | 103 | 1.95 | 0.0002  | 0.008 |
| M00930 | OCT    | OCT1     | 70  | 196 | 1.53 | 0.002   | 0.036 |
| M00162 | OCT    | OCT1     | 42  | 103 | 1.75 | 0.002   | 0.041 |
| M00210 | OCT    | OCT-x    | 72  | 206 | 1.50 | 0.002   | 0.042 |
| M00795 | OCT    | Octamer  | 70  | 203 | 1.48 | 0.003   | 0.052 |
| M00195 | OCT    | OCT1     | 79  | 240 | 1.41 | 0.005   | 0.073 |
| M00096 | PBX    | Pbx-1    | 62  | 145 | 1.83 | 0.00007 | 0.005 |
| M00802 | Pit-1  | Pit-1    | 44  | 121 | 1.56 | 0.008   | 0.096 |
| M01075 | PLZF   | PLZF     | 44  | 120 | 1.57 | 0.008   | 0.091 |
| M00744 | POU    | POU1F1   | 56  | 146 | 1.64 | 0.001   | 0.033 |
| M00465 | POU6F1 | POU6F1   | 59  | 157 | 1.61 | 0.001   | 0.033 |
| M00042 | SRY    | Sox-5    | 90  | 230 | 1.68 | 0.00003 | 0.005 |
| M00410 | SRY    | SOX-9    | 84  | 225 | 1.60 | 0.0002  | 0.008 |
| M00252 | TATA   | TATA     | 128 | 425 | 1.29 | 0.005   | 0.077 |
| M00311 | TATA   | ATATA    | 82  | 257 | 1.37 | 0.008   | 0.093 |
| M00707 | TFIIA  | TFIIA    | 155 | 529 | 1.25 | 0.005   | 0.077 |
| M00432 | TTF1   | TTF1     | 105 | 287 | 1.57 | 0.00005 | 0.005 |
| M01004 | ZNFN1A | Helios_A | 68  | 205 | 1.42 | 0.007   | 0.091 |

**Binding site enrichment within 1 kb promoters of male biased genes (1.2 fold or greater)**

| PWM    | TF family | TF            | Foreground hits | Background hits | Enrichment Score | P      | Q-value |
|--------|-----------|---------------|-----------------|-----------------|------------------|--------|---------|
| M00740 | E2F       | Rb:E2F-1:DP-1 | 217             | 1395            | 1.26             | 0.0001 | 0.07    |
| M00425 | E2F       | E2F           | 259             | 1741            | 1.20             | 0.0003 | 0.08    |

**Supplemental Table 4.** Genes in the All Male versus Female comparison that exhibit > 2-fold absolute fold change and adjusted *P* value < 0.05.

| Probe       | Symbol  | Description                                                            | Chr | LocusLink | UniGene   | Gene Ontology                                                                                                                                                                                                                                                                                                          | Av exp F | Av exp M | FC     | adj.P.Val |
|-------------|---------|------------------------------------------------------------------------|-----|-----------|-----------|------------------------------------------------------------------------------------------------------------------------------------------------------------------------------------------------------------------------------------------------------------------------------------------------------------------------|----------|----------|--------|-----------|
| 204409_s_at | EIF1AY  | eukaryotic translation initiation factor 1A, Y-linked                  | Y   | 9086      | Hs.461178 | GO:0006413: translational initiation, GO:0003723: RNA binding, GO:0003743: translation initiation factor activity, GO:0005515: protein binding                                                                                                                                                                         | 12.51    | 210.22   | 282.40 | 3.40E-63  |
| 201909_at   | RPS4Y1  | ribosomal protein S4, Y-linked 1                                       | Y   | 6192      | Hs.282376 | GO:0006412: translation, GO:0006412: translation, GO:0005622: intracellular, GO:0005840: ribosome, GO:0005843: cytosolic small ribosomal subunit (sensu Eukaryota), GO:0003735: structural constituent of ribosome, GO:0003735: structural constituent of ribosome, GO:0019843: rRNA binding                           | 88.82    | 1065.96  | 144.04 | 2.41E-71  |
| 205000_at   | DDX3Y   | DEAD (Asp-Glu-Ala-Asp) box polypeptide 3, Y-linked                     | Y   | 8653      | Hs.99120  | GO:0005634: nucleus, GO:0000166: nucleotide binding, GO:0003677: DNA binding, GO:0003723: RNA binding, GO:0005524: ATP binding, GO:0008026: ATP-dependent helicase activity, GO:0016787: hydrolase activity                                                                                                            | 18.34    | 79.94    | 19.00  | 1.43E-32  |
| 206700_s_at | JARID1D | jumonji, AT rich interactive domain 1D                                 | Y   | 8284      | Hs.80358  | GO:0006355: regulation of transcription, DNA-dependent, GO:0007283: spermatogenesis, GO:0005575: cellular_component, GO:0005622: intracellular, GO:0005634: nucleus, GO:0003674: molecular_function, GO:0003677: DNA binding, GO:0005515: protein binding, GO:0008270: zinc ion binding, GO:0046872: metal ion binding | 68.10    | 175.69   | 6.66   | 8.09E-33  |
| 206624_at   | USP9Y   | ubiquitin specific peptidase 9, Y-linked (fat facets-like, Drosophila) | Y   | 8287      | Hs.165856 | GO:0006511: ubiquitin-dependent protein catabolic process, GO:0006512: ubiquitin cycle, GO:0007283: spermatogenesis, GO:0004221: ubiquitin thiolesterase activity, GO:0005509: calcium ion binding, GO:0005544: calcium-dependent phospholipid binding, GO:0008234: cysteine-type                                      | 17.05    | 35.70    | 4.38   | 1.02E-16  |



peptidase activity

|             |         |                                                  |    |       |                                 |                                                                                                                                                                                                                                                                               |             |             |             |             |
|-------------|---------|--------------------------------------------------|----|-------|---------------------------------|-------------------------------------------------------------------------------------------------------------------------------------------------------------------------------------------------------------------------------------------------------------------------------|-------------|-------------|-------------|-------------|
| 207063_at   | CYorf14 | chromosome Y open reading frame 14               | Y  | 55410 |                                 |                                                                                                                                                                                                                                                                               | 47.30       | 87.48       | 3.42        | 9.28E-27    |
| 210395_x_at | MYL4    | myosin, light chain 4, alkali; atrial, embryonic | 17 | 4635  | Hs.463300                       | GO:0006941: striated muscle contraction, GO:0007517: muscle development, GO:0005859: muscle myosin complex, GO:0016459: myosin complex, GO:0003774: myosin complex, GO:0003774: motor activity, GO:0005509: calcium ion binding, GO:0008307: structural constituent of muscle | 388.3240636 | 616.5254325 | 2.520654869 | 0.015411784 |
| 202761_s_at | SYNE2   | spectrin repeat containing, nuclear envelope 2   | 14 | 23224 | Hs.525392                       | GO:0005856: cytoskeleton, GO:0016020: membrane, GO:0016021: integral to membrane, GO:0003779: actin binding, GO:0005198: structural molecule activity                                                                                                                         | 177.8113982 | 280.9962476 | 2.497363999 | 0.006245176 |
| 214365_at   | TPM3    | tropomyosin 3                                    | 1  | 7170  | Hs.129512, Hs.535581, Hs.644306 | GO:0006928: cell motility, GO:0006937: regulation of muscle contraction, GO:0005856: cytoskeleton, GO:0005856: cytoskeleton, GO:0005862: muscle thin filament tropomyosin, GO:0003674: molecular_function, GO:0003779: actin binding                                          | 239.4311189 | 373.6240922 | 2.435053768 | 0.017537758 |
| 201222_s_at | RAD23B  | RAD23 homolog B (S. cerevisiae)                  | 9  | 5887  | Hs.521640                       | GO:0006289: nucleotide-excision repair, GO:0006464: protein modification, GO:0006512: ubiquitin cycle, GO:0007283: spermatogenesis, GO:0005634: nucleus, GO:0003697: single-stranded DNA binding, GO:0005515: protein binding                                                 | 127.3214201 | 191.4833004 | 2.261824274 | 0.01095177  |
| 209070_s_at | RGS5    | regulator of G-protein signalling 5              | 1  | 8490  | Hs.24950                        | GO:0008277: regulation of G-protein coupled receptor protein signaling pathway, GO:0009968: negative regulation of signal transduction, GO:0004871: signal transducer activity, GO:0005096: GTPase activator activity                                                         | 885.5066823 | 1284.162782 | 2.103083286 | 0.021788644 |
| 202784_s_at | NNT     | nicotinamide nucleotide transhydrogenase         | 5  | 23530 | Hs.482043                       | GO:0006099: tricarboxylic acid cycle, GO:0006118: electron transport, GO:0006118: electron transport, GO:0015992: proton transport, GO:0015992: proton transport, GO:0005739:                                                                                                 | 269.1412    | 390.0852578 | 2.100674224 | 0.029623113 |

|             |             |                                                                                  |      |        |                         |                                                                                                                                                                                                                                                                                                                                                                                                                                                                                                                                                       |                 |                 |                      |                 |
|-------------|-------------|----------------------------------------------------------------------------------|------|--------|-------------------------|-------------------------------------------------------------------------------------------------------------------------------------------------------------------------------------------------------------------------------------------------------------------------------------------------------------------------------------------------------------------------------------------------------------------------------------------------------------------------------------------------------------------------------------------------------|-----------------|-----------------|----------------------|-----------------|
|             |             |                                                                                  |      |        |                         | mitochondrion, GO:0005746:<br>mitochondrial electron transport<br>chain, GO:0016020: membrane,<br>GO:0016021: integral to membrane,<br>GO:0003957: NAD(P)+<br>transhydrogenase (B-specific)<br>activity, GO:0008750: NAD(P)+<br>transhydrogenase (AB-specific)<br>activity, GO:0016491:<br>oxidoreductase activity,<br>GO:0050661: NADP binding,<br>GO:0051287: NAD binding                                                                                                                                                                           |                 |                 |                      |                 |
| 209896_s_at | PTPN11      | protein tyrosine<br>phosphatase, non-<br>receptor type 11<br>(Noonan syndrome 1) | 12   | 5781   | Hs.506852,<br>Hs.646231 | GO:0000077: DNA damage<br>checkpoint, GO:0000187: activation<br>of MAPK activity, GO:0006470:<br>protein amino acid<br>dephosphorylation, GO:0007242:<br>intracellular signaling cascade,<br>GO:0007409: axonogenesis,<br>GO:0007605: sensory perception of<br>sound, GO:0046825: regulation of<br>protein export from nucleus,<br>GO:0048011: nerve growth factor<br>receptor signaling pathway,<br>GO:0004726: non-membrane<br>spanning protein tyrosine<br>phosphatase activity, GO:0005515:<br>protein binding, GO:0016787:<br>hydrolase activity | 143.3962<br>829 | 206.8691<br>352 | 2.0812<br>08594      | 0.034520<br>364 |
| 209485_s_at | OSBPL1<br>A | oxysterol binding<br>protein-like 1A                                             | 18   | 114876 | Hs.370725               | GO:0006869: lipid transport,<br>GO:0008202: steroid metabolic<br>process, GO:0008203: cholesterol<br>metabolic process, GO:0016192:<br>vesicle-mediated transport,<br>GO:0005622: intracellular,<br>GO:0005543: phospholipid binding                                                                                                                                                                                                                                                                                                                  | 96.72617<br>494 | 138.5502<br>527 | 2.0517<br>60273      | 0.004236<br>546 |
| 201028_s_at | CD99        | CD99 molecule                                                                    | X, Y | 4267   | Hs.495605               | GO:0007155: cell adhesion,<br>GO:0005737: cytoplasm,<br>GO:0005886: plasma membrane,<br>GO:0005887: integral to plasma<br>membrane, GO:0005515: protein<br>binding                                                                                                                                                                                                                                                                                                                                                                                    | 321.4002<br>338 | 457.9935<br>774 | 2.0306<br>09431      | 0.000638<br>864 |
| 220232_at   | SCD5        | stearoyl-CoA<br>desaturase 5                                                     | 4    | 79966  | Hs.379191               | GO:0006629: lipid metabolic<br>process, GO:0006633: fatty acid<br>biosynthetic process, GO:0005783:<br>endoplasmic reticulum,<br>GO:0016020: membrane,<br>GO:0016021: integral to membrane,<br>GO:0004768: stearoyl-CoA 9-<br>desaturase activity, GO:0005506:<br>iron ion binding, GO:0016491:                                                                                                                                                                                                                                                       | 180.3372<br>663 | 126.0962<br>571 | -<br>2.0453<br>44996 | 0.003547<br>101 |

oxidoreductase activity,  
GO:0016717: oxidoreductase  
activity, acting on paired donors,  
with oxidation of a pair of donors  
resulting in the reduction of  
molecular oxygen to two molecules  
of water

---

|                 |      |                                     |   |      |           |                 |                 |                      |          |
|-----------------|------|-------------------------------------|---|------|-----------|-----------------|-----------------|----------------------|----------|
| 221728_x_a<br>t | XIST | X (inactive)-specific<br>transcript | X | 7503 | Hs.529901 | 275.3525<br>987 | 37.22739<br>217 | -<br>54.708<br>28873 | 9.93E-62 |
|-----------------|------|-------------------------------------|---|------|-----------|-----------------|-----------------|----------------------|----------|
